# Supplementary material for: Novel Phosphorylated Penta-1,4-dien-3-one Derivatives: Design, Synthesis, and Biological Activity
Source: PubMed Central journal article supplement (PMC6429309; doi:10.3390/molecules24050925), 2019-03-07
Supplement: molecules-24-00925-s001.pdf [file molecules-24-00925-s001.pdf]

# Supporting Information

## Novel phosphorylated penta-1,4-dien-3-one derivatives: Design, synthesis, and biological activity

Lijuan Chen<sup>†</sup>, Tao Guo<sup>†</sup>, Rongjiao Xia, Xu Tang, Ying Chen,  
Cheng Zhang, Wei Xue\*

State Key Laboratory Breeding Base of Green Pesticide and Agricultural  
Bioengineering, Key Laboratory of Green Pesticide and Agriculture Bioengineering,  
Ministry of Education,  
Guizhou University, Huaxi District, Guiyang 550025, China; E-Mails:  
13765645934@sina.com (L. C.); guotao9405@163.com (T. G.); xrjiao@163.com (R.  
X.); tx1173182020@163.com (X. T.); 15286114381@163.com (Y. C.);  
zhangcheng6954@163.com (C. Z.).

<sup>†</sup> These authors contributed equally to this work.

\* Corresponding author: Wei Xue; e-mail: wxue@gzu.edu.cn (W.X.); Tel/Fax:  
0086-851-88292090

### Content

|                                                     |    |
|-----------------------------------------------------|----|
| 1. The physical properties of compounds 3a-3s ..... | 2  |
| 2. The data of title compounds 3a-3s .....          | 2  |
| 3. Spectrogram of title compounds 3a-3s .....       | 11 |

## 1. The physical properties of compounds 3a-3s

Table 1 The physical properties of compounds 3a-3s

| Compd. | R <sub>1</sub>         | R <sub>2</sub>                  | Appearance   | Yield /% | m.p./°C | Values of R <sub>f</sub> |
|--------|------------------------|---------------------------------|--------------|----------|---------|--------------------------|
| 3a     | 4-Cl-Ph                | CH <sub>3</sub>                 | Yellow solid | 48       | 114-115 | 0.35                     |
| 3b     | 4-Cl-Ph                | CH <sub>2</sub> CH <sub>3</sub> | Yellow oil   | 44       | -       | 0.55                     |
| 3c     | 4-OCH <sub>3</sub> -Ph | CH <sub>3</sub>                 | Yellow solid | 52       | 62-63   | 0.35                     |
| 3d     | 4-OCH <sub>3</sub> -Ph | CH <sub>2</sub> CH <sub>3</sub> | Yellow solid | 56       | 72-73   | 0.55                     |
| 3e     | 2-Cl-Ph                | CH <sub>3</sub>                 | Yellow oil   | 58       | -       | 0.35                     |
| 3f     | 2-Cl-Ph                | CH <sub>2</sub> CH <sub>3</sub> | Yellow oil   | 60       | -       | 0.55                     |
| 3g     | 3-NO <sub>2</sub> -Ph  | CH <sub>3</sub>                 | Yellow oil   | 69       | -       | 0.35                     |
| 3h     | 3-NO <sub>2</sub> -Ph  | CH <sub>2</sub> CH <sub>3</sub> | Yellow solid | 65       | 86-87   | 0.55                     |
| 3i     | 4-NO <sub>2</sub> -Ph  | CH <sub>3</sub>                 | Yellow solid | 53       | 119-120 | 0.35                     |
| 3j     | 4-NO <sub>2</sub> -Ph  | CH <sub>2</sub> CH <sub>3</sub> | Yellow solid | 58       | 100-101 | 0.55                     |
| 3k     | 4-CH <sub>3</sub> -Ph  | CH <sub>2</sub> CH <sub>3</sub> | Yellow oil   | 50       | -       | 0.55                     |
| 3l     | Ph                     | CH <sub>3</sub>                 | Yellow oil   | 42       | -       | 0.35                     |
| 3m     | Ph                     | CH <sub>2</sub> CH <sub>3</sub> | Yellow solid | 65       | 70 -71  | 0.55                     |
| 3n     | 4-Br-Ph                | CH <sub>3</sub>                 | Yellow oil   | 71       | -       | 0.35                     |
| 3o     | 4-Br-Ph                | CH <sub>2</sub> CH <sub>3</sub> | Yellow solid | 68       | 79-80   | 0.55                     |
| 3p     | 3-CF <sub>3</sub> -Ph  | CH <sub>3</sub>                 | Yellow solid | 63       | 65-66   | 0.35                     |
| 3o     | 3-CF <sub>3</sub> -Ph  | CH <sub>2</sub> CH <sub>3</sub> | Yellow oil   | 72       | -       | 0.55                     |
| 3r     | 3-CF <sub>3</sub> -Ph  | CH <sub>3</sub>                 | Yellow oil   | 69       | -       | 0.35                     |
| 3s     | 3-CH <sub>3</sub> -Ph  | CH <sub>2</sub> CH <sub>3</sub> | Yellow oil   | 65       | -       | 0.55                     |

## 2. The data of title compounds 3a-3s

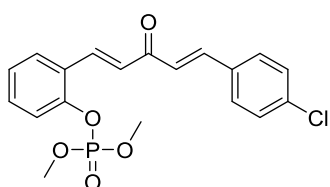

### Data for

2-((1E,4E)-5-(4-chlorophenyl)-3-oxopenta-1,4-dien-1-yl)phenyl dimethyl phosphate (**3a**): Yellow solid, m.p. 114-115 °C, yield 48%. <sup>1</sup>H NMR (500 MHz, CDCl<sub>3</sub>) δ 8.00 (d, *J* = 16.1

Hz, 1H, Ar(2-O)-CH=), 7.67 (s, 1H, Ar-H), 7.64 (d, *J* = 9.8 Hz, 1H, Ar-H), 7.51 (s, 1H, Ar-H),

7.49 (s, 1H, Ar-H), 7.38 – 7.35 (m, 2H, Ar-H, 4-Cl)-CH=), 7.35 (d,  $J = 2.0$  Hz, 1H, Ar-H), 7.33 (d,  $J = 1.9$  Hz, 1H, Ar-H), 7.22 – 7.17 (m, 1H, Ar-H), 7.08 (d,  $J = 16.0$  Hz, 1H, Ar(4-Cl)-C=CH), 7.00 (d,  $J = 16.0$  Hz, 1H, Ar(4-Cl)-C=CH), 3.87 (s, 3H, CH<sub>3</sub>), 3.85 (s, 3H, CH<sub>3</sub>). <sup>13</sup>C NMR (126 MHz, CDCl<sub>3</sub>) δ 188.71, 149.63, 149.58, 142.22, 136.95, 136.53, 133.28, 131.86, 129.65, 129.34, 128.14, 127.07, 126.59, 126.53, 125.93, 125.63, 120.77, 55.32, 55.28. <sup>31</sup>P NMR (202 MHz, CDCl<sub>3</sub>) δ -3.75. HRMS calcd for C<sub>19</sub>H<sub>19</sub>ClO<sub>3</sub>P [M+H]<sup>+</sup> 393.0653, found 393.0645.

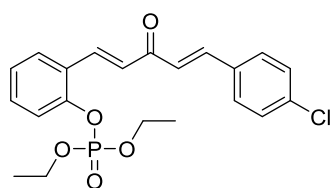

**Data for**

4-((1E,4E)-5-(4-chlorophenyl)-3-oxopenta-1,4-dien-1-yl)phenyl diethyl phosphate (**3b**): Yellow oil, yield 44%. <sup>1</sup>H NMR (400 MHz, CDCl<sub>3</sub>) δ 8.04 (d,  $J = 16.1$  Hz, 1H, Ar(2-O)-CH=), 7.73 – 7.64 (m, 2H, Ar-2H), 7.54 (d,  $J = 8.5$  Hz, 2H, Ar-2H), 7.43 (d,  $J = 8.2$  Hz, 1H, Ar-H), 7.40 (d,  $J = 9.0$  Hz, 2H, Ar(4-Cl)-CH=, Ar-H), 7.36 (s, 1H, Ar-H), 7.22 (t,  $J = 7.4$  Hz, 1H, Ar-H), 7.10 (d,  $J = 9.0$  Hz, 1H, Ar(2-O)-C=CH), 7.08 – 7.03 (m, 1H, Ar(4-Cl)-C=CH), 4.30 – 4.21 (m, 4H, 2CH<sub>2</sub>), 1.36 (td,  $J = 7.1, 0.8$  Hz, 6H, 2CH<sub>3</sub>). <sup>13</sup>C NMR (101 MHz, CDCl<sub>3</sub>) δ 188.69, 149.76, 149.69, 142.00, 137.12, 136.39, 133.27, 131.69, 129.53, 129.23, 127.99, 127.03, 126.54, 126.47, 125.72, 125.36, 120.80, 64.98, 64.92, 16.15, 16.08. <sup>31</sup>P NMR (162 MHz, CDCl<sub>3</sub>) δ -6.43. HRMS calcd for C<sub>21</sub>H<sub>23</sub>ClO<sub>5</sub>P [M+H]<sup>+</sup> 421.0966, found 421.0958.

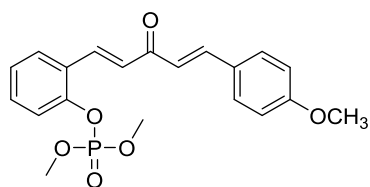

**Data for**

2-((1E,4E)-5-(4-methoxyphenyl)-3-oxopenta-1,4-dien-1-yl)phenyl dimethyl phosphate (**3c**): Yellow solid, m.p. 62-63 °C, yield 52%. <sup>1</sup>H NMR (500 MHz, CDCl<sub>3</sub>) δ 8.01 (d,  $J = 16.0$  Hz, 1H, Ar(2-O)-CH=), 7.71 (t,  $J = 12.7$ , 2H, Ar-2H), 7.50 (d,  $J = 8.0$  Hz, 2H, Ar-H, Ar(4-OCH<sub>3</sub>)-CH=), 7.43 – 7.36 (m, 2H, Ar-2H), 7.22 (t,  $J = 8.5$  Hz, 3H, Ar-3H), 7.12 (d,  $J = 16.0$  Hz, 1H, Ar(2-O)-C=CH), 7.02 (d,  $J = 15.9$  Hz, 1H, Ar(4-OCH<sub>3</sub>)-C=CH), 3.91 (s, 3H, CH<sub>3</sub>), 3.88 (s, 3H, CH<sub>3</sub>), 2.38 (s, 3H, CH<sub>3</sub>). <sup>13</sup>C NMR (126 MHz, CDCl<sub>3</sub>) δ 189.04, 149.62, 143.86, 141.30, 136.52, 132.04, 131.70, 129.85, 128.65, 128.54, 128.13, 127.79, 127.26,

126.74, 126.69, 125.59, 124.67, 120.75, 55.33, 21.66.  $^{31}\text{P}$  NMR (202 MHz,  $\text{CDCl}_3$ )  $\delta$  -3.78.

HRMS calcd for  $\text{C}_{20}\text{H}_{22}\text{O}_6\text{P}$   $[\text{M}+\text{H}]^+$  389.1148, found 389.1124.

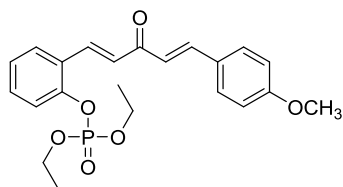

**Data for**

diethyl(2-((1E,4E)-5-(4-methoxyphenyl)-3-oxopenta-1,4-dien-1-yl)phenyl) phosphate (**3d**): Yellow solid, m.p. 72-73 °C, yield 56%.  $^1\text{H}$  NMR (400 MHz,  $\text{CDCl}_3$ )  $\delta$  8.02 (d,  $J$  = 16.1 Hz,

1H, Ar(2-O)-CH=), 7.71 (t,  $J$  = 11.6 Hz, 2H, Ar-2H), 7.57 (d,  $J$  = 8.7 Hz, 2H, Ar-H, Ar(4-OCH<sub>3</sub>)-CH=), 7.47 – 7.35 (m, 2H, Ar-2H), 7.22 (t,  $J$  = 7.5 Hz, 1H, Ar(2-O)-C=CH), 7.11 (d,  $J$  = 16.1 Hz, 1H, Ar(4-OCH<sub>3</sub>)-C=CH), 6.94 (dd,  $J$  = 13.0, 10.0, 8.9 Hz, 3H, CH<sub>3</sub>), 4.31 – 4.20 (m, 4H, 2CH<sub>2</sub>), 3.85 (s, 3H, CH<sub>3</sub>), 1.39 – 1.32 (m, 6H, 2CH<sub>3</sub>).  $^{13}\text{C}$  NMR (101 MHz,  $\text{CDCl}_3$ )  $\delta$  188.90, 161.72, 149.72, 149.65, 143.42, 136.42, 131.45, 130.17, 127.97, 127.46, 127.35, 126.75, 126.69, 125.30, 123.22, 120.79, 114.47, 64.97, 64.91, 55.43, 16.16, 16.09.  $^{31}\text{P}$  NMR (162 MHz,  $\text{CDCl}_3$ )  $\delta$  -6.13. HRMS calcd for  $\text{C}_{22}\text{H}_{26}\text{O}_6\text{P}$   $[\text{M}+\text{H}]^+$  417.1461, found 417.1450.

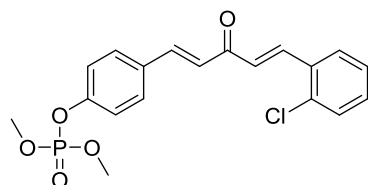

**Data for**

2-((1E,4E)-5-(2-chlorophenyl)-3-oxopenta-1,4-dien-1-yl)phenyl dimethyl phosphate (**3e**): Yellow oil, yield 58%.

$^1\text{H}$  NMR (400 MHz,  $\text{CDCl}_3$ )  $\delta$  8.14 (d,  $J$  = 16.1 Hz, 1H, Ar(2-Cl)-CH=), 8.06 (d,  $J$  = 16.0 Hz, 1H, Ar(2-O)-CH=), 7.72 (d,  $J$  = 7.2 Hz, 2H, Ar-2H), 7.46 – 7.40 (m, 3H, Ar-3H), 7.37 – 7.31 (m, 2H, Ar-2H), 7.27 – 7.22 (m, 1H, Ar-H), 7.17 (d,  $J$  = 16.0 Hz, 1H, Ar(2-O)-C=CH), 7.05 (d,  $J$  = 16.1 Hz, 1H, Ar(2-Cl)-C=CH), 3.92 (s, 3H, CH<sub>3</sub>), 3.89 (s, 3H, CH<sub>3</sub>).  $^{13}\text{C}$  NMR (126 MHz,  $\text{CDCl}_3$ )  $\delta$  188.90, 161.81, 149.59, 149.54, 143.63, 136.24, 131.62, 130.30, 128.12, 127.47, 127.37, 126.80, 125.58, 123.45, 120.73, 114.55, 55.52, 55.32, 55.27.  $^{31}\text{P}$  NMR (162 MHz,  $\text{CDCl}_3$ )  $\delta$  -3.74. HRMS calcd for  $\text{C}_{19}\text{H}_{19}\text{ClO}_5\text{P}$   $[\text{M}+\text{H}]^+$  393.0653, found 393.0646.

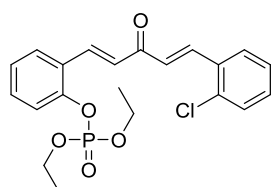

**Data for**

2-((1E,4E)-5-(2-chlorophenyl)-3-oxopenta-1,4-dien-1-yl)phenyl diethyl phosphate (**3f**): Yellow oil, yield 60%. <sup>1</sup>H NMR (500 MHz, CDCl<sub>3</sub>) δ 8.14 – 7.97 (m, 2H, Ar(2-Cl)-CH=, Ar(2-O)-CH=), 7.67 (dt, *J* = 8.7, 4.4 Hz, 2H, Ar-2H), 7.44 – 7.33 (m, 3H, Ar-3H), 7.28 (ddd, *J* = 6.9, 6.3, 3.2 Hz, 2H, Ar-2H), 7.18 (dd, *J* = 17.3, 9.5 Hz, 1H, Ar-H), 7.13 – 6.97 (m, 2H, Ar(2-O)-C=CH, Ar(2-Cl)-C=CH), 4.39 – 4.05 (m, 4H, 2CH<sub>2</sub>), 1.51 – 1.09 (m, 6H, 2CH<sub>3</sub>). <sup>13</sup>C NMR (126 MHz, CDCl<sub>3</sub>) δ 188.81, 149.82, 149.77, 139.19, 137.39, 135.44, 133.04, 131.84, 131.36, 130.35, 128.02, 127.93, 127.76, 127.24, 126.68, 126.54, 126.49, 125.45, 120.86, 65.10, 16.18. <sup>31</sup>P NMR (202 MHz, CDCl<sub>3</sub>) δ -5.97. HRMS calcd for C<sub>21</sub>H<sub>23</sub>ClO<sub>5</sub>P [M+H]<sup>+</sup> 421.096, found 421.0959.

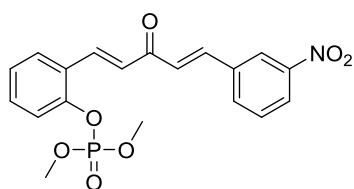

**Data for**

dimethyl

(2-((1E,4E)-5-(2-nitrophenyl)-3-oxopenta-1,4-dien-1-yl)phenyl) phosphate (**3g**): Yellow oil, yield 69%. <sup>1</sup>H NMR (400

MHz, CDCl<sub>3</sub>) δ 8.27 (d, *J* = 8.7 Hz, 2H, Ar-2H), 8.07 (d, *J* = 15.8, 5.9 Hz, 1H, Ar(2-OH)-CH=), 7.79 – 7.70 (m, 4H, Ar-3H, Ar(2-NO<sub>2</sub>)-CH=), 7.45 – 7.40 (m, 2H, Ar-2H), 7.25 (ddd, *J* = 9.2, 6.7, 2.6 Hz, 1H, Ar-2H), 7.23 – 7.17 (m, 1H, Ar(2-NO<sub>2</sub>)-C=CH), 7.16 – 7.11 (m, 1H, Ar(2-O)-C=CH), 3.93 (s, 3H, CH<sub>3</sub>), 3.90 (d, *J* = 3.2 Hz, 3H, CH<sub>3</sub>). <sup>13</sup>C NMR (101 MHz, CDCl<sub>3</sub>) δ 188.30, 149.66, 149.59, 148.54, 140.97, 140.41, 137.78, 128.95, 128.87, 128.16, 126.85, 126.37, 126.30, 125.66, 124.23, 120.80, 120.78, 55.29, 55.23. <sup>31</sup>P NMR (162 MHz, CDCl<sub>3</sub>) δ -5.01. HRMS calcd for C<sub>19</sub>H<sub>19</sub>NO<sub>7</sub>P [M+H]<sup>+</sup> 404.0893, found 404.0887.

**Data for**

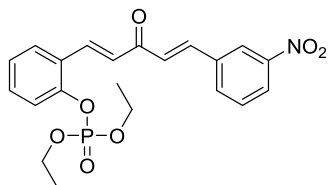

diethyl(2-((1E,4E)-5-(2-nitrophenyl)-3-oxopenta-1,4-dien-1-yl)phenyl) phosphate (**3h**): Yellow solid, m.p. 86-87 °C, yield 65%.

<sup>1</sup>H NMR (400 MHz, CDCl<sub>3</sub>) δ 8.26 (d, *J* = 8.8 Hz, 2H, Ar-2H), 8.07 (d, *J* = 16.2 Hz, 1H, Ar(2-OH)-CH=), 7.80 – 7.72 (m, 3H, Ar-2H, Ar(2-NO<sub>2</sub>)-CH=), 7.70 (d, *J* = 7.8 Hz, 1H, Ar-H), 7.46 – 7.37 (m, 2H, Ar-2H), 7.26 – 7.17 (m, 2H, Ar-2H, Ar(2-NO<sub>2</sub>)-C=CH), 7.12 (d, *J* = 16.1 Hz, 1H, Ar(2-O)-C=CH), 4.32 –

4.19 (m, 4H, 2CH<sub>2</sub>), 1.36 (td, *J* = 7.1, 1.0 Hz, 6H, 2CH<sub>3</sub>). <sup>13</sup>C NMR (101 MHz, CDCl<sub>3</sub>) δ 188.33, 149.89, 149.81, 148.55, 141.04, 140.26, 138.05, 131.96, 128.90, 128.76, 128.09, 126.87, 126.39, 126.33, 125.42, 124.20, 120.94, 65.01, 64.94, 16.16, 16.10. <sup>31</sup>P NMR (162 MHz, CDCl<sub>3</sub>) δ -6.40. HRMS calcd for C<sub>21</sub>H<sub>23</sub>NO<sub>7</sub>P [M+H]<sup>+</sup> 432.1206, found 432.1199.

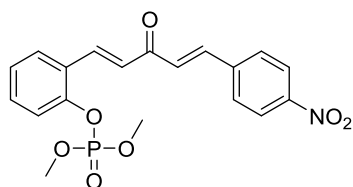

**Data for**

dimethyl(2-(((1E,4E)-5-(4-nitrophenyl)-3-oxopenta-1,4-dien-1-yl)phenyl) phosphate (**3i**): Yellow solid, m.p. 119-120 °C, yield 53%. <sup>1</sup>H NMR (500 MHz, CDCl<sub>3</sub>) δ 8.48 – 8.40 (m, 1H, Ar-H), 8.23 – 8.18 (m, 1H, Ar-H), 8.04 (d, *J* = 16.1 Hz, 1H, Ar-H), 7.87 (d, *J* = 7.0 Hz, 1H, Ar-H), 7.71 (dd, *J* = 24.1, 12.2 Hz, 2H, Ar-2H), 7.58 (t, *J* = 8.0 Hz, 1H, Ar(2-OH)-CH=), 7.38 (d, *J* = 3.6 Hz, 2H, Ar-H, Ar(4-NO<sub>2</sub>)-CH=), 7.18 (d, *J* = 15.9 Hz, 2H, Ar(4-NO<sub>2</sub>)-C=CH), 7.09 (d, *J* = 16.1 Hz, 1H, Ar(2-O)-C=CH), 3.90 (s, 3H, CH<sub>3</sub>), 3.87 (s, 3H, CH<sub>3</sub>). <sup>13</sup>C NMR (126 MHz, CDCl<sub>3</sub>) δ 188.35, 149.64, 148.74, 140.55, 137.62, 136.61, 134.33, 132.11, 130.18, 128.11, 127.69, 127.02, 126.41, 125.69, 124.75, 122.44, 120.85, 55.36, 55.31. <sup>31</sup>P NMR (202 MHz, CDCl<sub>3</sub>) δ -6.63. HRMS calcd for C<sub>19</sub>H<sub>19</sub>NO<sub>7</sub>P [M+H]<sup>+</sup> 404.0893, found 404.0887.

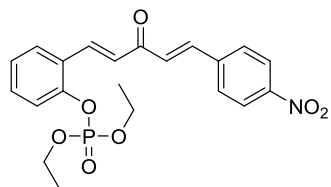

**Data for**

diethyl(2-(((1E,4E)-5-(4-nitrophenyl)-3-oxopenta-1,4-dien-1-yl)phenyl) phosphate (**3j**): Yellow solid, m.p. 100-101 °C, yield 58%. <sup>1</sup>H NMR (400 MHz, CDCl<sub>3</sub>) δ 8.48 (s, 1H, Ar-H), 8.25 (d, *J* = 8.2 Hz, 1H, Ar-H), 8.08 (d, *J* = 16.2 Hz, 1H, Ar(2-OH)-CH=), 7.91 (d, *J* = 7.7 Hz, 1H, Ar-H), 7.77 (d, *J* = 16.0 Hz, 1H, Ar(4-NO<sub>2</sub>)-CH=), 7.71 (d, *J* = 7.8 Hz, 1H, Ar-H), 7.62 (t, *J* = 8.0 Hz, 1H, Ar-H), 7.48 – 7.38 (m, 2H, Ar-2H), 7.27 – 7.19 (m, 2H, Ar-H, Ar(2-O)-C=CH), 7.12 (d, *J* = 16.1 Hz, 1H, Ar(4-NO<sub>2</sub>)-C=CH), 4.34 – 4.20 (m, 4H, 2CH<sub>2</sub>), 1.40 – 1.33 (m, 6H, 2CH<sub>3</sub>). <sup>13</sup>C NMR (101 MHz, CDCl<sub>3</sub>) δ 188.33, 149.85, 148.74, 140.38, 137.85, 136.62, 134.13, 131.91, 130.06, 128.03, 127.62, 126.96, 126.40, 125.41, 124.61, 122.39, 120.93, 65.02, 64.96, 16.15, 16.09. <sup>31</sup>P NMR (162 MHz, CDCl<sub>3</sub>) δ -7.04. HRMS calcd for C<sub>21</sub>H<sub>23</sub>NO<sub>7</sub>P [M+H]<sup>+</sup> 432.1206, found 432.1198.

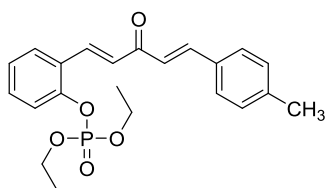

**Data for**

diethyl (2-((1E,4E)-3-oxo-5-(p-tolyl)penta-1,4-dien-1-yl)phenyl) phosphate (**3k**): Yellow oil, yield 50%. <sup>1</sup>H NMR (400 MHz, CDCl<sub>3</sub>) δ 8.10 – 8.00 (m, 2H, Ar(2-OH)-CH=, Ar-H), 7.71 (d, *J* = 7.8 Hz, 1H, Ar-H), 7.60 (dd, *J* = 7.7, 1.5 Hz, 1H, Ar-H), 7.45 (d, *J* = 8.3 Hz, 1H, Ar(4-CH<sub>3</sub>)-CH=), 7.40 – 7.34 (m, 2H, Ar-2H), 7.18 (td, *J* = 16.2, 10.6 Hz, 3H, Ar-3H), 7.01 – 6.91 (m, 2H, Ar(4-CH<sub>3</sub>)-C=CH, Ar(2-O)-C=CH), 4.30 – 4.21 (m, 4H, 2CH<sub>2</sub>), 3.92 (s, 3H, CH<sub>3</sub>), 1.38 – 1.31 (m, 6H, 2CH<sub>3</sub>). <sup>13</sup>C NMR (101 MHz, CDCl<sub>3</sub>) δ 189.43, 158.69, 149.71, 149.64, 138.96, 136.43, 131.83, 131.43, 128.97, 127.88, 127.20, 126.79, 126.11, 125.27, 123.71, 120.80, 111.25, 64.97, 64.91, 55.52, 16.13, 16.06. <sup>31</sup>P NMR (162 MHz, CDCl<sub>3</sub>) δ -6.41. HRMS calcd for C<sub>22</sub>H<sub>26</sub>O<sub>3</sub>P [M+H]<sup>+</sup> 401.1512, found 401.1497.

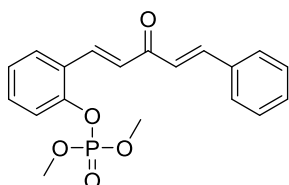

**Data for**

dimethyl (2-((1E,4E)-3-oxo-5-phenylpenta-1,4-dien-1-yl)phenyl) phosphate (**3l**): Yellow oil, yield 42%. <sup>1</sup>H NMR (400 MHz, CDCl<sub>3</sub>) δ 8.03 (d, *J* = 16.1 Hz, 1H, Ar(2-OH)-CH=), 7.68 (t, *J* = 10.9 Hz, 2H, Ar-2H), 7.53 (d, *J* = 6.9 Hz, 2H, Ar-1H, Ar-CH=), 7.46 (d, *J* = 7.2 Hz, 2H, Ar-2H), 7.40 (d, *J* = 6.2 Hz, 2H, Ar-2H), 7.22 (m, 4.2 Hz, 1H, Ar-H), 7.11 (d, *J* = 16.1 Hz, 1H, Ar-C=CH), 7.05 (d, *J* = 16.0 Hz, 1H, Ar(2-OH)-C=CH), 3.91 (s, 3H, CH<sub>3</sub>), 3.88 (s, 3H, CH<sub>3</sub>). <sup>13</sup>C NMR (101 MHz, CDCl<sub>3</sub>) δ 188.88, 149.59, 149.52, 143.63, 136.65, 134.74, 131.65, 130.60, 129.00, 128.40, 128.09, 127.14, 126.65, 126.58, 125.54, 120.70, 120.68, 55.20, 55.14. <sup>31</sup>P NMR (162 MHz, CDCl<sub>3</sub>) δ -5.03. HRMS calcd for C<sub>19</sub>H<sub>20</sub>O<sub>3</sub>P [M+H]<sup>+</sup> 359.1042, found 359.1030.

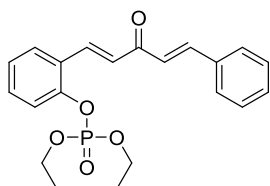

**Data for**

diethyl (2-((1E,4E)-3-oxo-5-phenylpenta-1,4-dien-1-yl)phenyl) phosphate (**3m**): Yellow solid, m.p. 70-71 °C, yield 65%. <sup>1</sup>H NMR (400 MHz, CDCl<sub>3</sub>) δ 8.04 (d, *J* = 16.1 Hz, 1H, Ar(2-OH)-CH=), 7.75 (d, *J* = 16.0 Hz, 1H, Ar-H), 7.70 (d, *J* = 7.8 Hz, 1H, Ar-H), 7.61 (dd, *J* = 9.5, 3.7 Hz, 2H, Ar-H),

Ar-CH=), 7.47 – 7.36 (m, 5H, Ar-5H), 7.25 – 7.20 (m, 1H, Ar-H), 7.13 (d,  $J = 10.8$  Hz, 1H, Ar-C=CH), 7.09 (d,  $J = 10.7$  Hz, 1H, Ar(2-O)-C=CH), 4.31 – 4.19 (m, 4H, 2CH<sub>2</sub>), 1.39 – 1.31 (m, 6H, 2CH<sub>3</sub>). <sup>13</sup>C NMR (101 MHz, CDCl<sub>3</sub>)  $\delta$  188.99, 149.78, 149.71, 143.54, 136.95, 134.79, 131.59, 130.56, 128.99, 128.39, 128.00, 127.18, 126.65, 126.59, 125.33, 120.84, 120.82, 64.97, 64.91, 16.15, 16.09. <sup>31</sup>P NMR (162 MHz, CDCl<sub>3</sub>)  $\delta$  -6.18. HRMS calcd for C<sub>21</sub>H<sub>24</sub>O<sub>5</sub>P [M+H]<sup>+</sup> 387.1355, found 387.1346.

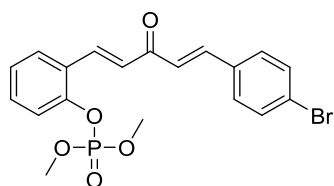

**Data for**

2-((1E,4E)-5-(4-bromophenyl)-3-oxopenta-1,4-dien-1-yl)phenyl dimethyl phosphate (**3n**): Yellow oil, yield 71%. <sup>1</sup>H NMR (400 MHz, CDCl<sub>3</sub>)  $\delta$  8.03 (d,  $J = 16.1$  Hz, 1H, Ar(2-OH)-CH=), 7.68 (t,  $J = 10.9$  Hz, 2H, Ar-2H), 7.53 (d,  $J = 6.9$  Hz, 2H, Ar-2H), 7.46 (d,  $J = 7.2$  Hz, 2H, Ar-H, Ar-(4-Br)-CH=), 7.42 – 7.36 (m, 2H, Ar-2H), 7.22 (dd,  $J = 9.7, 4.2$  Hz, 1H, Ar-H), 7.11 (d,  $J = 16.1$  Hz, 1H, Ar-(4-Br)-C=CH), 7.05 (d,  $J = 16.0$  Hz, 1H, Ar(2-O)-C=CH), 3.91 (s, 3H, CH<sub>3</sub>), 3.88 (s, 3H, CH<sub>3</sub>). <sup>13</sup>C NMR (101 MHz, CDCl<sub>3</sub>)  $\delta$  188.61, 149.60, 149.53, 142.15, 136.92, 133.69, 132.23, 131.74, 129.74, 128.09, 127.06, 126.56, 126.50, 125.98, 125.53, 124.83, 120.70, 55.21, 55.15. <sup>31</sup>P NMR (162 MHz, CDCl<sub>3</sub>)  $\delta$  -4.50. HRMS calcd for C<sub>19</sub>H<sub>19</sub>BrO<sub>5</sub>P [M+H]<sup>+</sup> 437.0148, found 437.0134.

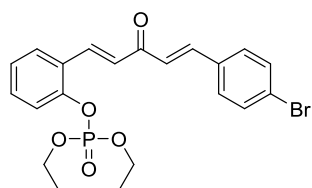

**Data for**

2-((1E,4E)-5-(4-bromophenyl)-3-oxopenta-1,4-dien-1-yl)phenyl diethyl phosphate (**3o**): Yellow solid, m.p.79-80 °C, yield 68%. <sup>1</sup>H NMR (500 MHz, CDCl<sub>3</sub>)  $\delta$  8.05 (d,  $J = 16.1$  Hz, 1H, Ar(2-OH)-CH=), 7.74 – 7.66 (m, 2H, Ar-2H), 7.56 (d,  $J = 8.5$  Hz, 2H, Ar-H, Ar-(4-Br)-CH=), 7.49 (d,  $J = 8.4$  Hz, 2H, Ar-2H), 7.45 (d,  $J = 9.4$  Hz, 1H, Ar-H), 7.43 – 7.39 (m, 1H, Ar-H), 7.24 (m, 1H, Ar-H), 7.12 (d,  $J = 12.1$  Hz, 1H, Ar-(4-Br)-C=CH), 7.09 (d,  $J = 12.0$  Hz, 1H, Ar(2-O)-C=CH), 4.31 – 4.23 (m, 4H, 2CH<sub>2</sub>), 1.40 – 1.34 (m, 6H, 2CH<sub>3</sub>). <sup>13</sup>C NMR (126 MHz, CDCl<sub>3</sub>)  $\delta$  188.80, 149.87, 149.82, 142.15, 137.32, 133.81, 132.31, 131.76, 131.75, 128.10, 127.18, 126.64, 126.59, 125.86, 125.42, 124.88, 120.94, 65.04, 64.99, 16.22, 16.17. <sup>31</sup>P NMR



(202 MHz, CDCl<sub>3</sub>)  $\delta$  -3.42. HRMS calcd for C<sub>21</sub>H<sub>23</sub>BrO<sub>5</sub>P [M+H]<sup>+</sup> 465.0461, found 465.0451.

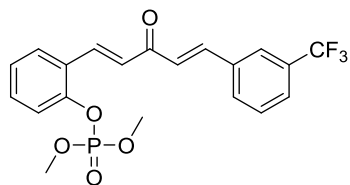

**Data for**

dimethyl(2-((1E,4E)-3-oxo-5-(3-(trifluoromethyl)phenyl)pent-1,4-dien-1-yl)phenyl) phosphate (**3p**): Yellow solid, m.p.

65-66 °C, yield 63%. <sup>1</sup>H NMR (400 MHz, CDCl<sub>3</sub>)  $\delta$  8.07 (d, *J* = 16.1 Hz, 1H, Ar(2-OH)-CH=), 7.87 (s, 1H, Ar-H), 7.77 (s, 1H, Ar-(3-CF<sub>3</sub>)-CH=), 7.73 (d, *J* = 5.3 Hz, 1H, Ar-H), 7.66 (d, *J* = 7.6 Hz, 1H, Ar-H), 7.58 – 7.52 (m, 2H, Ar-2H), 7.42 (s, 2H, Ar-2H), 7.14 (dd, *J* = 16.0, 1.5 Hz, 3H, Ar-H, Ar(2-O)-C=CH, Ar-(3-CF<sub>3</sub>)-C=CH), 3.92 (s, 3H, CH<sub>3</sub>), 3.90 (s, 3H, CH<sub>3</sub>). <sup>13</sup>C NMR (101 MHz, CDCl<sub>3</sub>)  $\delta$  188.54, 149.62, 149.56, 141.61, 137.28, 135.58, 131.90, 131.58, 129.59, 128.03, 127.02, 126.80, 125.58, 125.17, 124.66, 124.63, 120.78, 120.76, 55.23, 55.17. <sup>31</sup>P NMR (162 MHz, CDCl<sub>3</sub>)  $\delta$  -4.78. HRMS calcd for C<sub>20</sub>H<sub>19</sub>F<sub>3</sub>O<sub>5</sub>P [M+H]<sup>+</sup> 427.0916, found 427.0914.

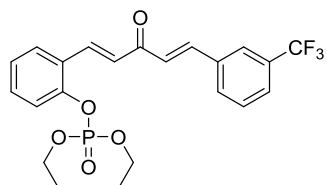

**Data for**

diethyl(2-((1E,4E)-3-oxo-5-(3-(trifluoromethyl)phenyl)pent-1,4-dien-1-yl)phenyl) phosphate (**3q**): Yellow oil, yield 72%. <sup>1</sup>H

NMR (400 MHz, CDCl<sub>3</sub>)  $\delta$  8.07 (d, *J* = 16.2 Hz, 1H, Ar(2-OH)-CH=), 7.87 (s, 1H, Ar-H), 7.77 (dd, *J* = 11.8, 8.7 Hz, 2H, Ar-(3-CF<sub>3</sub>)-CH=, Ar-H), 7.71 (d, *J* = 7.8 Hz, 1H, Ar-H), 7.66 (d, *J* = 7.8 Hz, 1H, Ar-2=H), 7.56 (d, *J* = 8.0 Hz, 1H, Ar-H), 7.47 – 7.40 (m, 2H, Ar-2H), 7.24 (t, *J* = 7.2 Hz, 1H, Ar-H), 7.17 (d, *J* = 16.0 Hz, 1H, Ar(2-O)-C=CH), 7.11 (d, *J* = 16.1 Hz, 1H, Ar-(3-CF<sub>3</sub>)-C=CH), 4.30 – 4.22 (m, 4H, 2CH<sub>2</sub>), 1.39 – 1.34 (m, 6H, 2CH<sub>3</sub>). <sup>13</sup>C NMR (101 MHz, CDCl<sub>3</sub>)  $\delta$  188.63, 149.82, 149.75, 141.55, 137.57, 135.62, 131.84, 131.57, 129.57, 128.00, 127.03, 126.67, 126.40, 125.39, 124.66, 124.63, 120.92, 120.90, 65.01, 64.95, 16.15, 16.09. <sup>31</sup>P NMR (162 MHz, CDCl<sub>3</sub>)  $\delta$  -7.27. HRMS calcd for C<sub>22</sub>H<sub>23</sub>F<sub>3</sub>O<sub>5</sub>P [M+H]<sup>+</sup> 455.1229, found 455.1223.

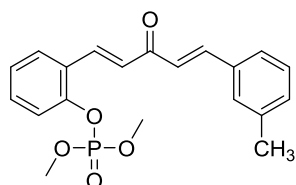

**Data for**

dimethyl (2-((1E,4E)-3-oxo-5-(p-tolyl)penta-1,4-dien-1-yl)phenyl) phosphate (**3r**): Yellow oil, yield 69%. <sup>1</sup>H NMR (400 MHz, CDCl<sub>3</sub>) δ 8.03 (d, *J* = 16.1 Hz, 1H, Ar(2-OH)-CH=), 7.71 (dd, *J* = 11.9, 7.1 Hz, 2H, Ar-2H), 7.44 – 7.36 (m, 4H, Ar-(3-CH<sub>3</sub>)-CH=, Ar-3H), 7.30 (dd, *J* = 12.4, 4.3 Hz, 1H, Ar-H), 7.22 (d, *J* = 7.6 Hz, 2H, Ar-2H), 7.14 (d, *J* = 16.0 Hz, 1H, Ar(2-O)-C=CH), 7.06 (d, *J* = 16.0 Hz, 1H, Ar-(3-CH<sub>3</sub>)-C=CH), 3.92 (s, 3H, CH<sub>3</sub>), 3.89 (s, 3H, CH<sub>3</sub>), 2.39 (s, 3H, CH<sub>3</sub>). <sup>13</sup>C NMR (101 MHz, CDCl<sub>3</sub>) δ 188.91, 149.49, 143.87, 138.66, 136.54, 134.66, 131.65, 131.50, 129.06, 128.90, 128.05, 127.12, 126.65, 126.58, 125.65, 125.52, 125.37, 120.69, 55.23, 21.36. <sup>31</sup>P NMR (162 MHz, CDCl<sub>3</sub>) δ -4.15. HRMS calcd for C<sub>20</sub>H<sub>22</sub>O<sub>5</sub>P [M+H]<sup>+</sup> 373.1199, found 373.1195.

#### Data for

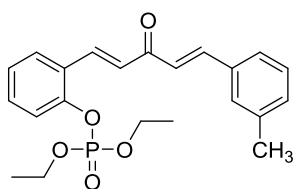

diethyl(2-((1E,4E)-3-oxo-5-(m-tolyl)penta-1,4-dien-1-yl)phenyl) phosphate (**3s**): Yellow oil, yield 65%. <sup>1</sup>H NMR (400 MHz, CDCl<sub>3</sub>) δ 8.04 (d, *J* = 16.1 Hz, 1H, Ar(2-OH)-CH=), 7.71 (dd, *J* = 11.8, 9.8 Hz, 2H, Ar-H, Ar-(3-CH<sub>3</sub>)-CH=), 7.46 – 7.36 (m, 4H, Ar-4H), 7.32 – 7.27 (m, 1H, Ar-H), 7.22 (ddd, *J* = 7.1, 5.4, 1.4 Hz, 2H, Ar-2H), 7.10 (m, 12.4 Hz, 2H, Ar(2-O)-C=CH, Ar-(3-CH<sub>3</sub>)-C=CH), 4.30 – 4.22 (m, 4H, 2CH<sub>2</sub>), 2.39 (s, 3H, CH<sub>3</sub>), 1.38 – 1.32 (m, 6H, 2CH<sub>3</sub>). <sup>13</sup>C NMR (101 MHz, CDCl<sub>3</sub>) δ 189.00, 149.74, 143.77, 138.64, 136.81, 134.70, 131.59, 131.45, 129.04, 128.88, 127.97, 127.17, 126.64, 125.64, 125.33, 125.16, 120.79, 64.99, 64.93, 21.36, 16.17, 16.10. <sup>31</sup>P NMR (162 MHz, CDCl<sub>3</sub>) δ -7.30. HRMS calcd for C<sub>22</sub>H<sub>26</sub>O<sub>5</sub>P [M+H]<sup>+</sup> 401.1512, found 401.1510.

3. Spectrogram of title compounds 3a-3s

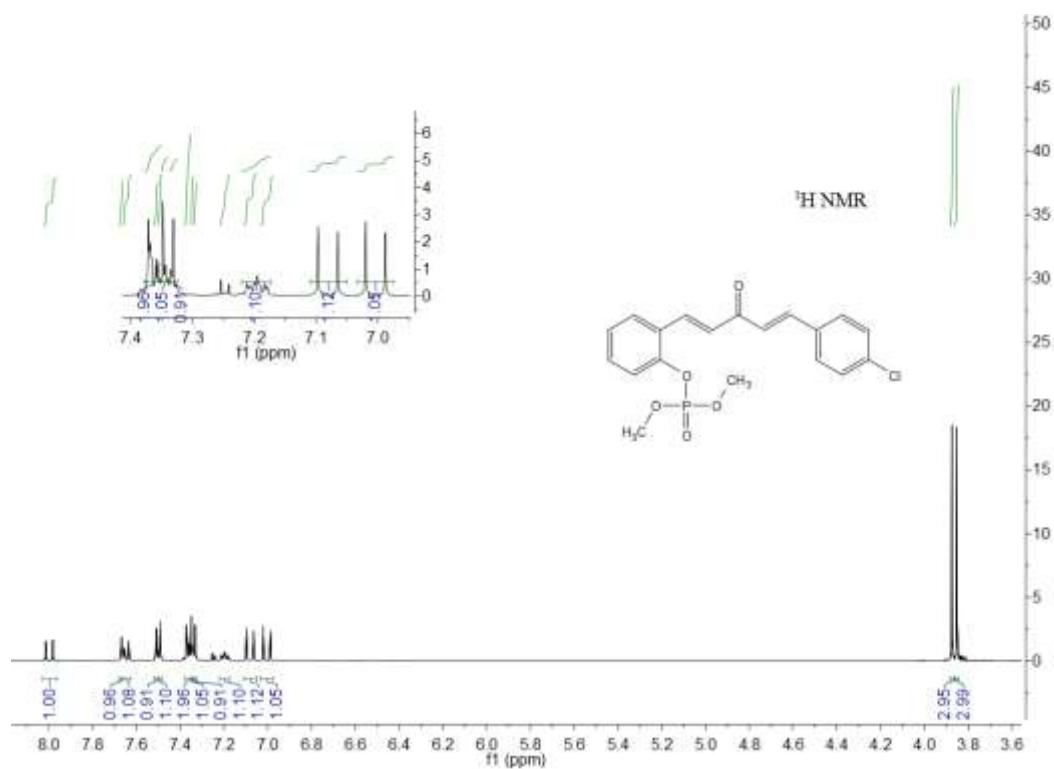

<sup>1</sup>H NMR of compound 3a

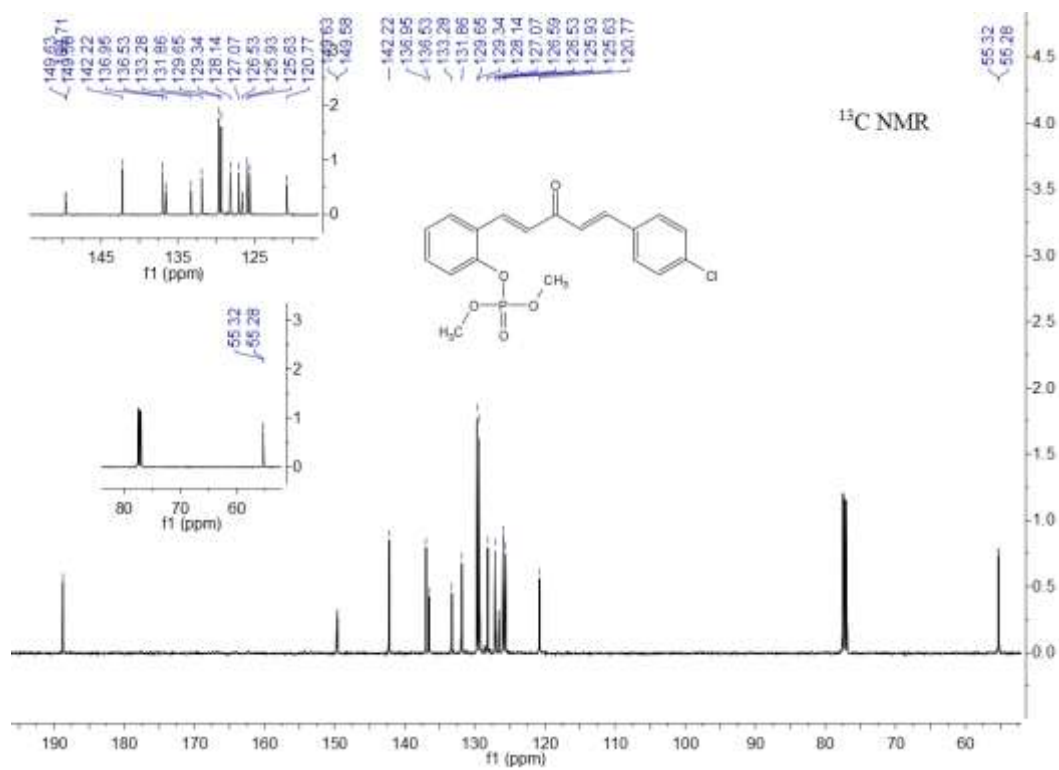

<sup>13</sup>C NMR of compound 3a

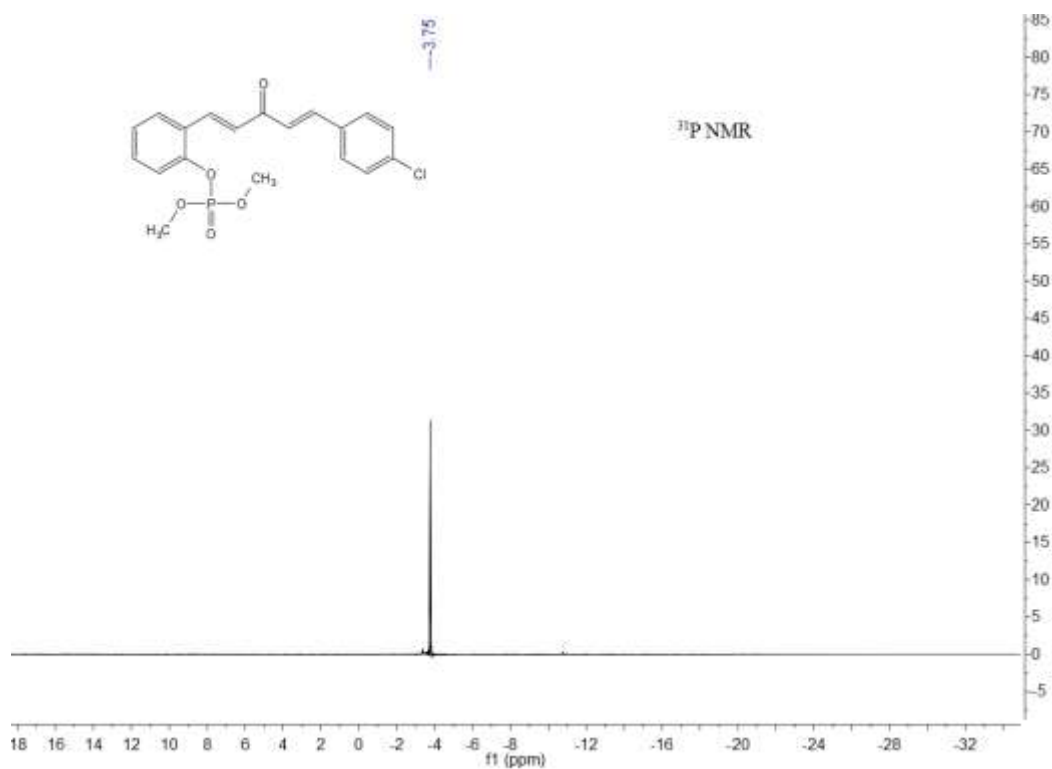

**<sup>31</sup>P NMR of compound **3a****

2017110704 #105 RT: 1.02 AV: 1 NL: 7.72E7  
T: FTMS + p ESI Full ms [100.0000-1000.0000]

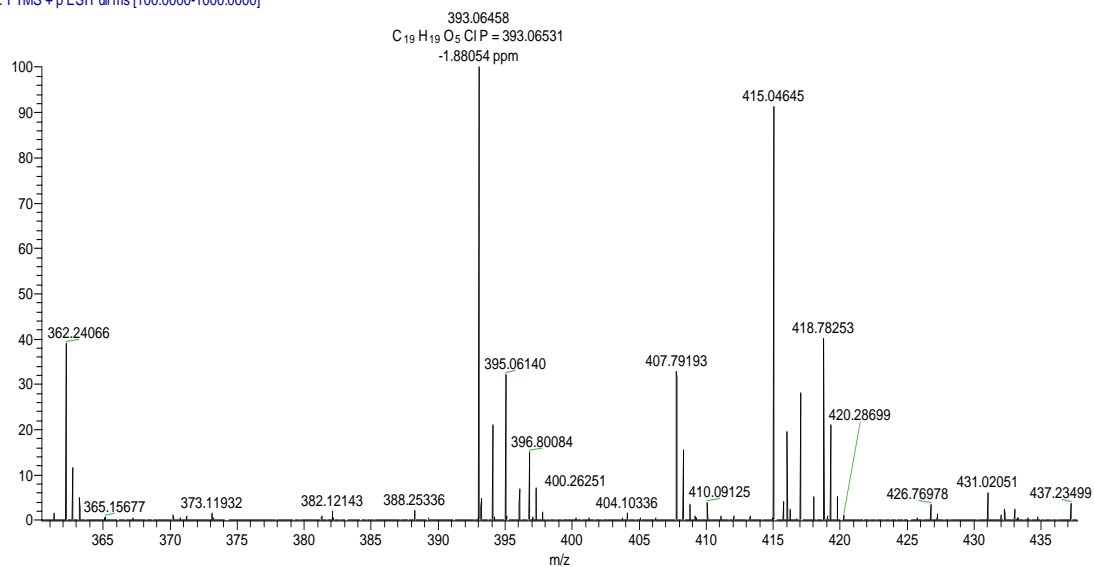

**HRMS of compound **3a****

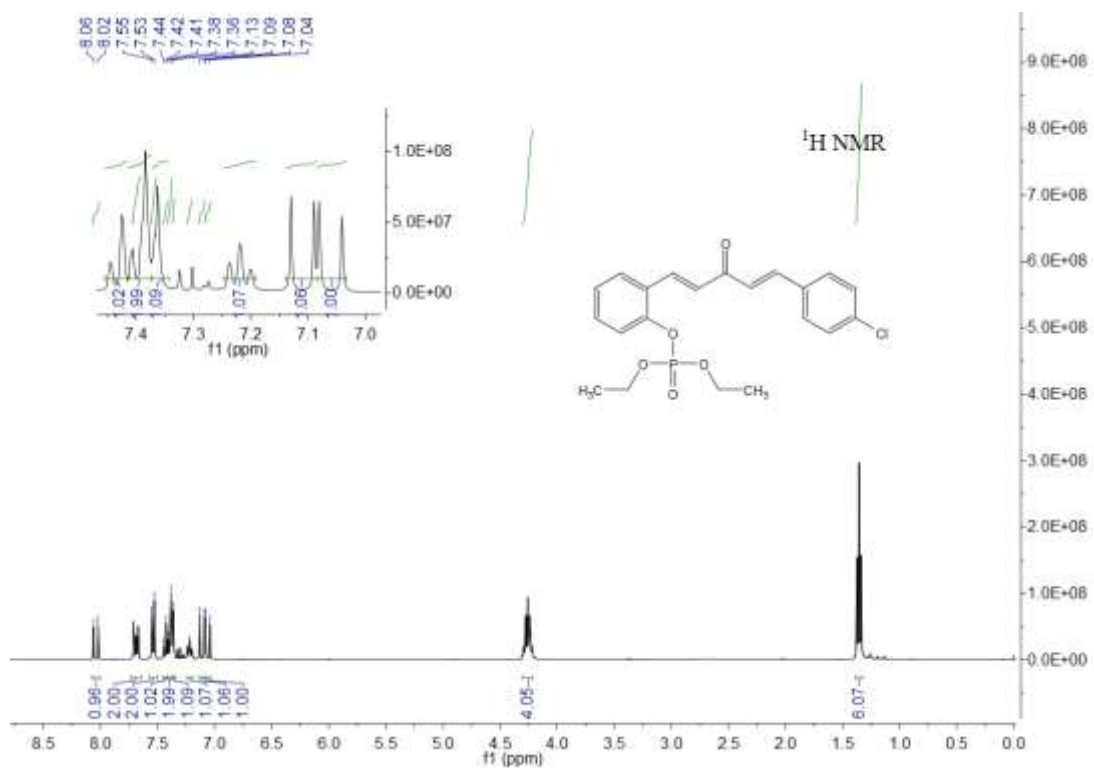

<sup>1</sup>H NMR of compound **3b**

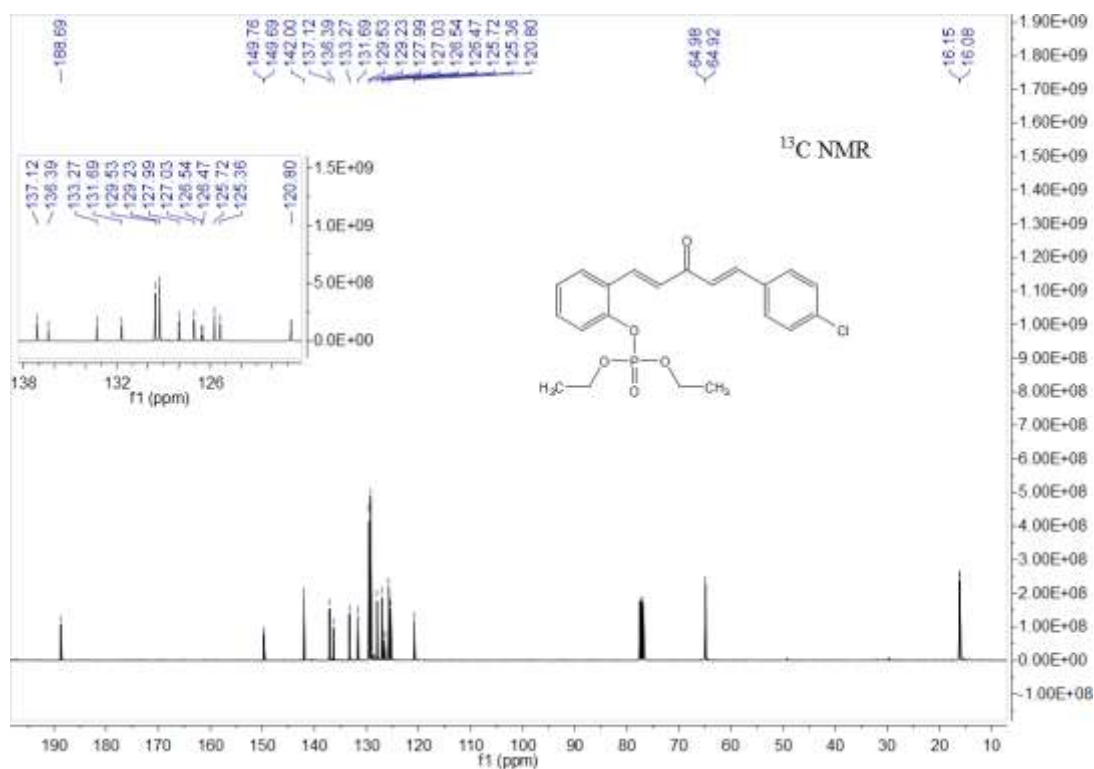

<sup>13</sup>C NMR of compound **3b**

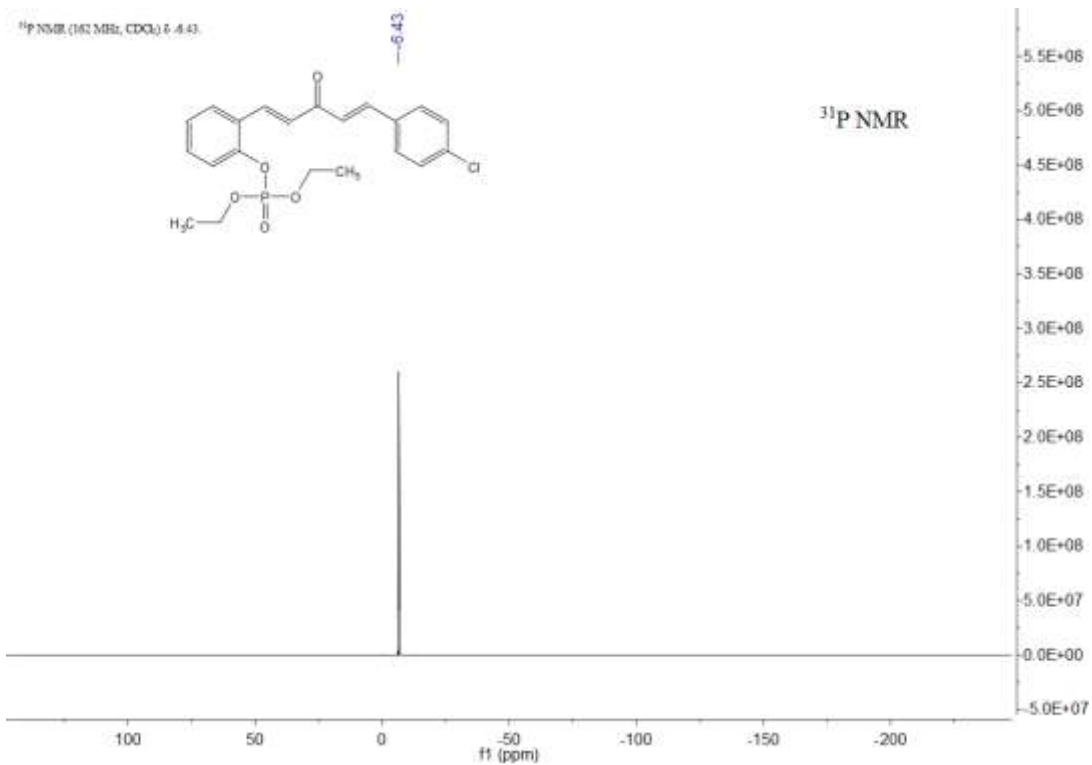

<sup>31</sup>P NMR of compound **3b**

2017110778 #115 RT: 1.12 AV: 1 NL: 1.12E8  
T: FTMS + p ESI Full ms [100.0000-1000.0000]

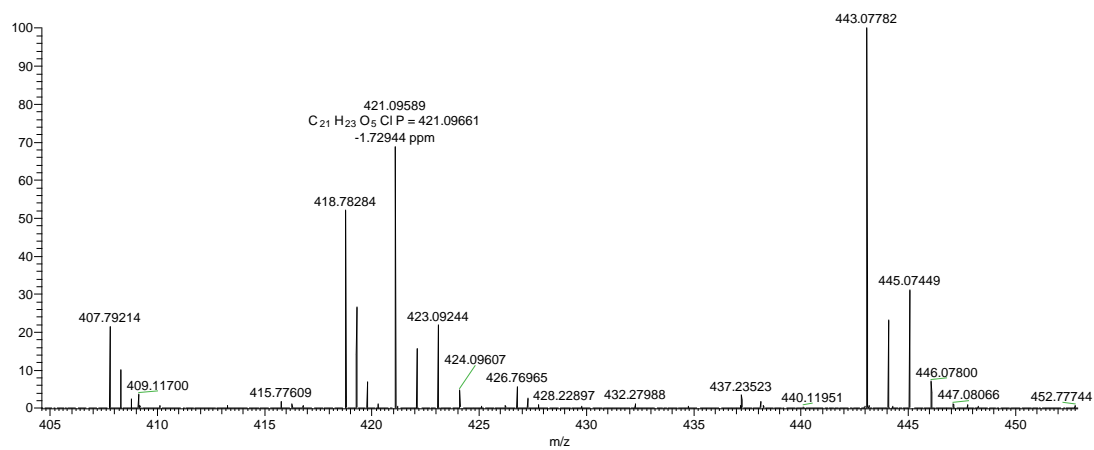

HRMS of compound **3b**

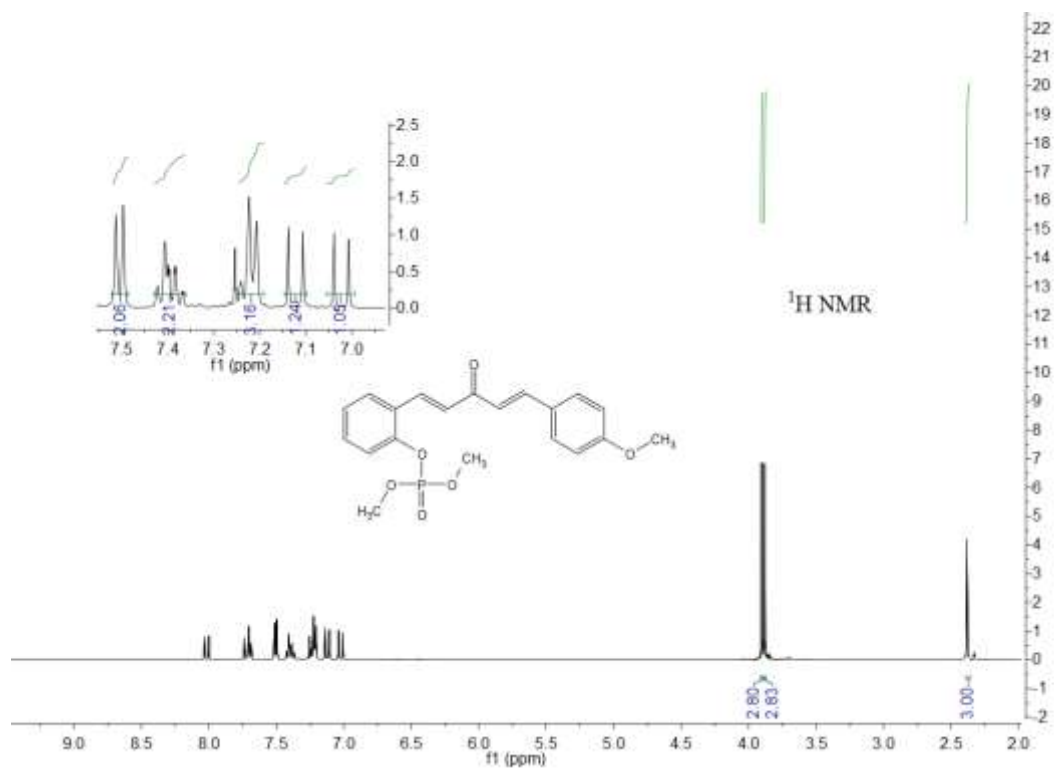

<sup>1</sup>H NMR of compound **3c**

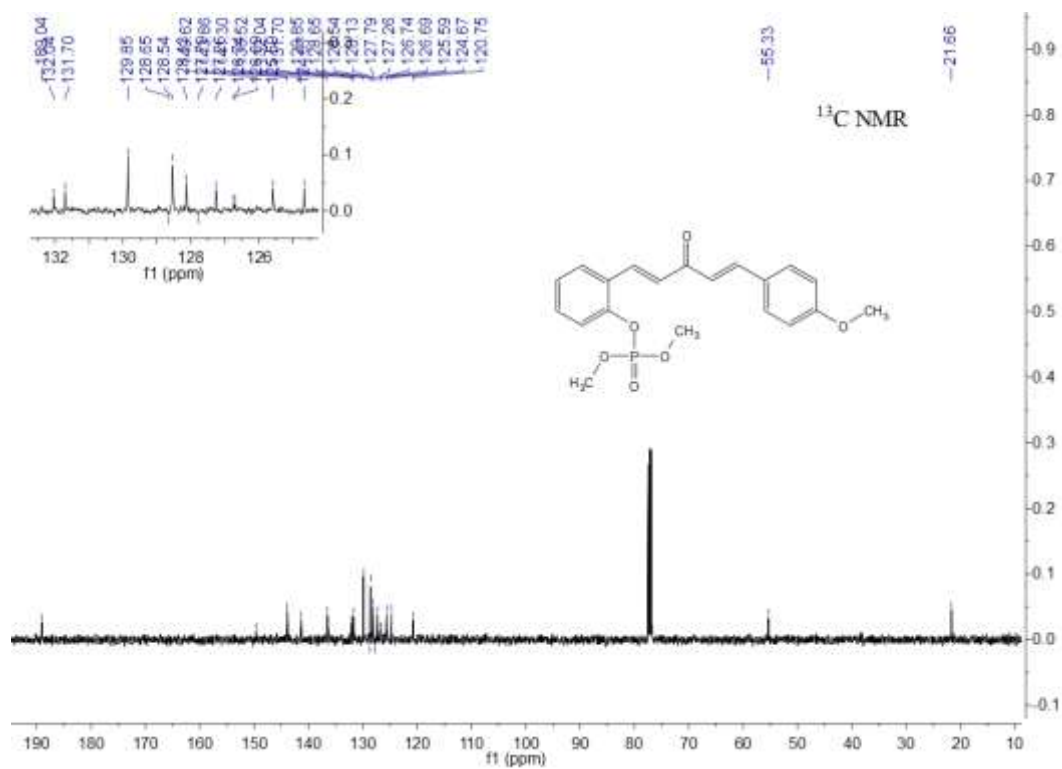

<sup>13</sup>C NMR of compound **3c**

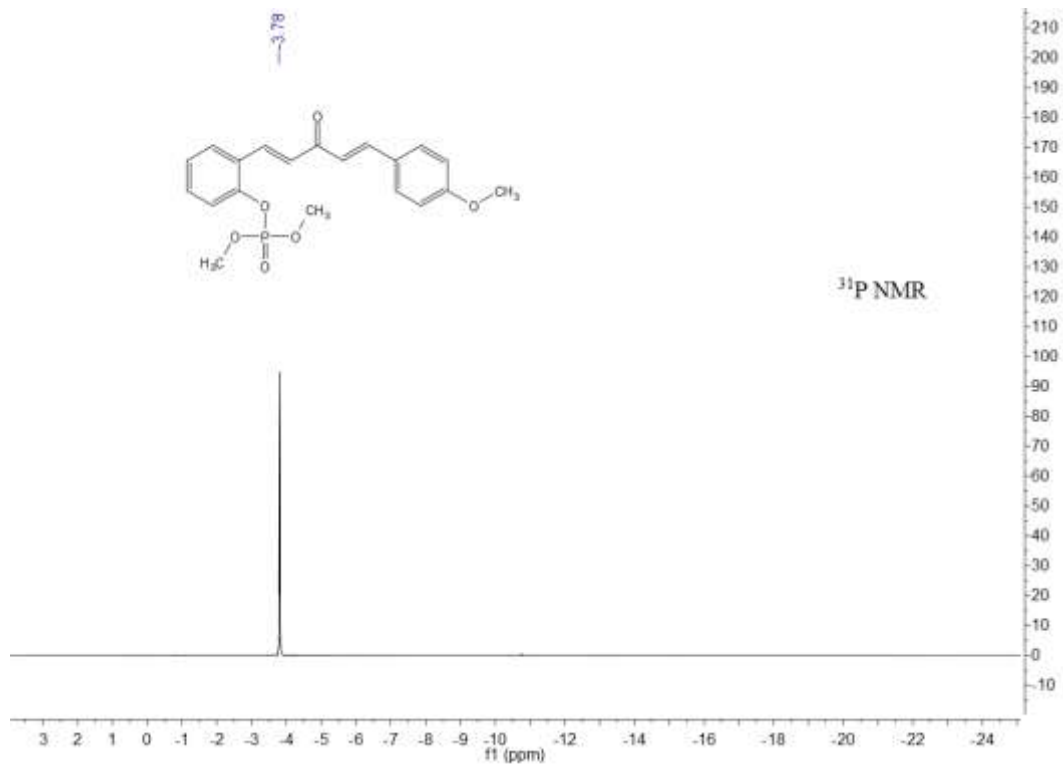

<sup>31</sup>P NMR of compound 3c

2017111422 #97 RT: 0.93 AV: 1 NL: 1.76E6  
T: FTMS + p ESI Full ms [100.0000-1000.0000]

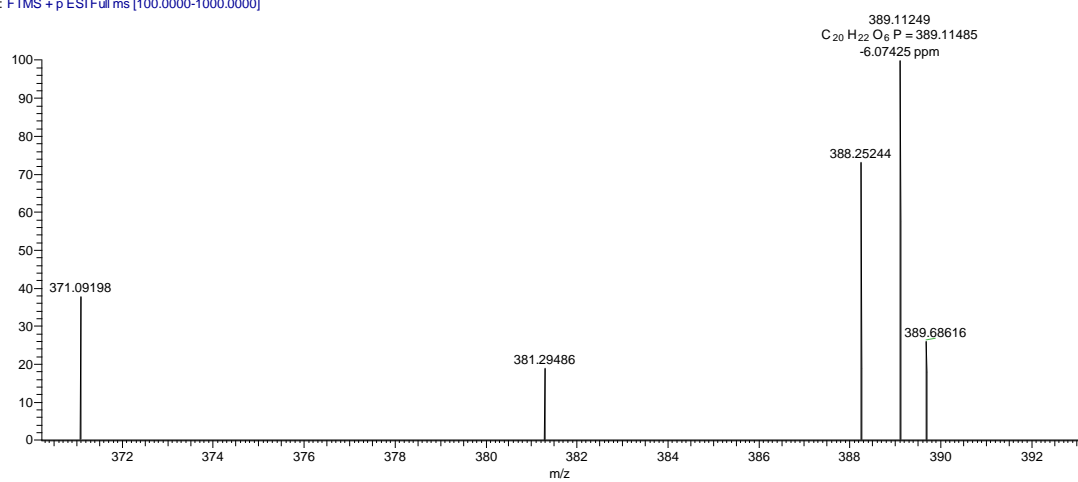



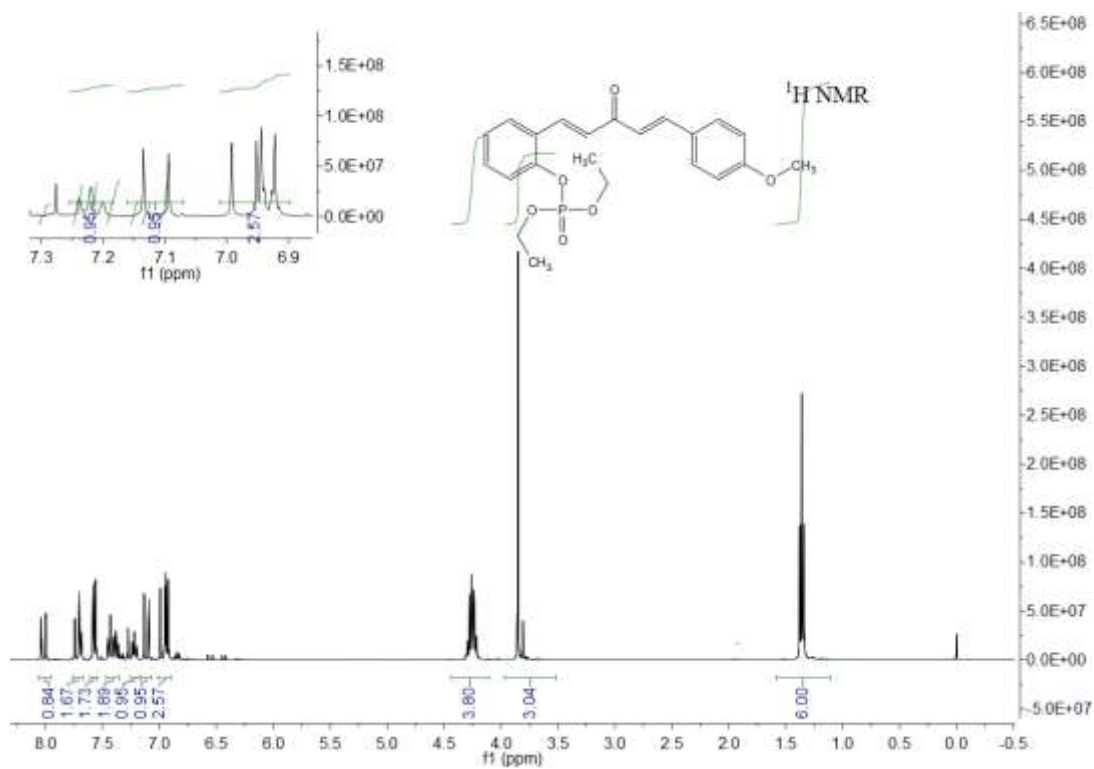

<sup>1</sup>H NMR of compound **3d**

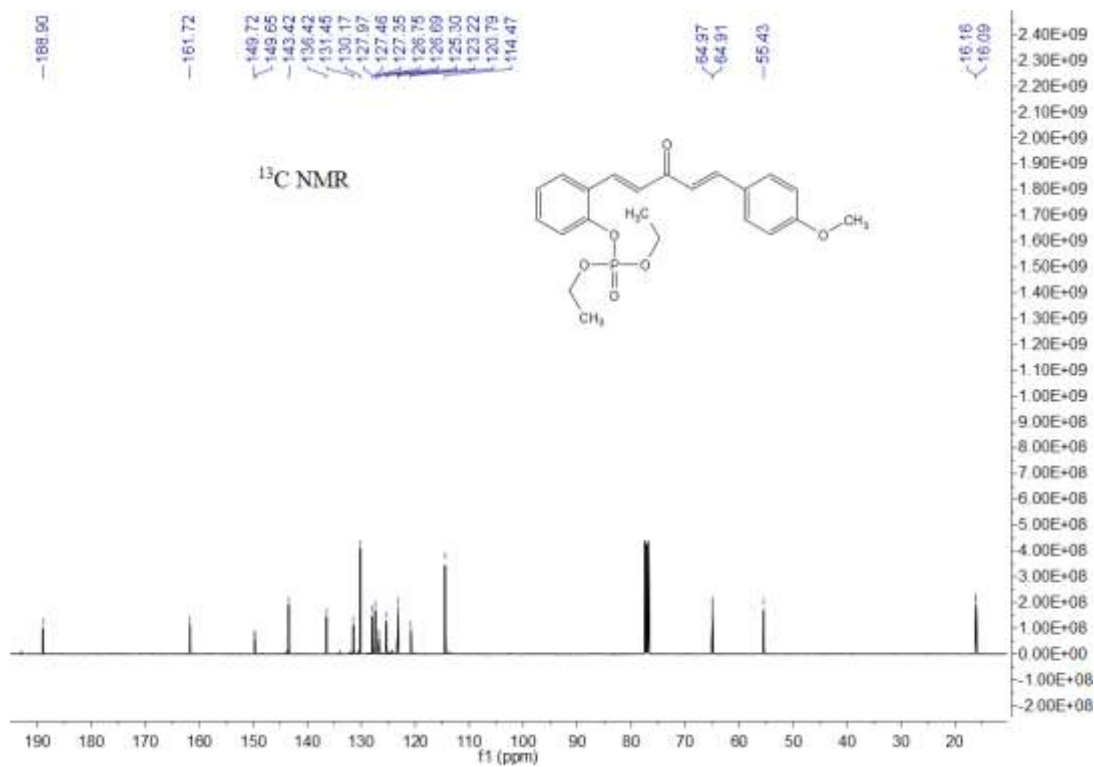

<sup>13</sup>C NMR of compound **3d**

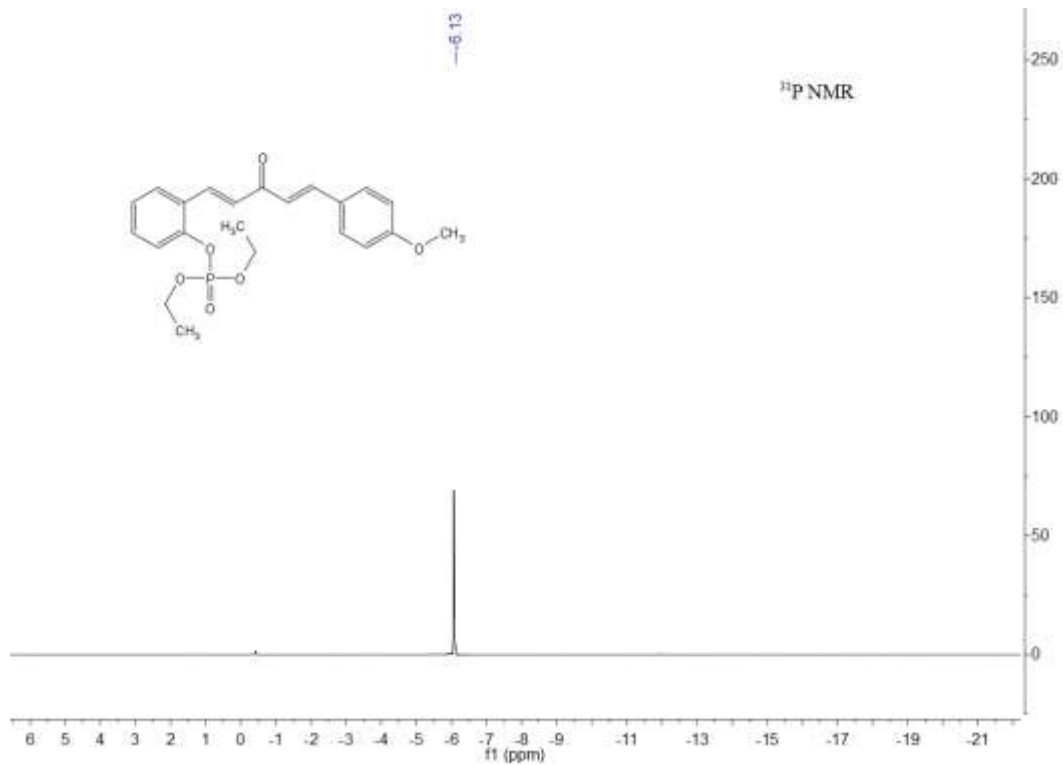

<sup>31</sup>P NMR of compound 3d

2017111423 #101 RT: 0.97 AV: 1 NL: 6.34E8  
T: FTMS + p ESI Full ms [100.0000-1000.0000]

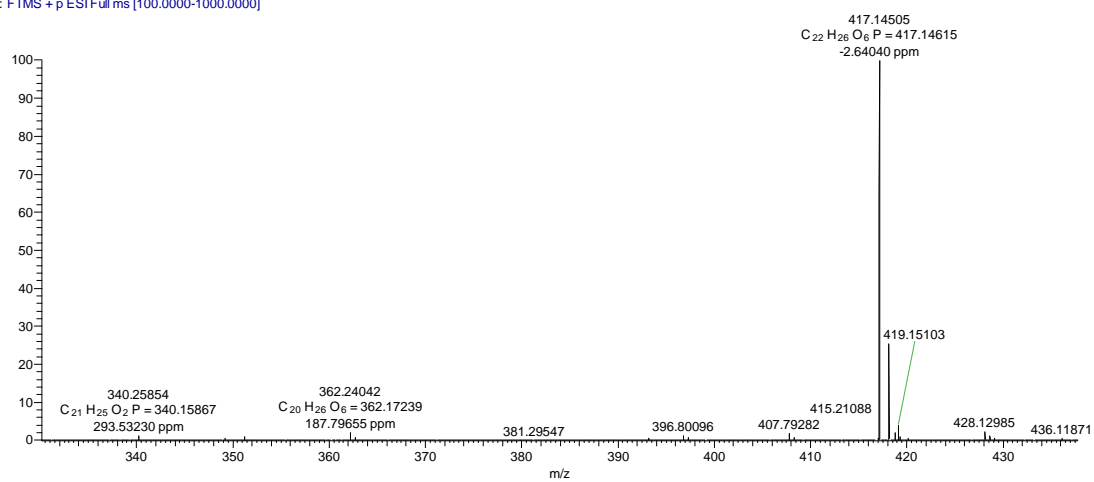

HRMS of compound 3d

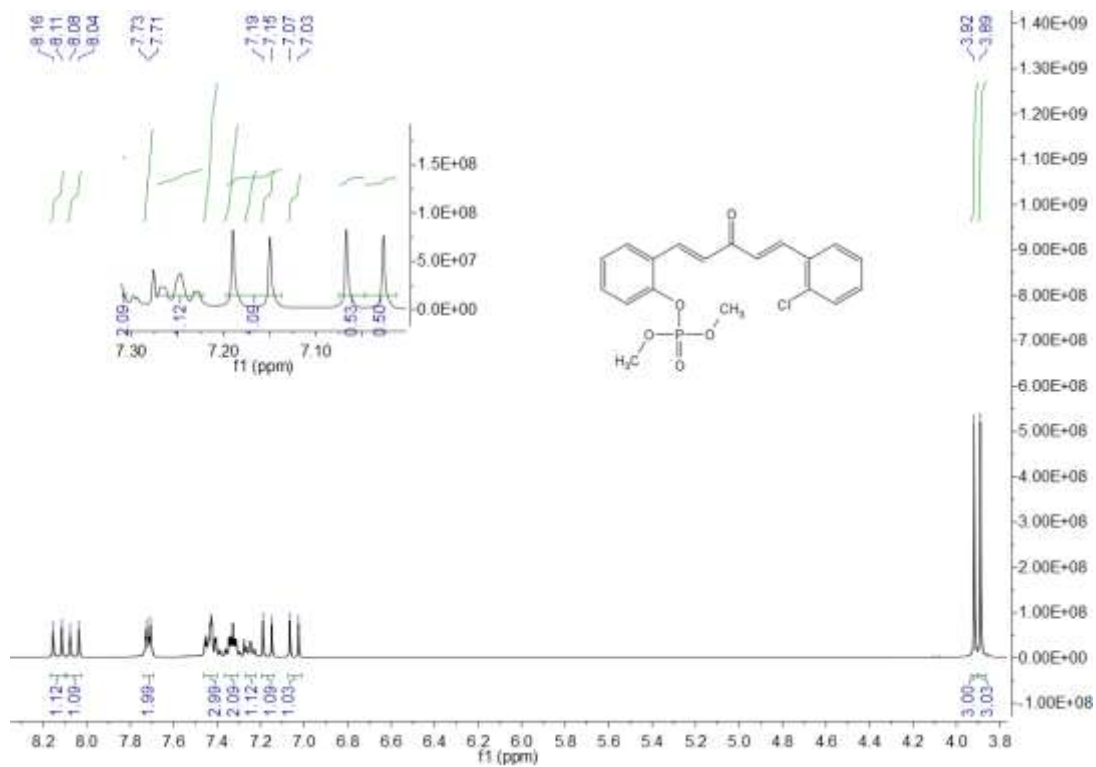

<sup>1</sup>H NMR of compound 3e

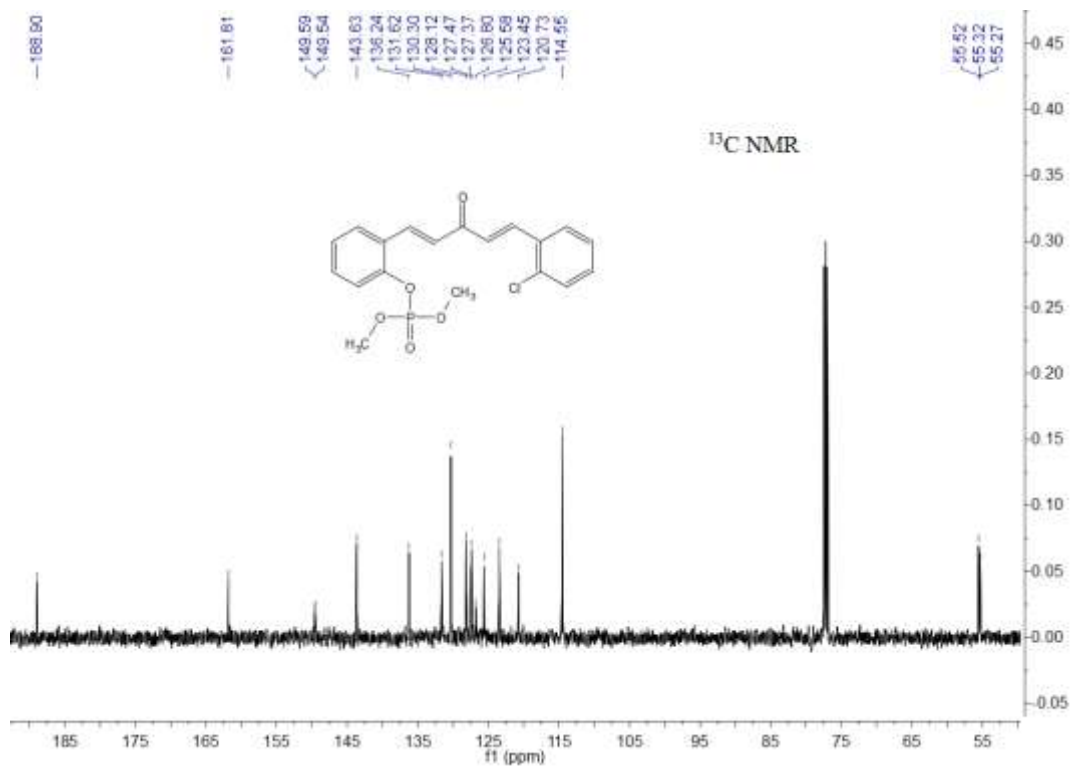

<sup>13</sup>C NMR of compound 3e

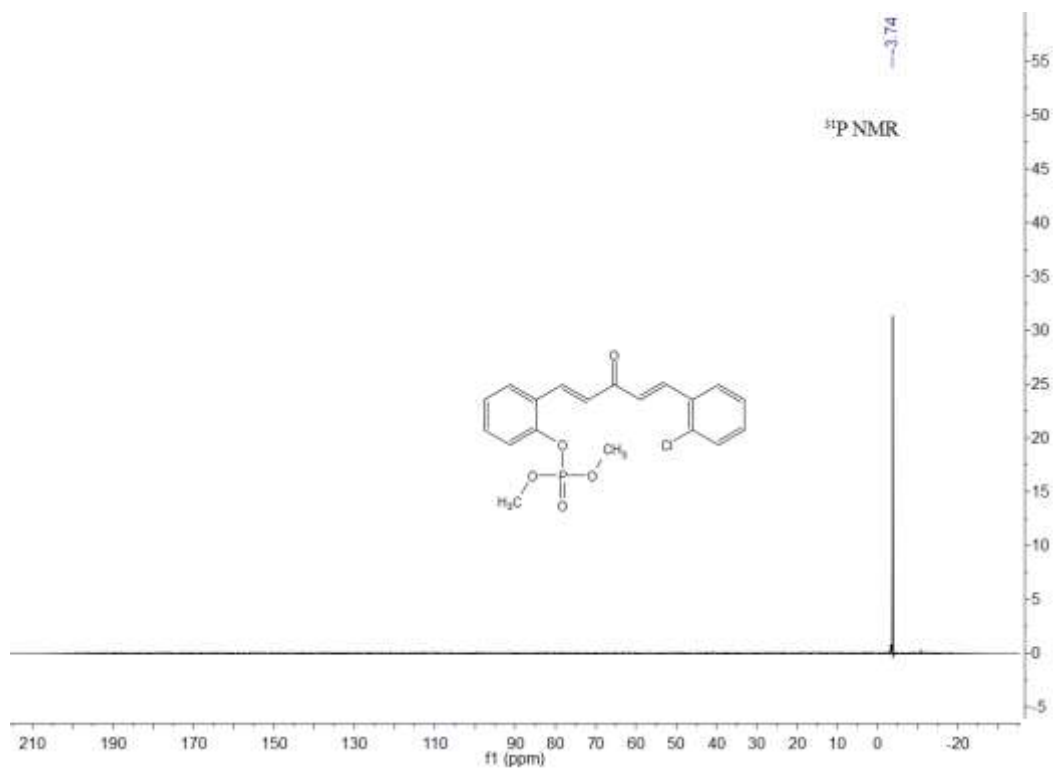

<sup>31</sup>P NMR of compound **3e**

2018050838 #97 RT: 0.94 AV: 1 NL: 1.25E9  
T: FTMS + p ESI Full ms [100.0000-1000.0000]

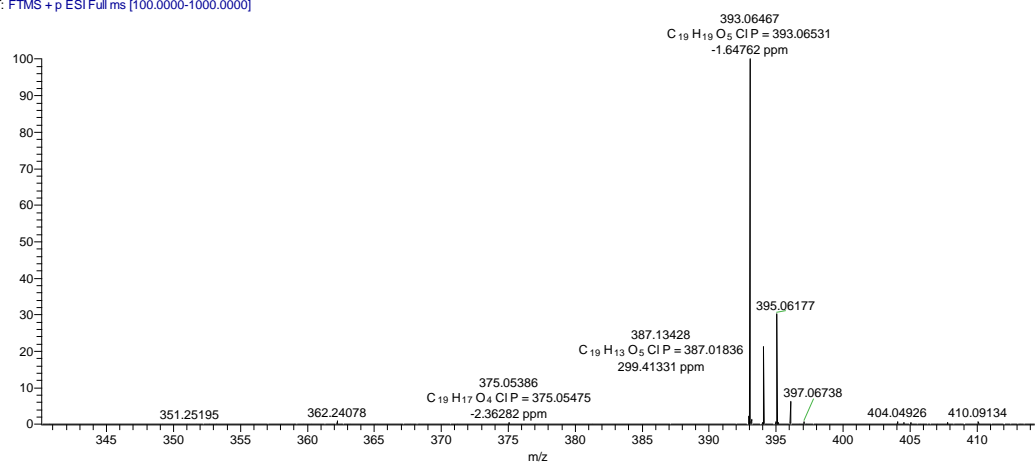

HRMS of compound **3e**

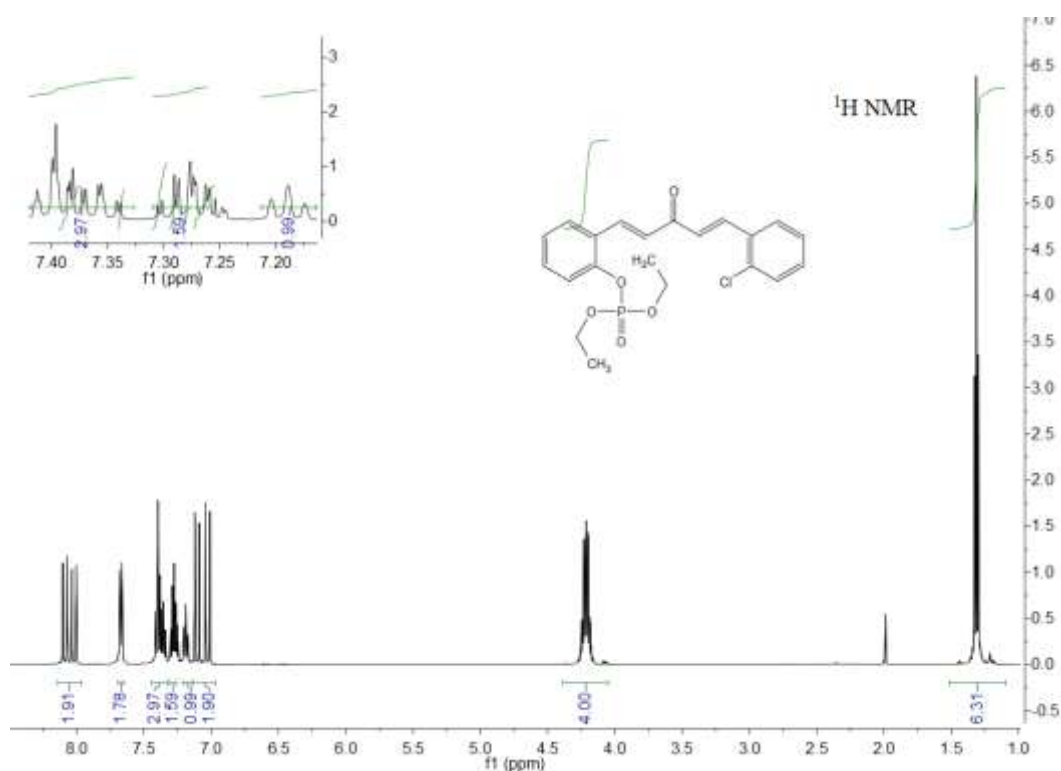

$^1\text{H NMR}$  of compound **3f**

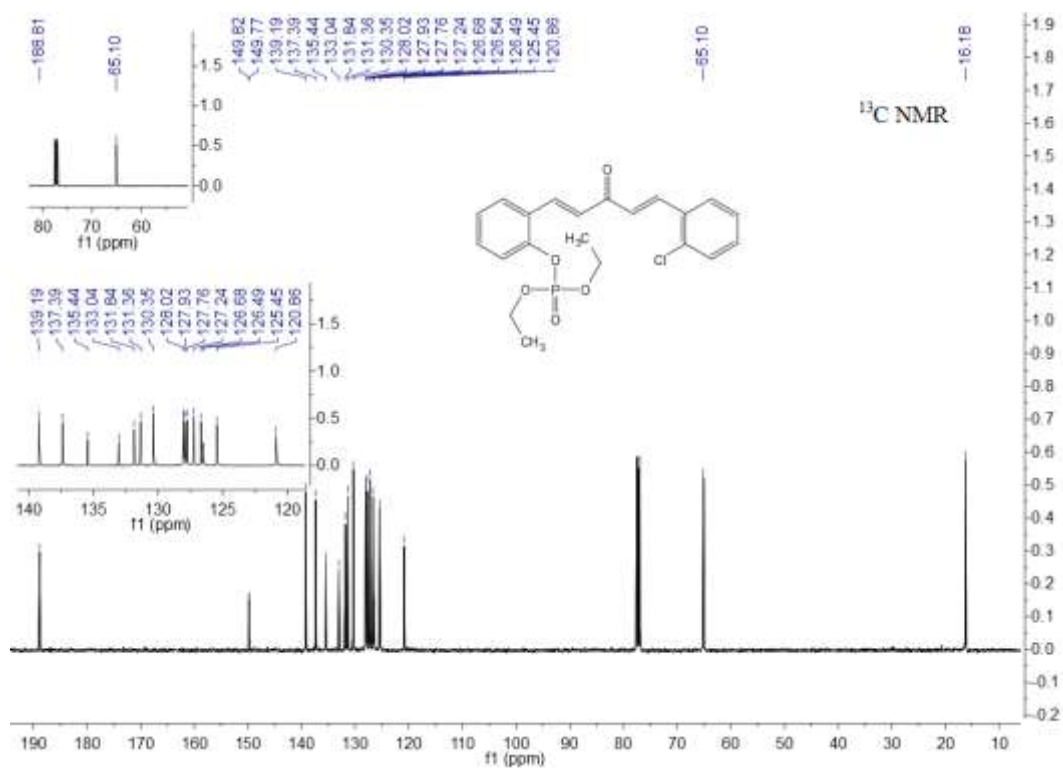

$^{13}\text{C NMR}$  of compound **3f**

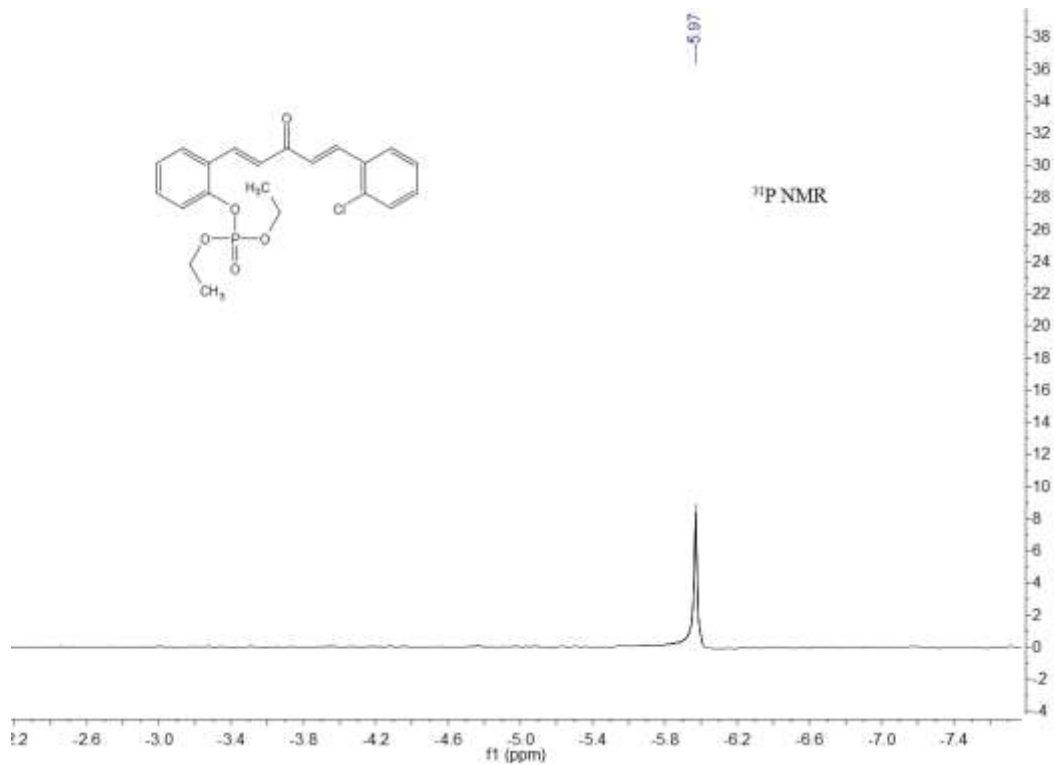

<sup>31</sup>P NMR of compound **3f**

2018050839 #119 RT: 1.15 AV: 1 NL: 6.11E8  
T: FTMS + p ESI Full ms [100.0000-1000.0000]

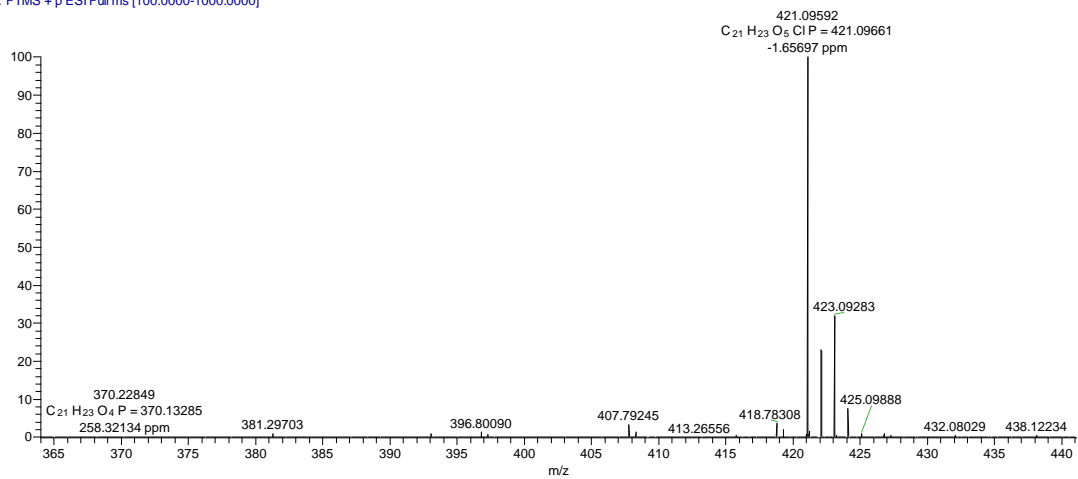

HRMS of compound **3f**

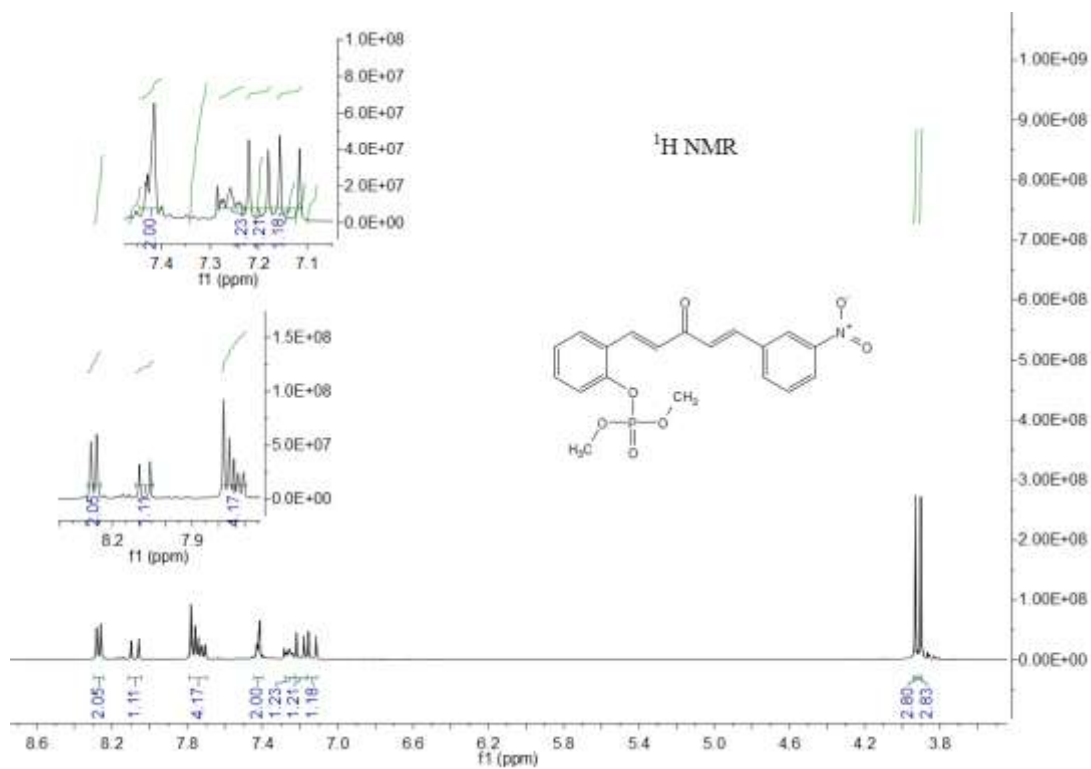

<sup>1</sup>H NMR of compound **3g**

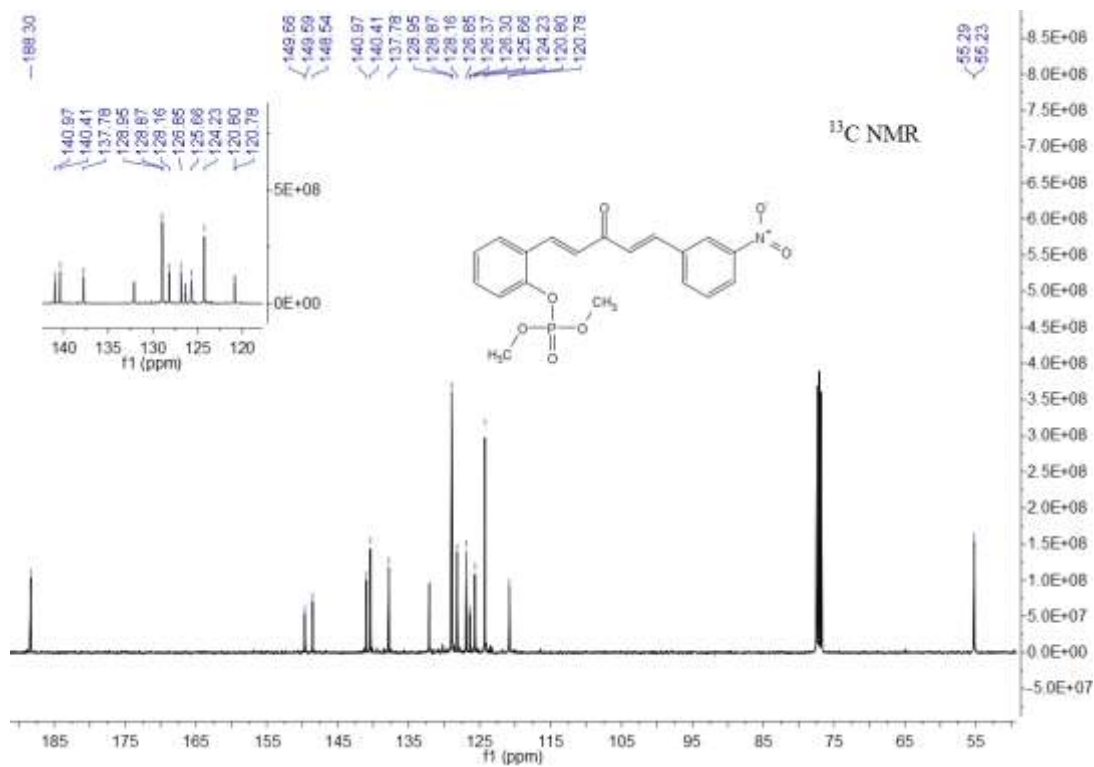

<sup>13</sup>C NMR of compound **3g**

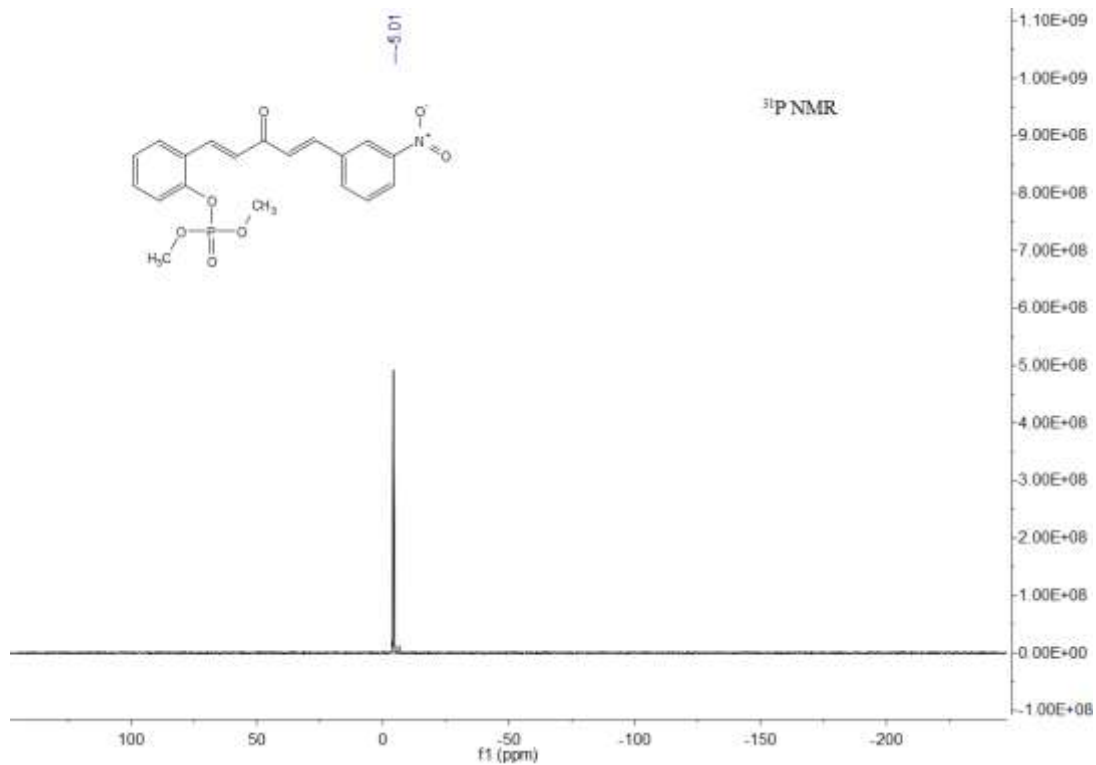

<sup>31</sup>P NMR of compound **3g**

2018050840 #91 RT: 0.88 AV: 1 NL: 2.70E8  
T: FTMS + p ESI Full ms [100.0000-1000.0000]

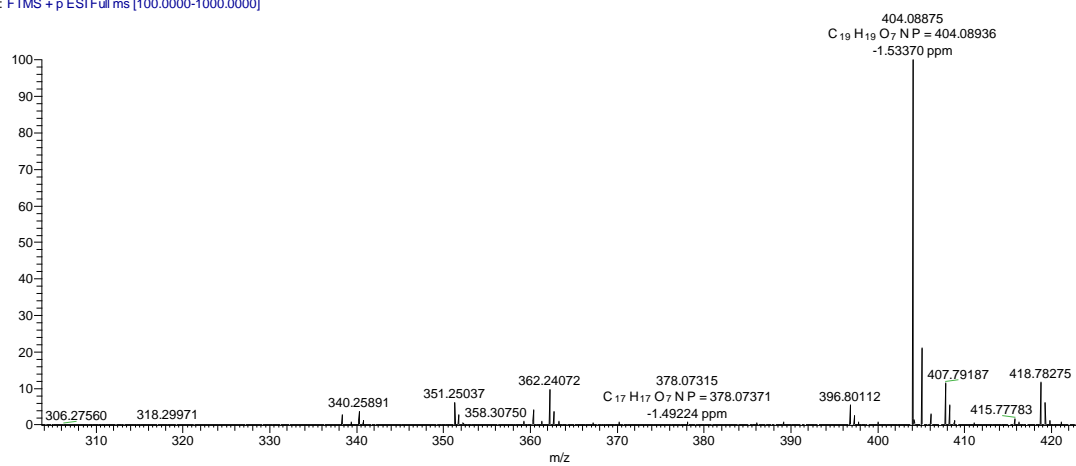

HRMS of compound **3g**



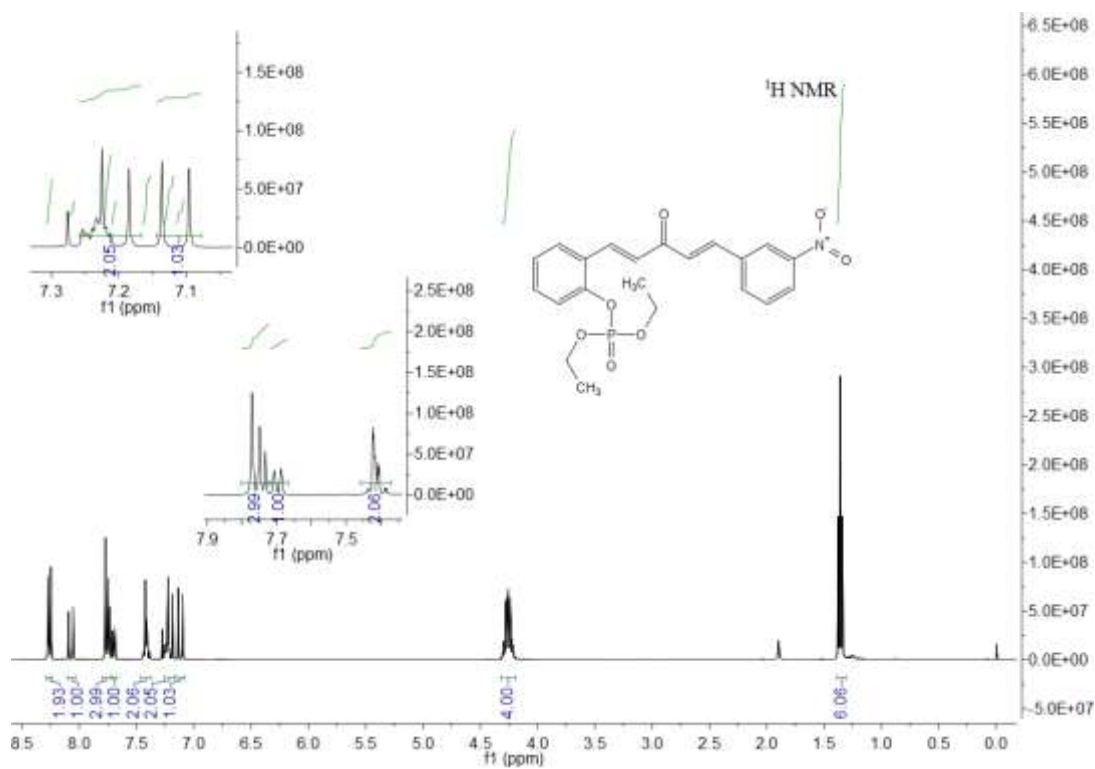

<sup>1</sup>H NMR of compound **3h**

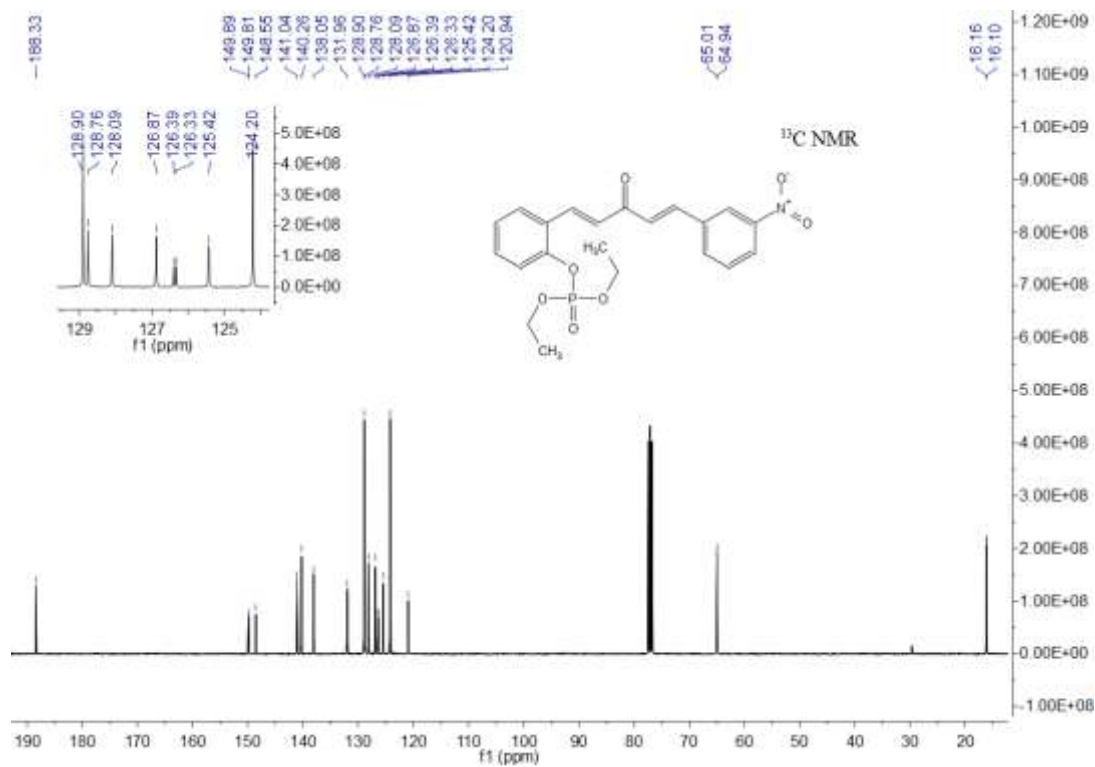

<sup>13</sup>C NMR of compound **3h**

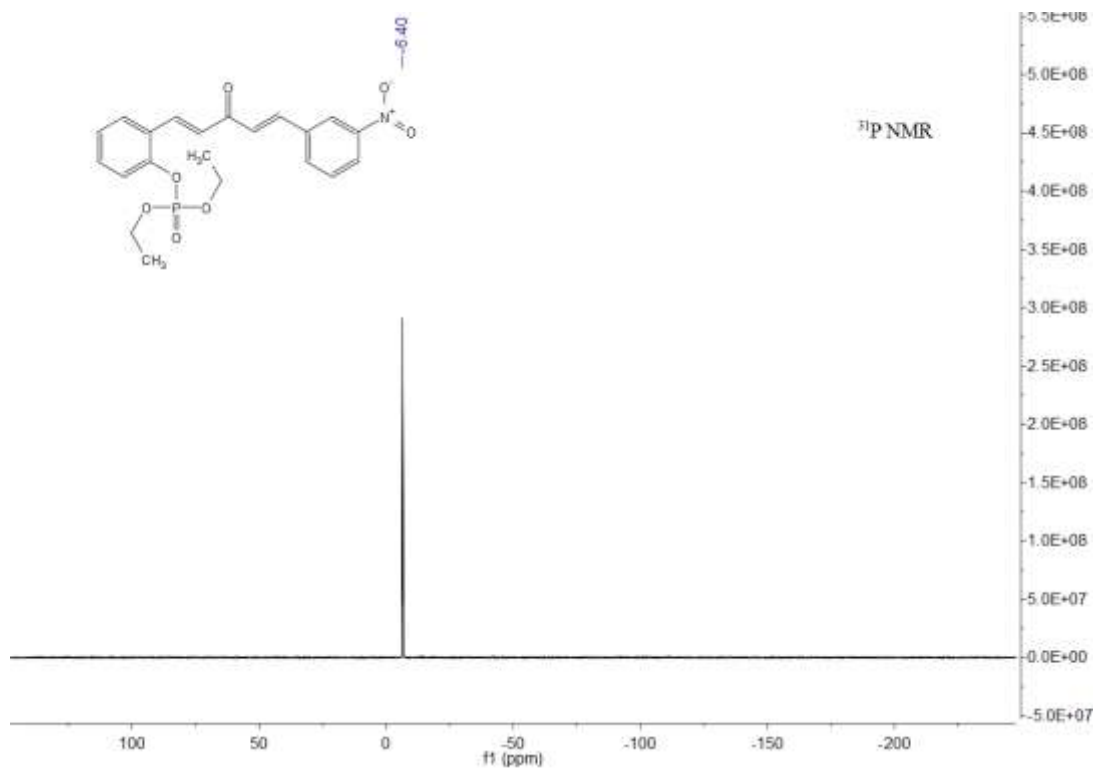

2018050841 #95 RT: 0.92 AV: 1 NL: 7.67E8  
T: FTMS + p ESI Full ms [100.0000-1000.0000]

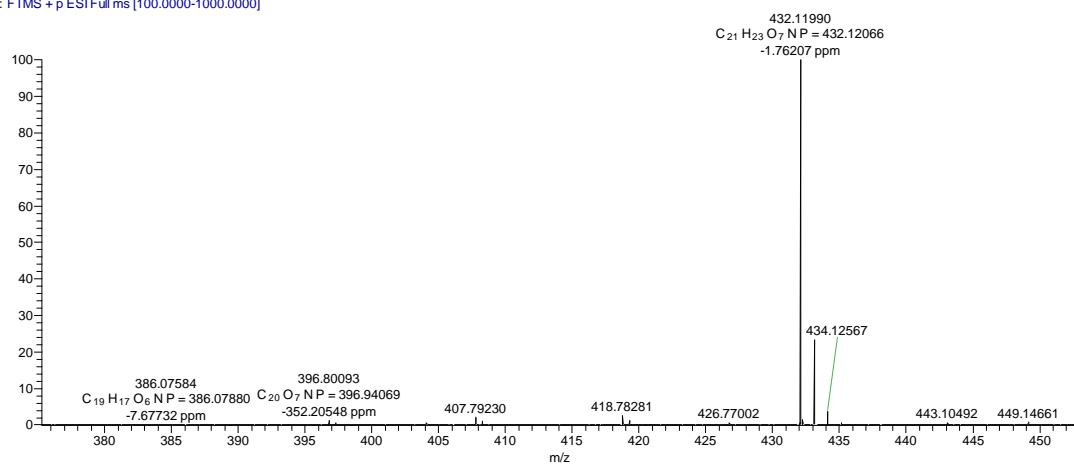

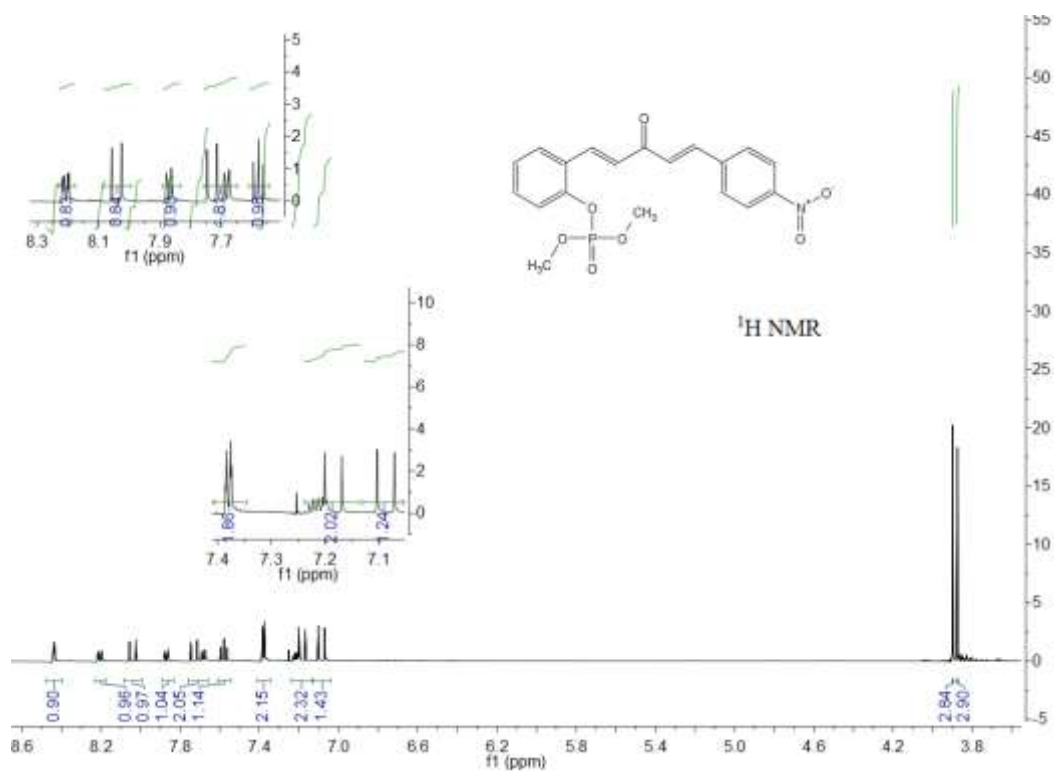

<sup>1</sup>H NMR of compound **3i**

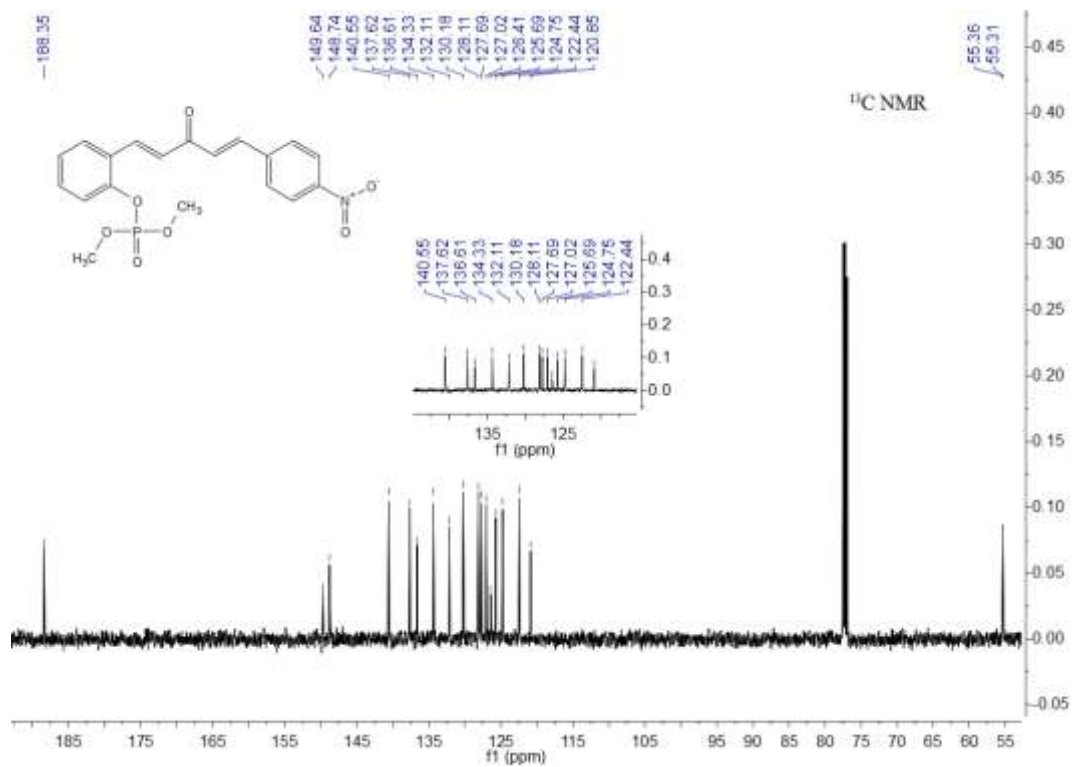

<sup>13</sup>C NMR of compound **3i**

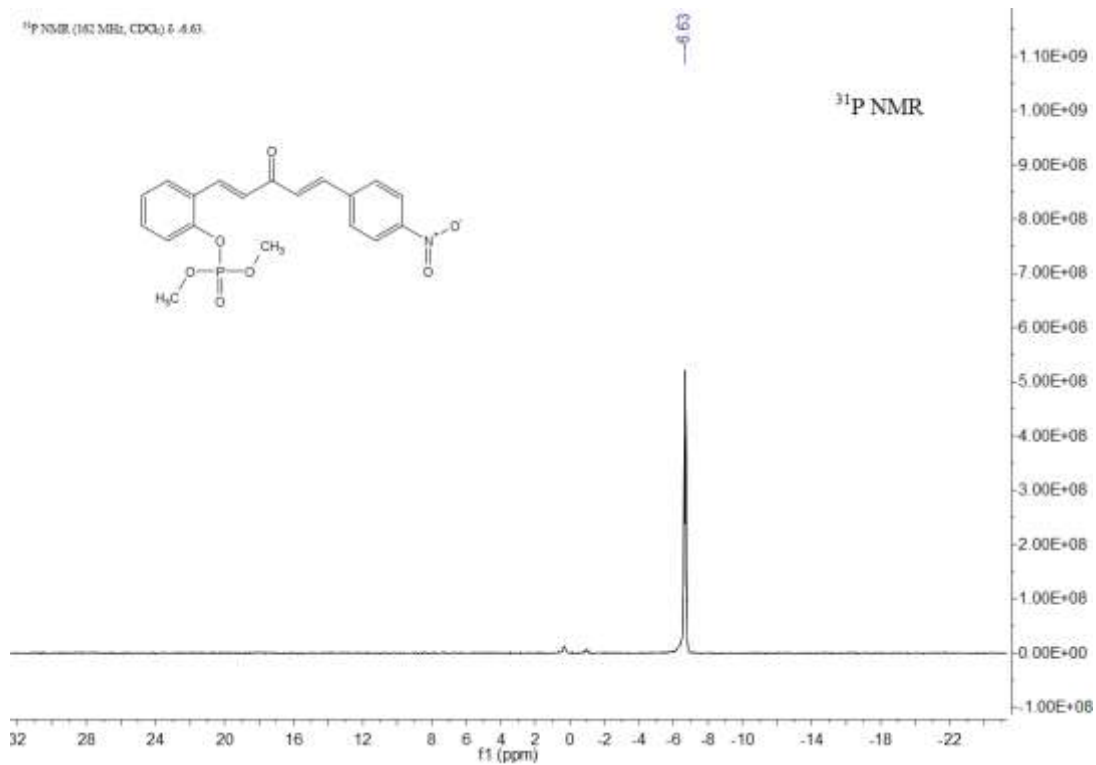

<sup>31</sup>P NMR of compound **3i**

2018050842 #105 RT: 1.01 AV: 1 NL: 1.63E8  
T: FTMS + p ESI Full ms [100.0000-1000.0000]

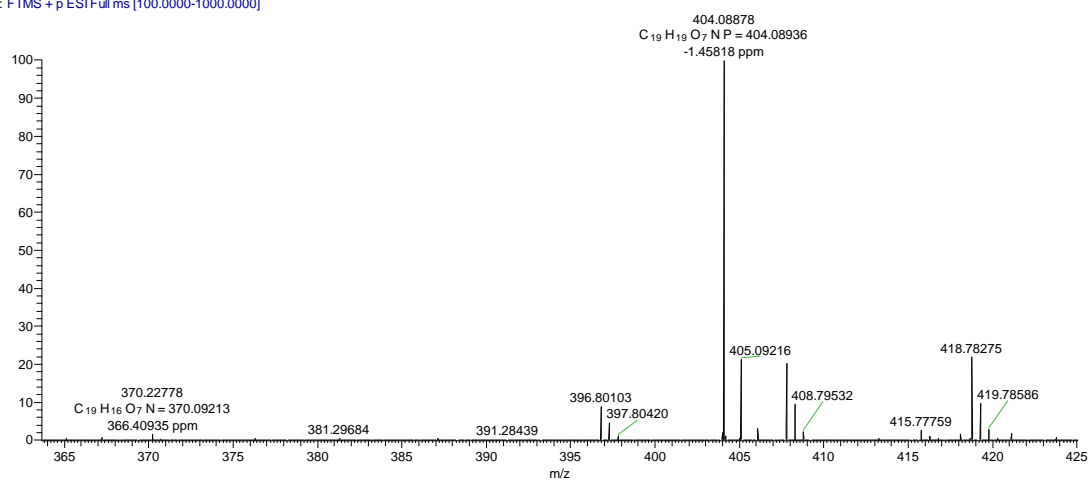

HRMS of compound **3i**

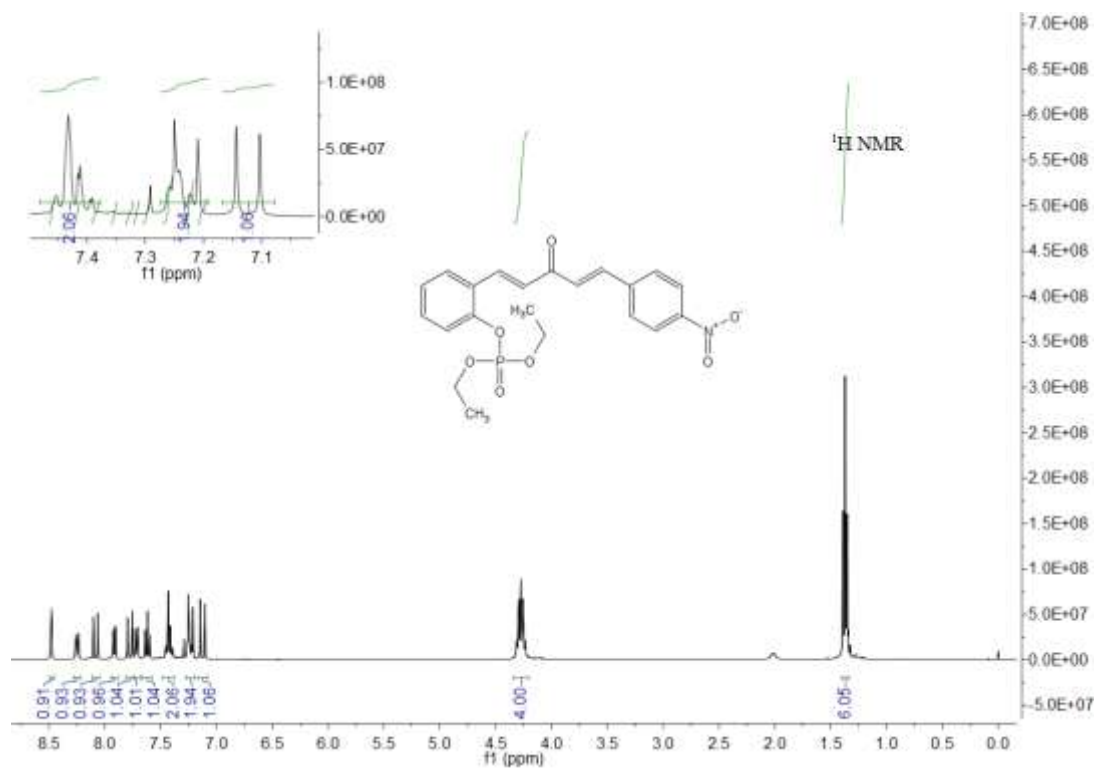

<sup>1</sup>H NMR of compound **3j**

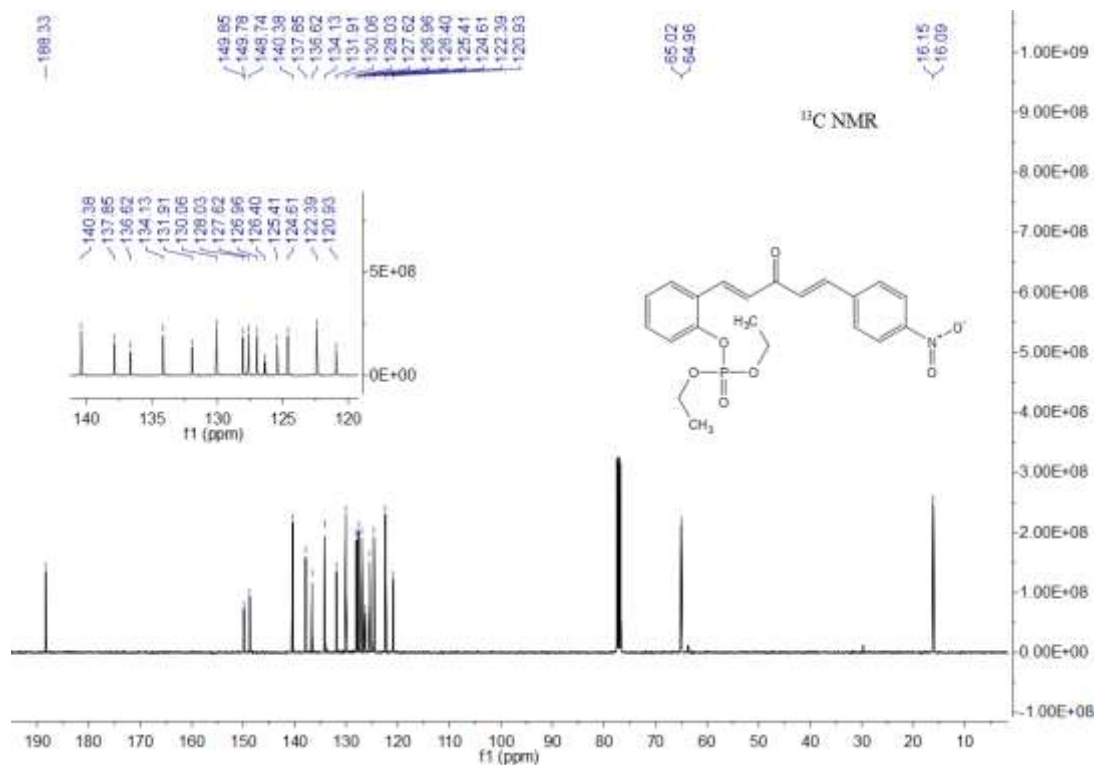

<sup>13</sup>C NMR of compound **3j**

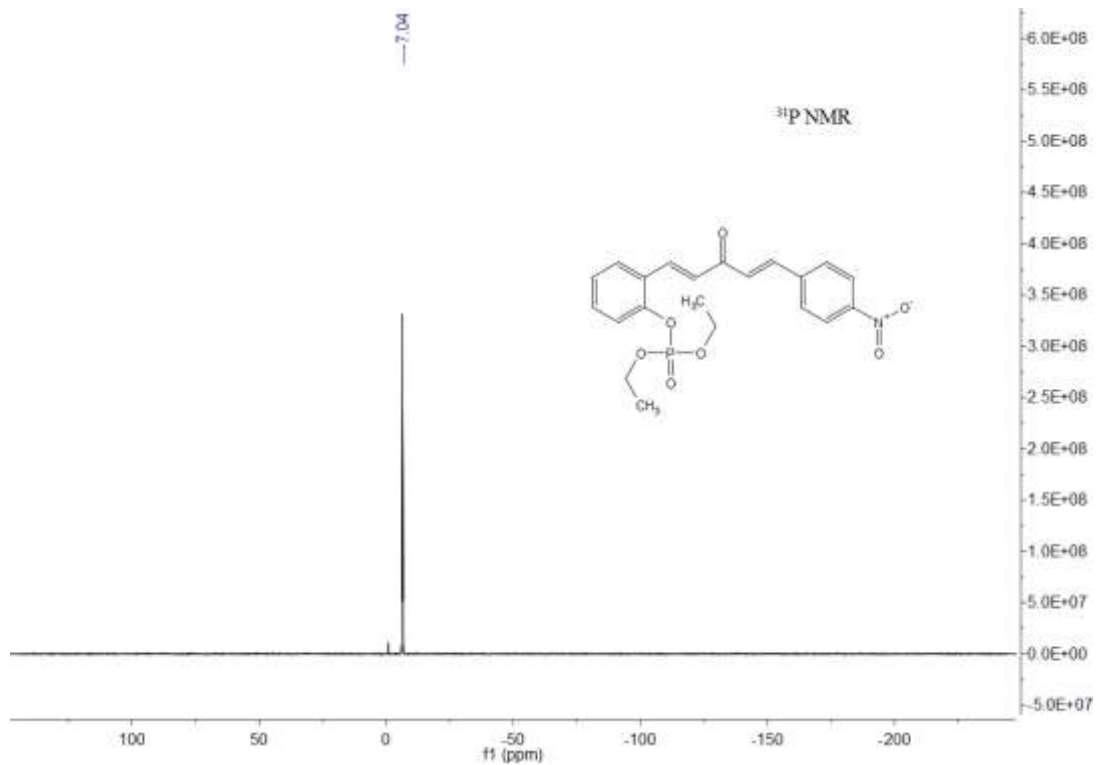

<sup>31</sup>P NMR of compound **3j**

2018050843 #101 RT: 0.98 AV: 1 NL: 6.73E8  
T: FTMS + p ESI Full ms [100.0000-1000.0000]

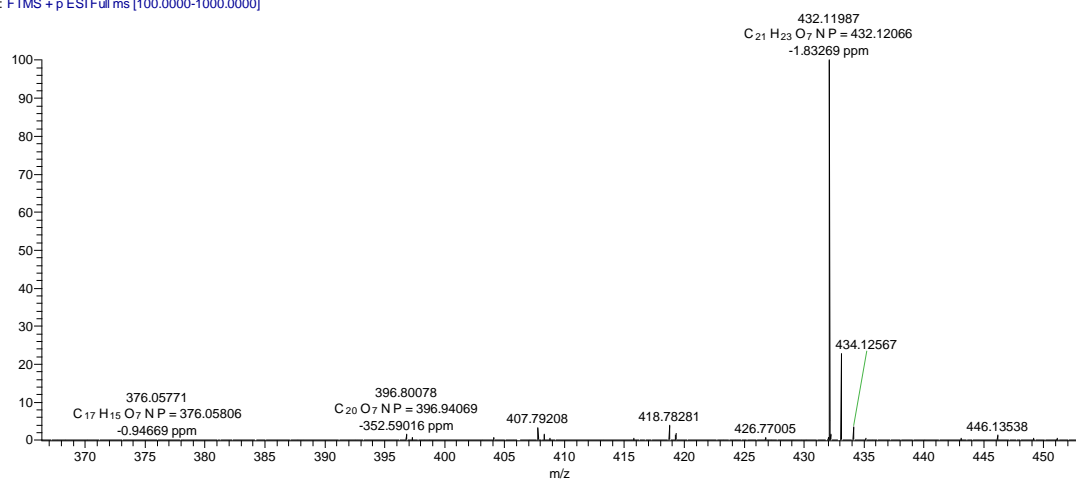

HRMS of compound **3j**

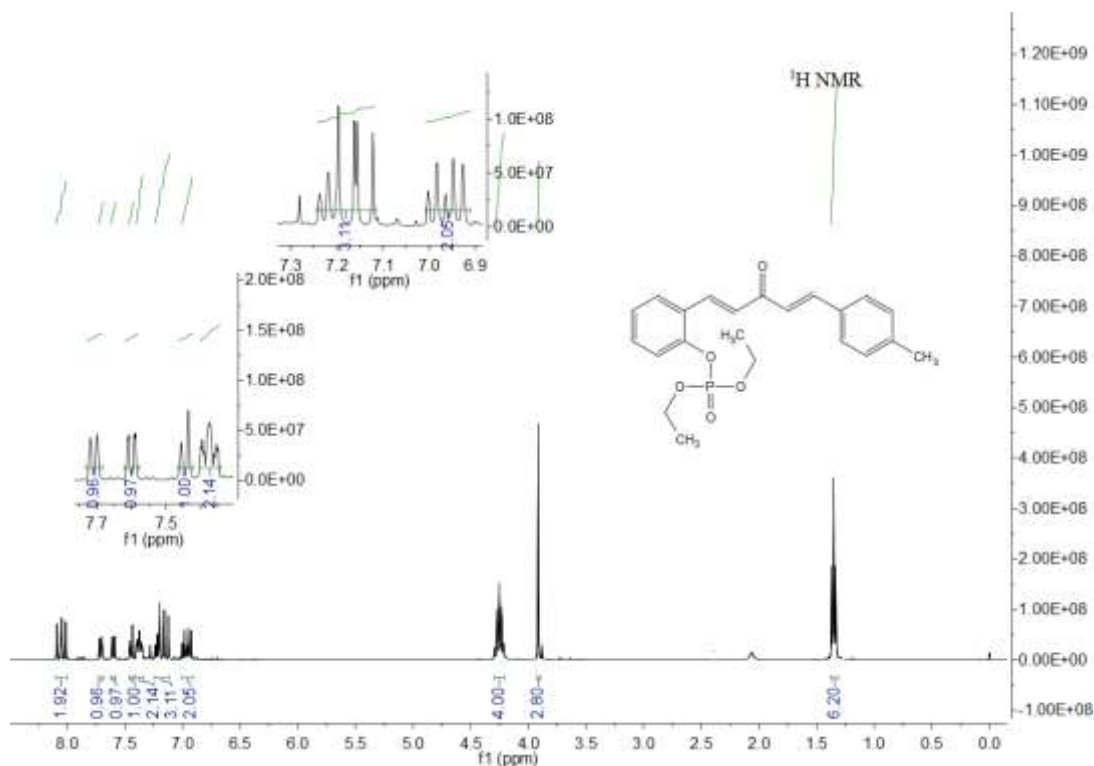

<sup>1</sup>H NMR of compound **3k**

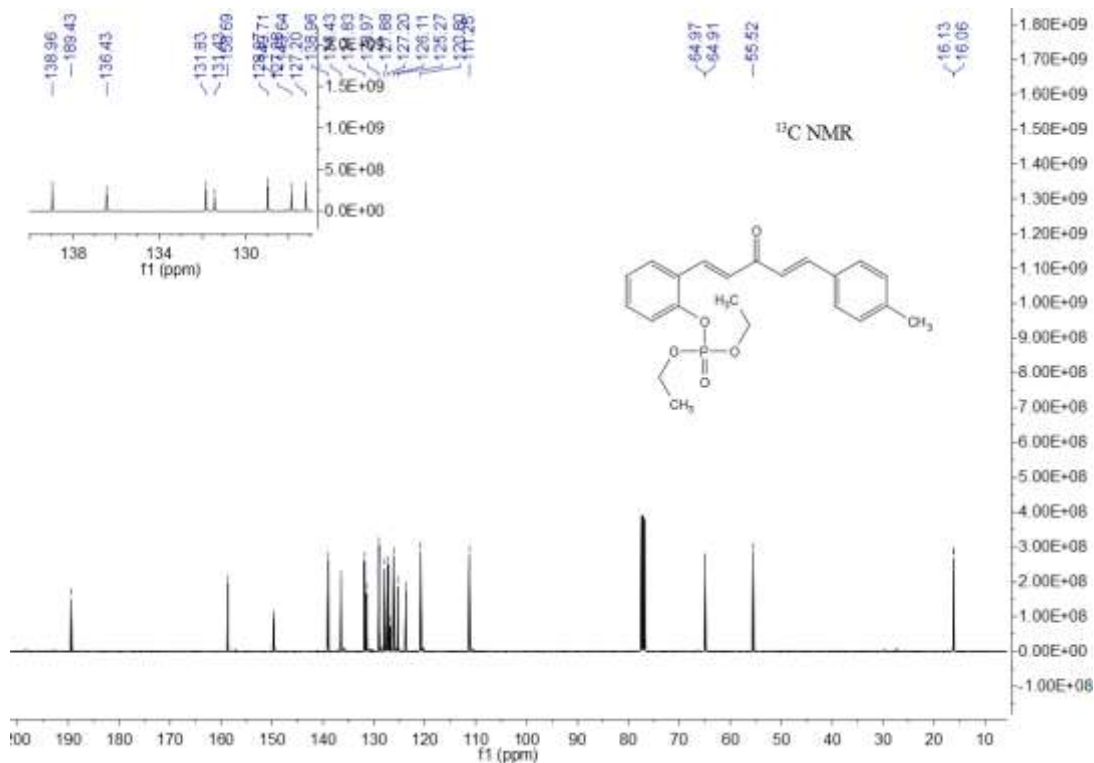

<sup>13</sup>C NMR of compound **3k**

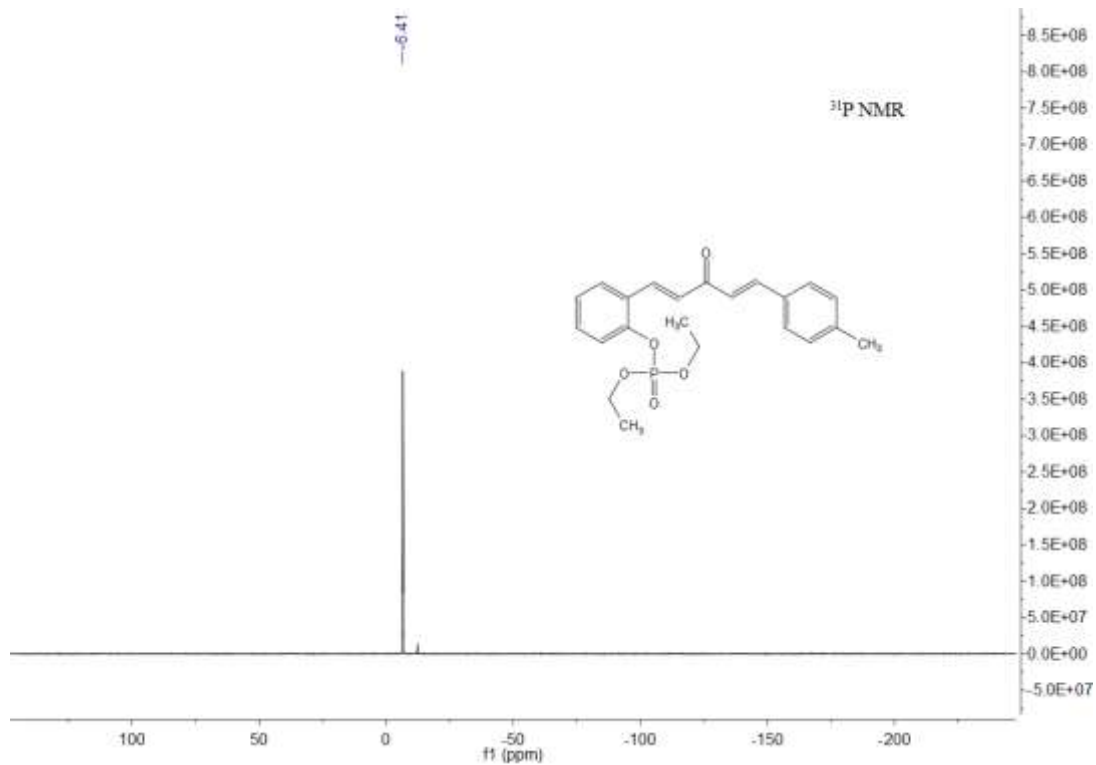

<sup>31</sup>P NMR of compound 3k

2018081007 #105 RT: 1.05 AV: 1 NL: 9.21E7  
T: FTMS + p ESI Full ms [100.0000-1000.0000]

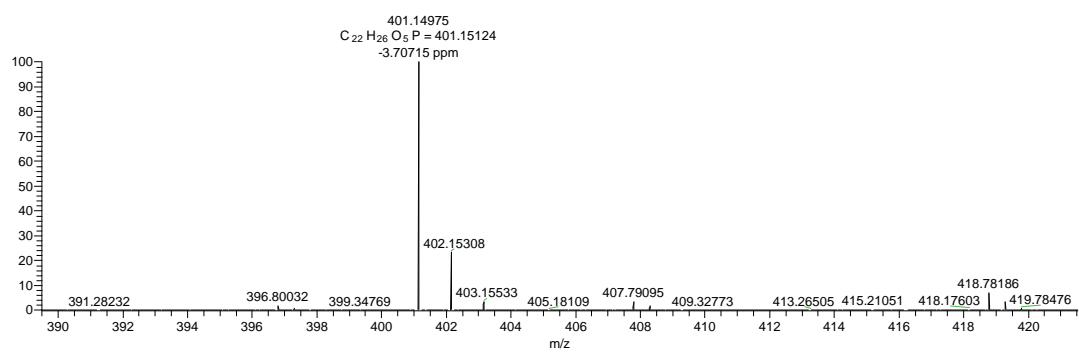

HRMS of compound 3k



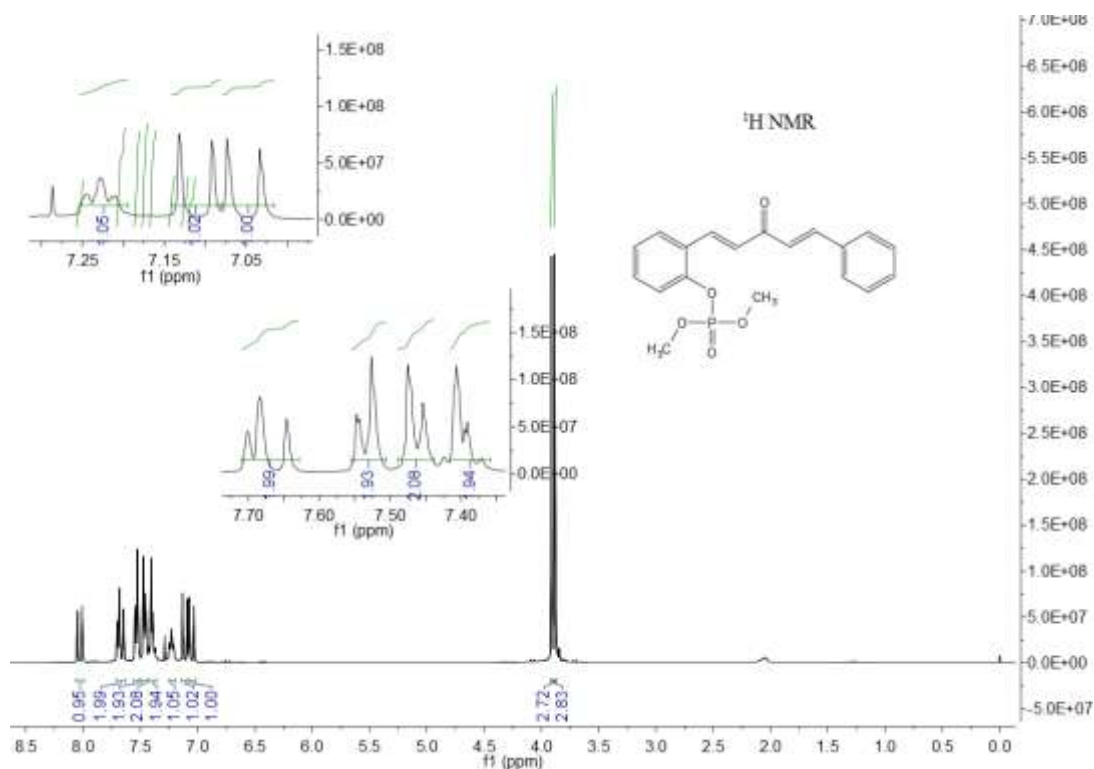

<sup>1</sup>H NMR of compound **31**

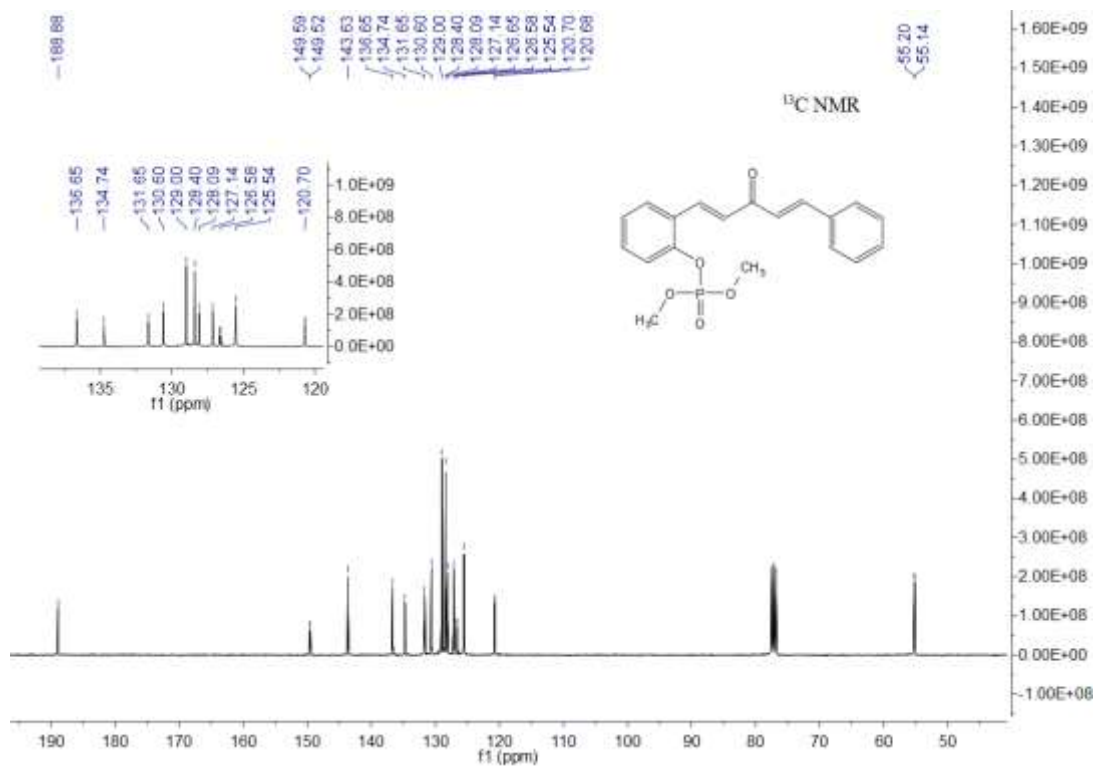

<sup>13</sup>C NMR of compound **31**

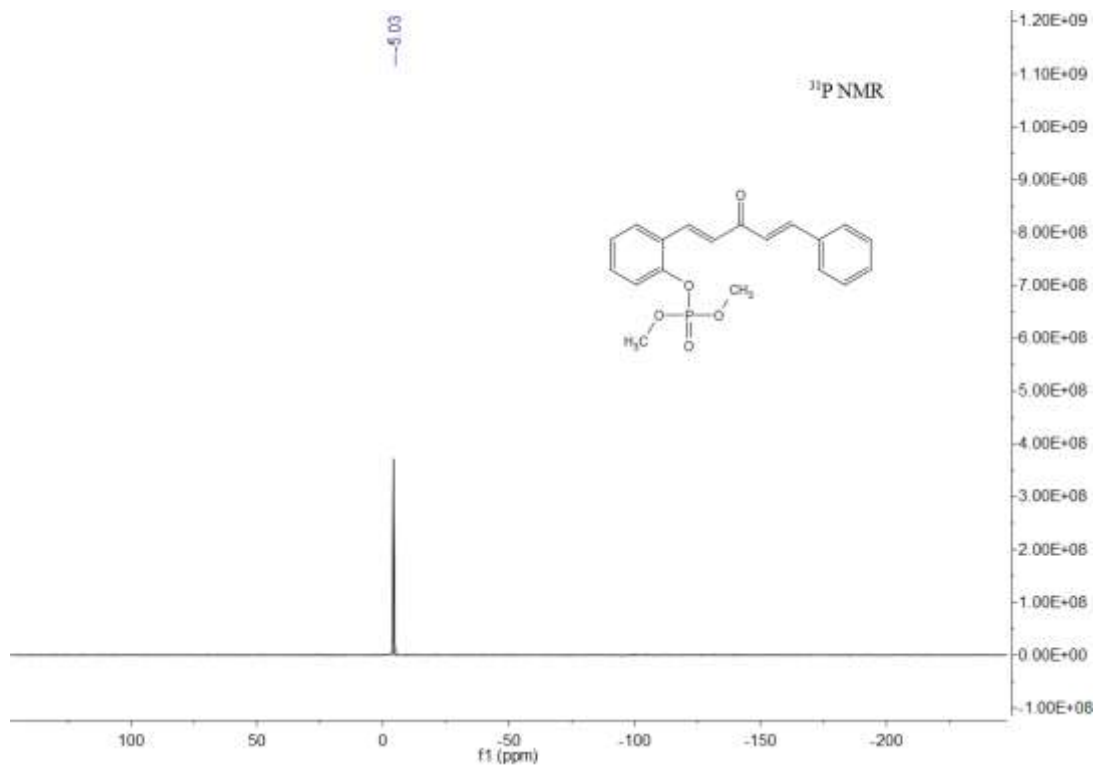

<sup>31</sup>P NMR of compound **31**

2017110779(1) #83 RT: 0.82 AV: 1 NL: 4.27E8  
T: FTMS + p ESI Full ms [100.0000-1000.0000]

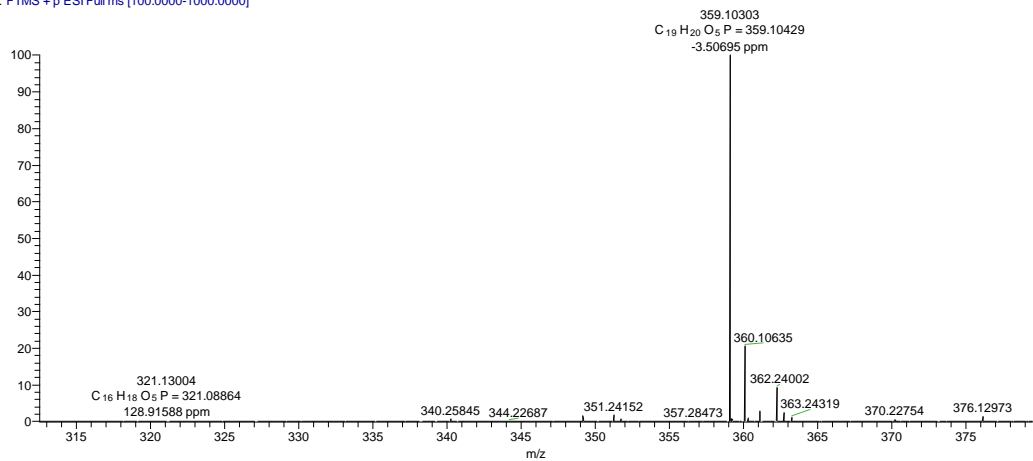

HRMS of compound **31**

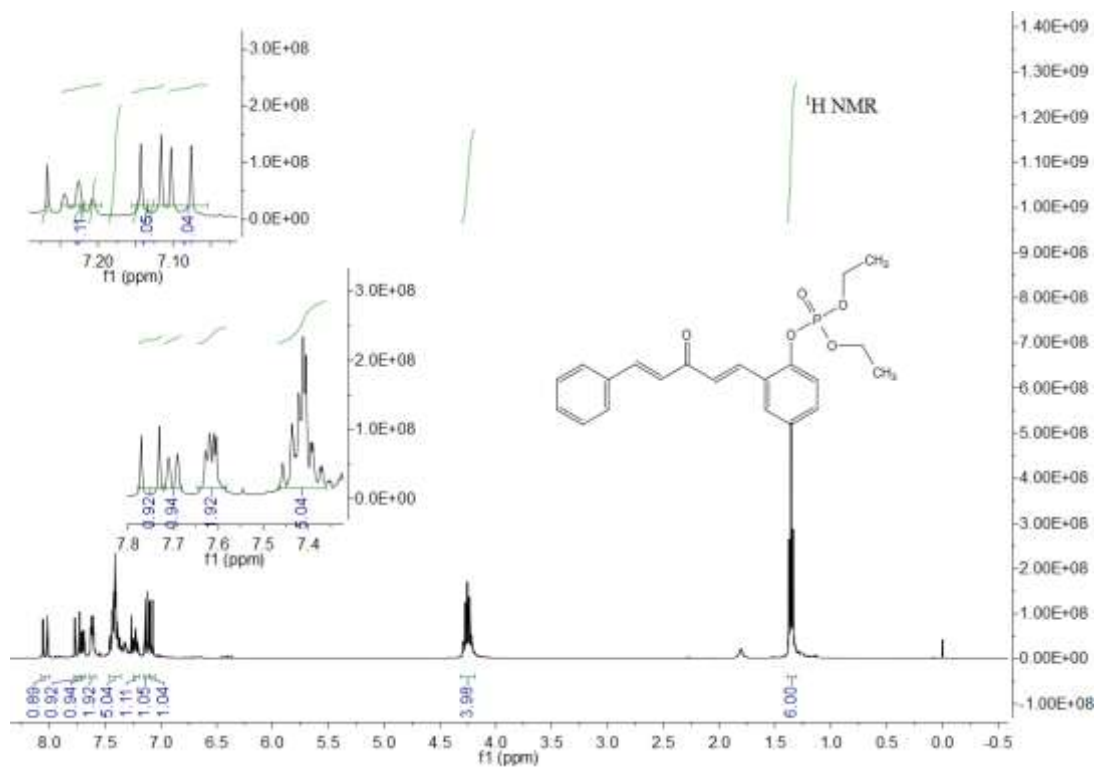

<sup>1</sup>H NMR of compound **3m**

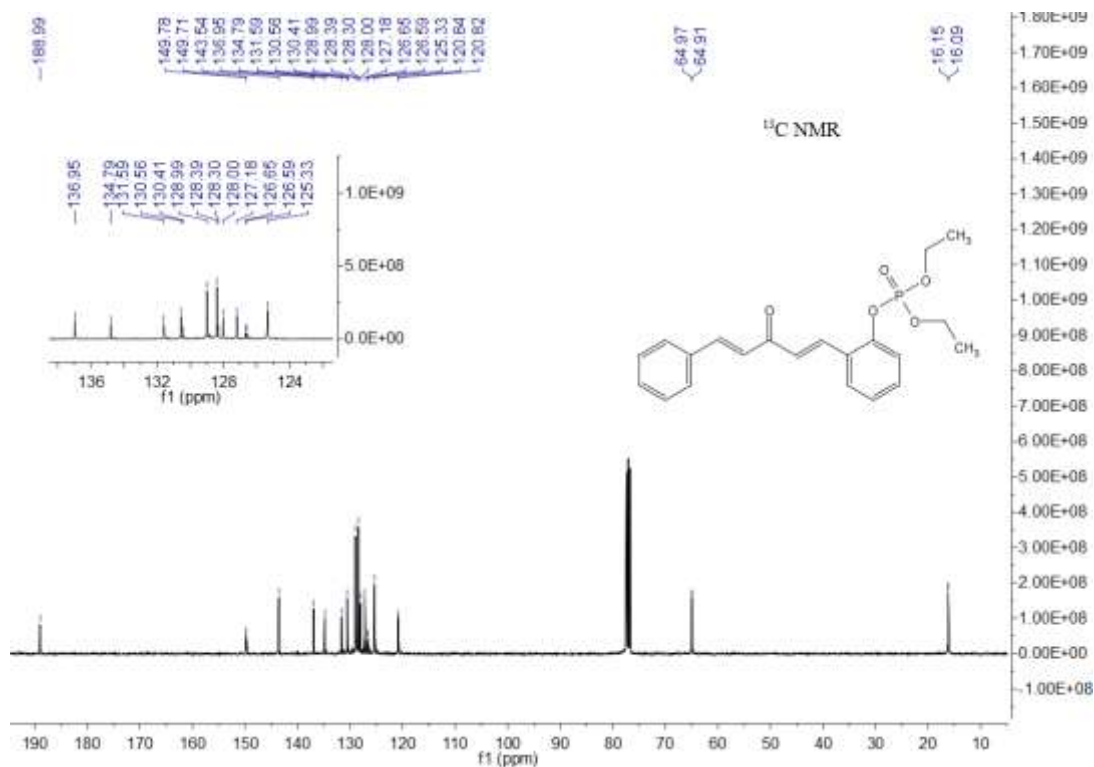

<sup>13</sup>C NMR of compound **3m**

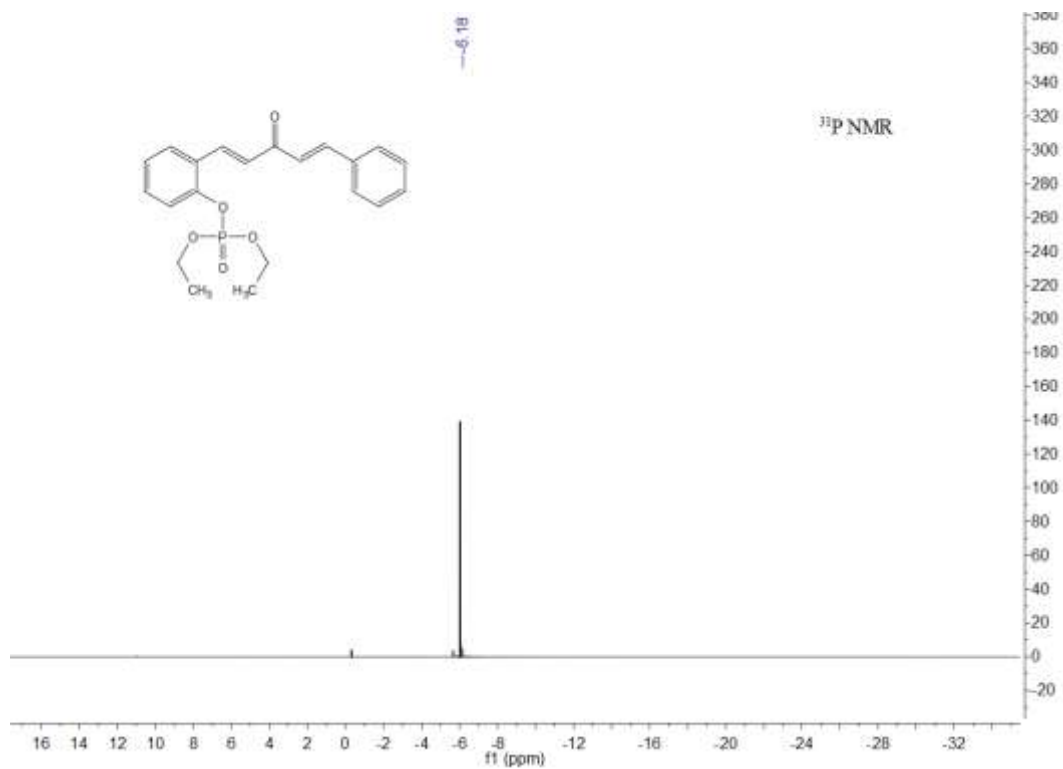

<sup>31</sup>P NMR of compound **3m**

2017110780(1) #89 RT: 0.88 AV: 1 NL: 5.62E8  
T: FTMS + p ESI/Full ms [100.0000-1000.0000]

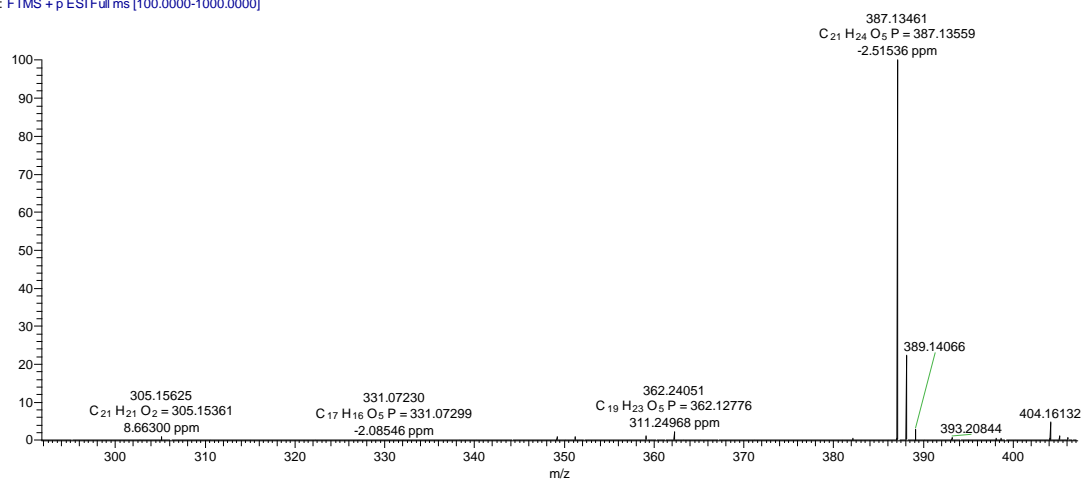

HRMS of compound **3m**

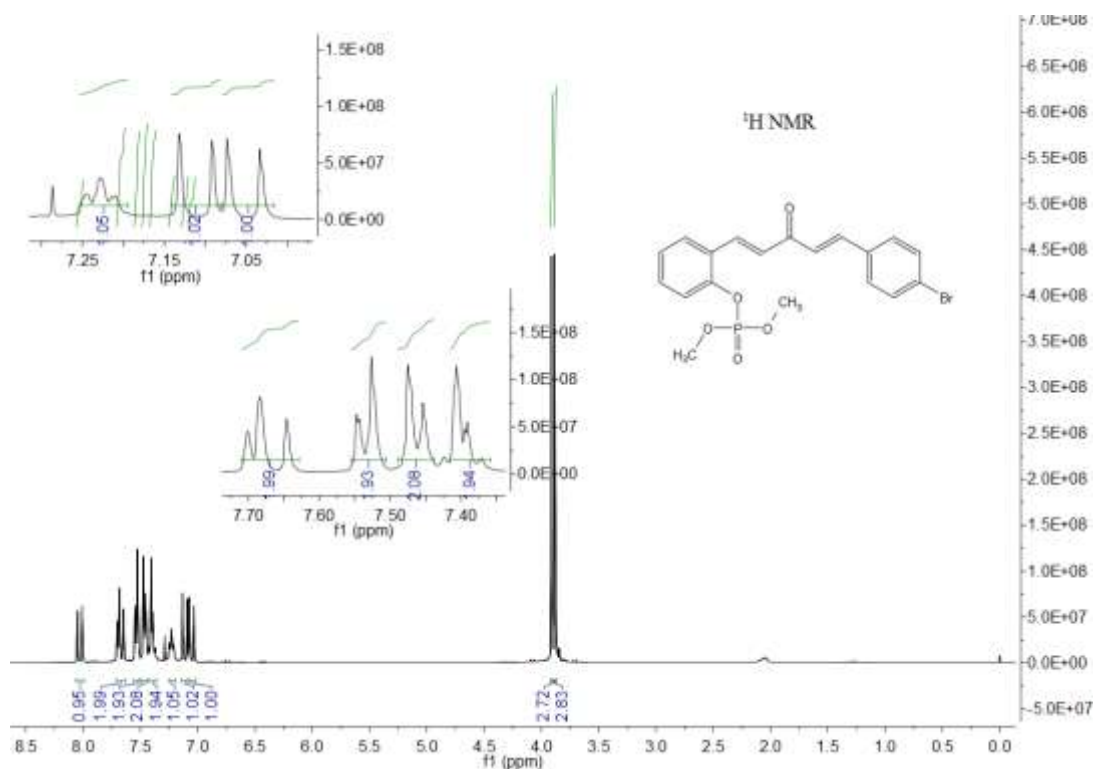

<sup>1</sup>H NMR of compound **3n**

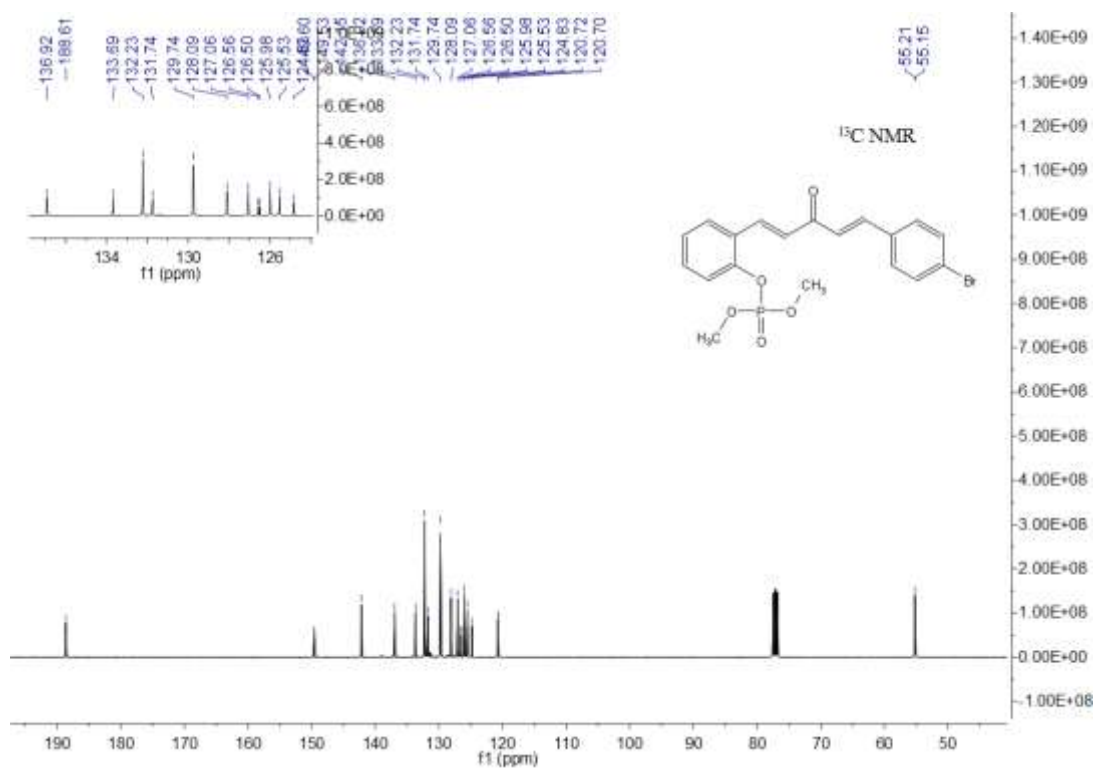

<sup>13</sup>C NMR of compound **3n**

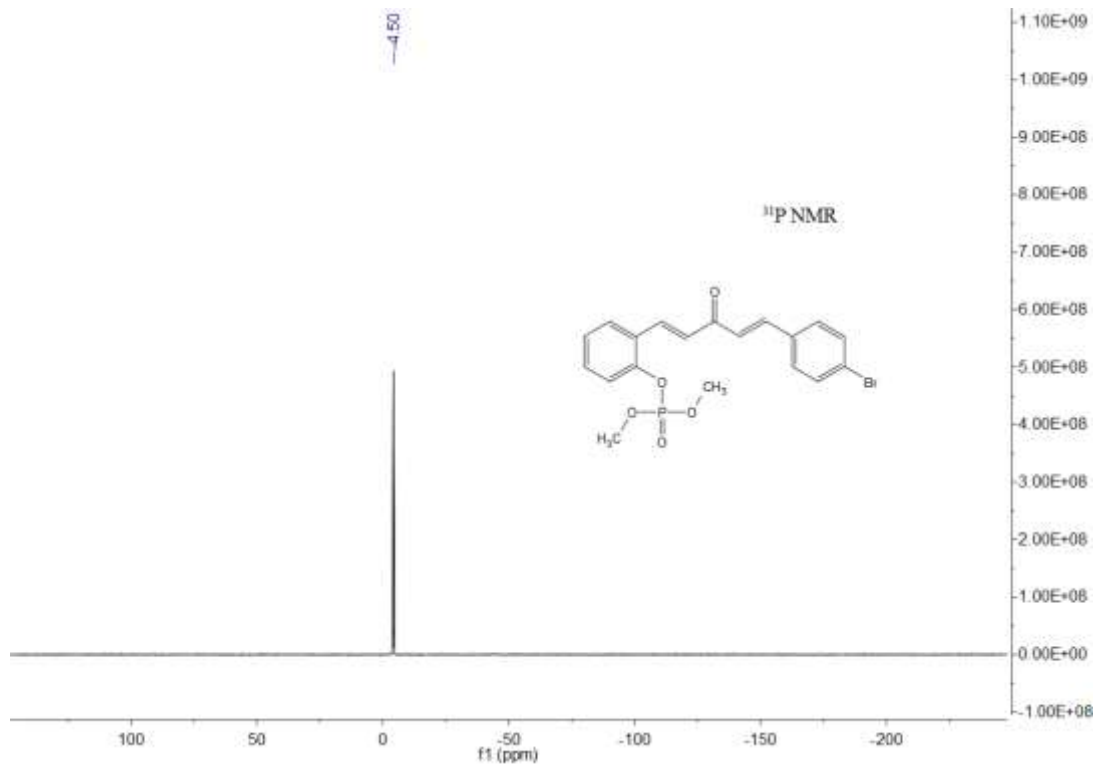

<sup>31</sup>P NMR of compound **3n**

2018060539 #91 RT: 0.88 AV: 1 NL: 4.16E8  
T: FTMS + p ESI Full ms [100.0000-1000.0000]

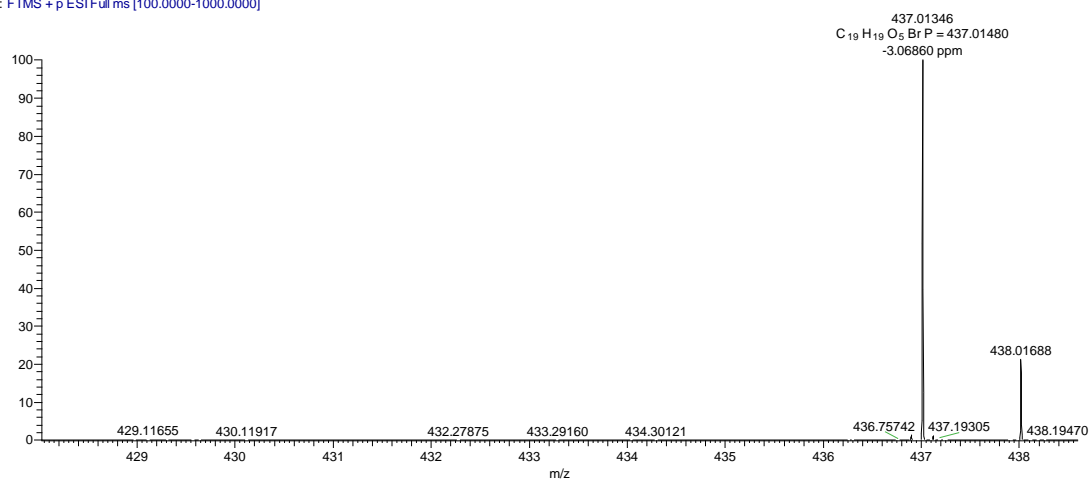

HRMS of compound **3n**

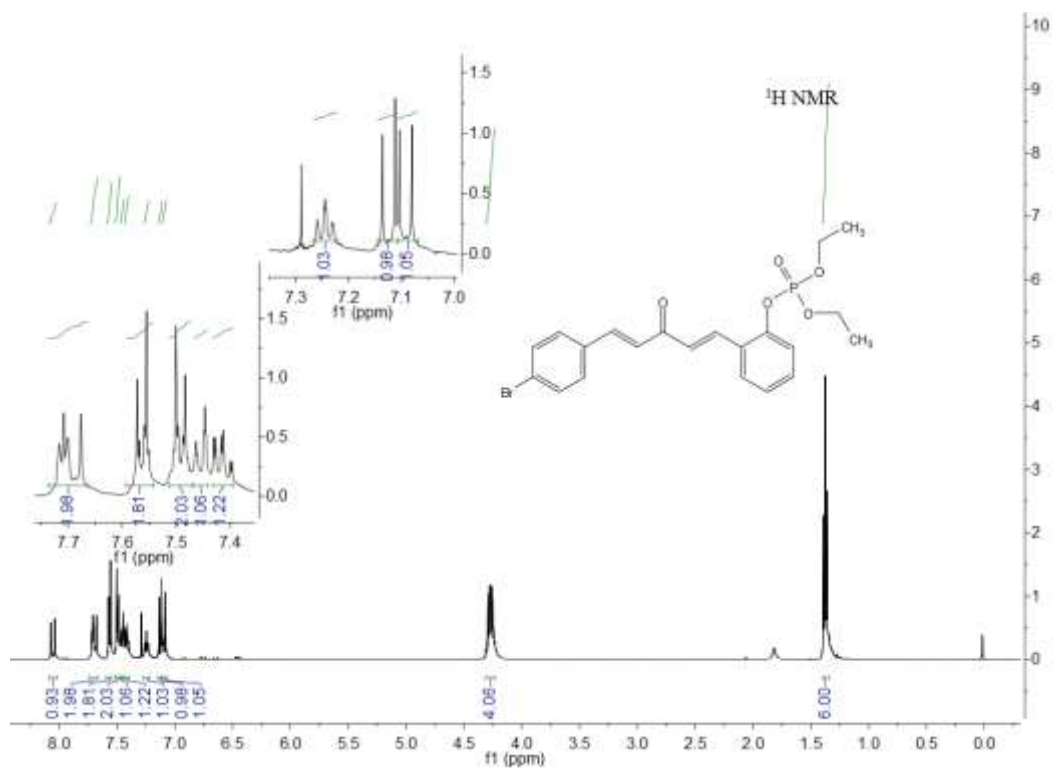

<sup>1</sup>H NMR of compound **30**



<sup>13</sup>C NMR of compound **30**

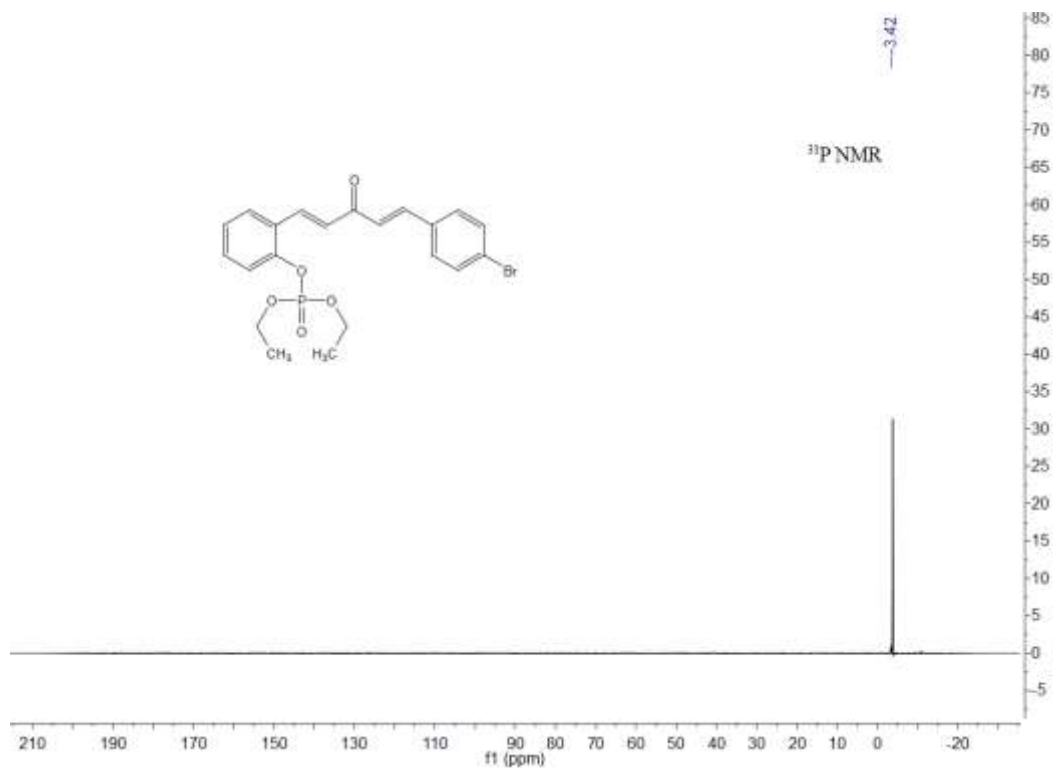

<sup>31</sup>P NMR of compound **30**

2018060540 #109 RT: 1.06 AV: 1 NL: 4.53E8  
T: FTMS + p ESI Full ms [100.0000-1000.0000]

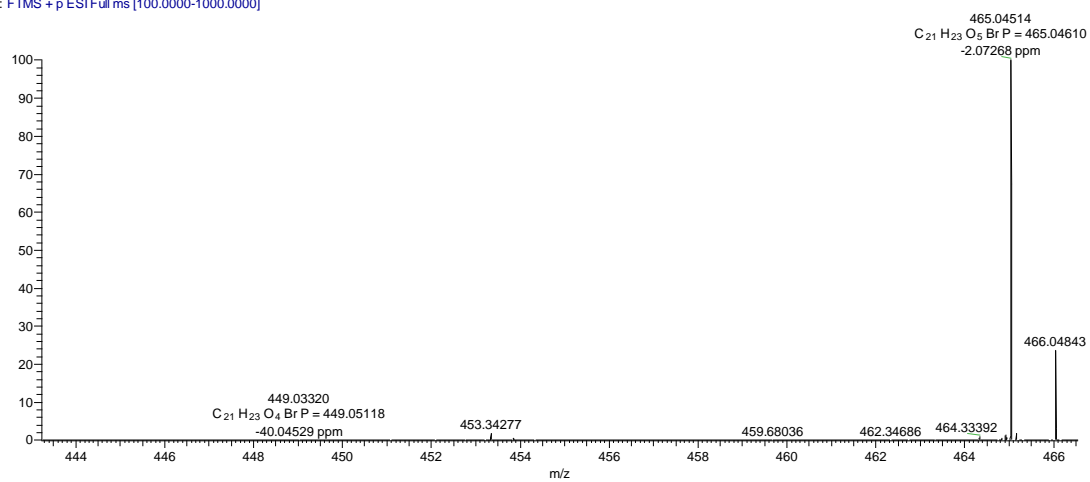

HRMS of compound **30**



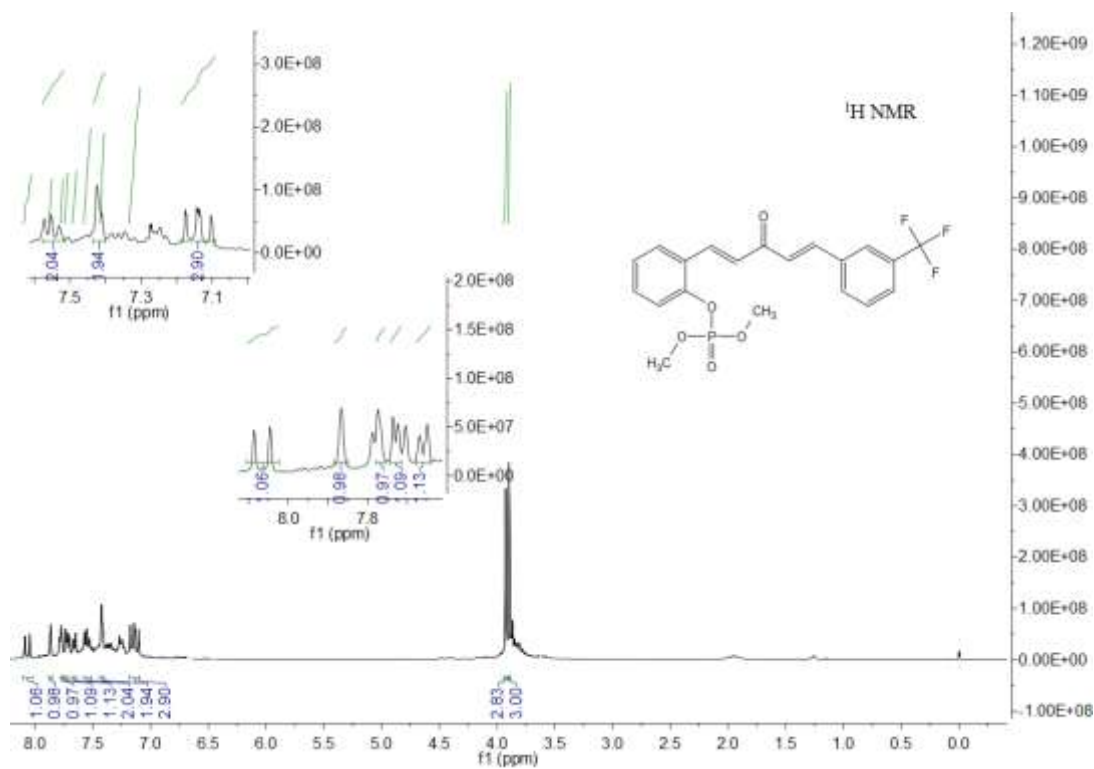

<sup>1</sup>H NMR of compound 3p

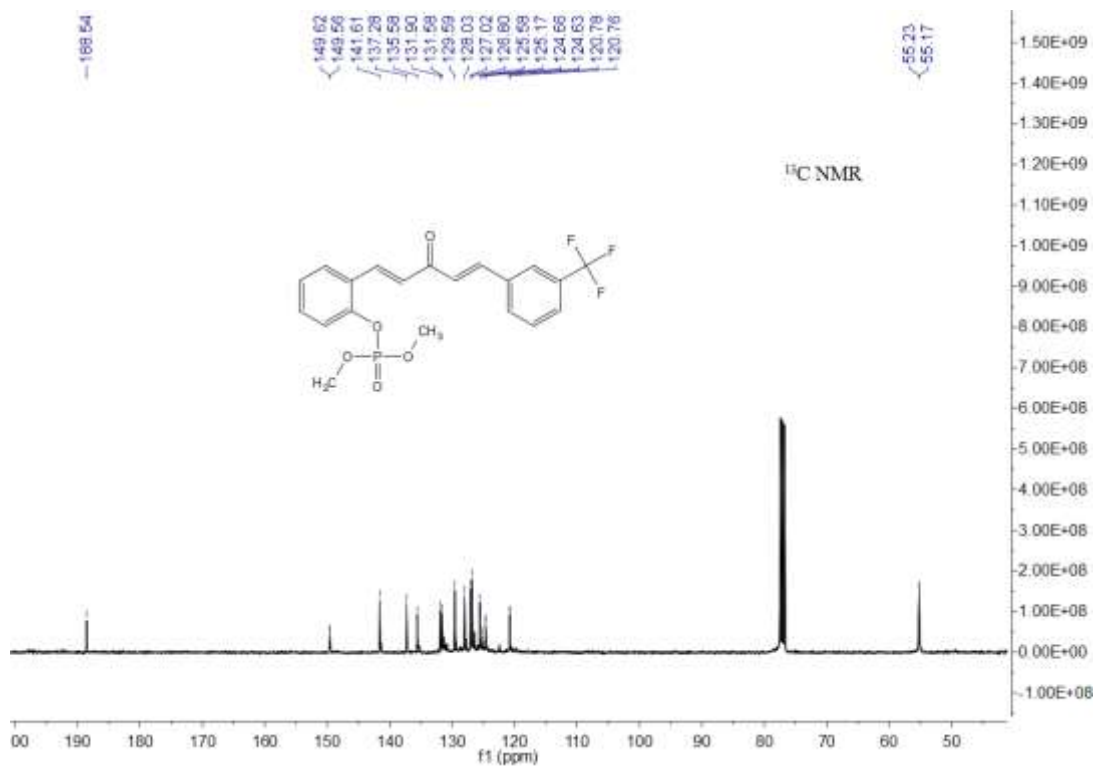

<sup>13</sup>C NMR of compound 3p

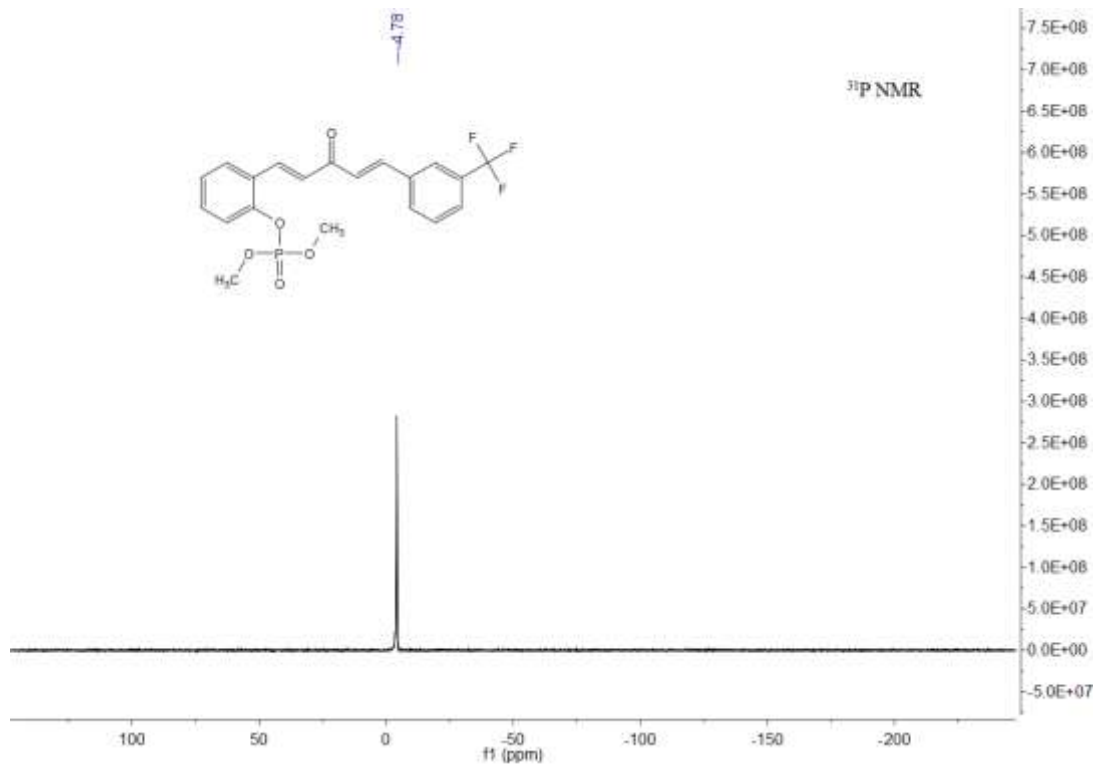

<sup>31</sup>P NMR of compound **3p**

2018081012 #85 RT: 0.83 AV: 1 NL: 1.47E8  
T: FTMS + p ESI Full ms [100.0000-1000.0000]

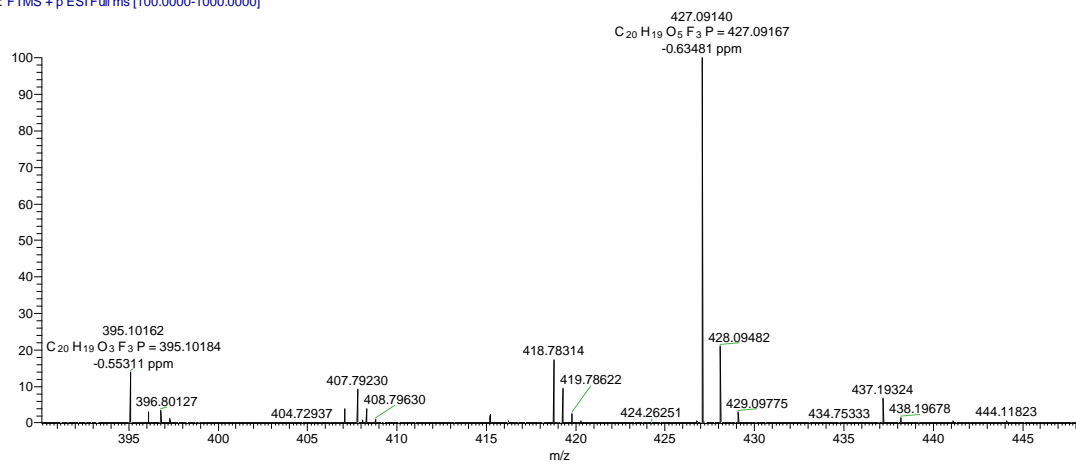

HRMS of compound **3p**

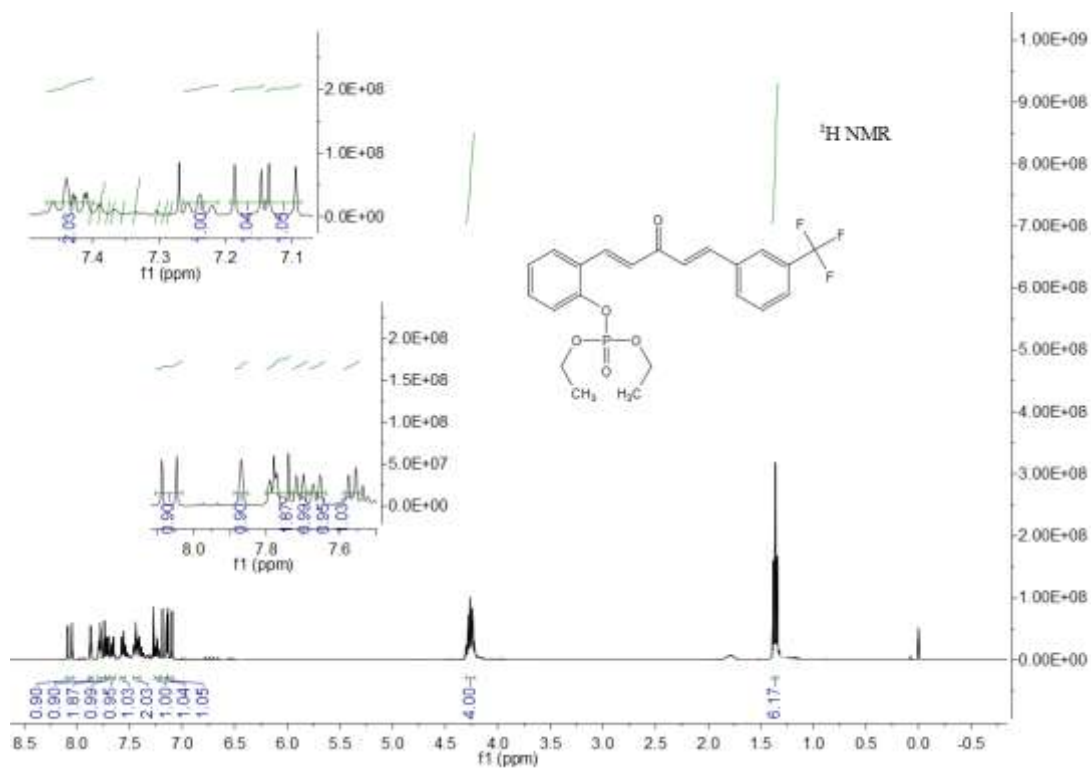

<sup>1</sup>H NMR of compound **3q**

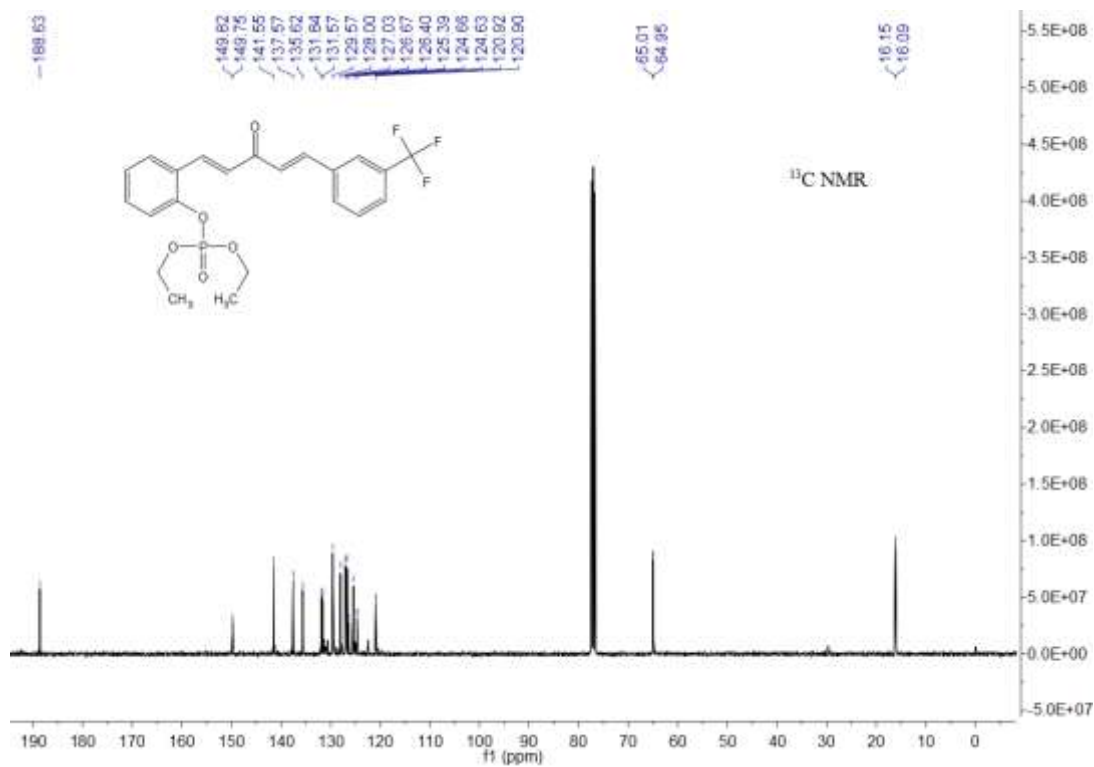

<sup>13</sup>C NMR of compound **3q**

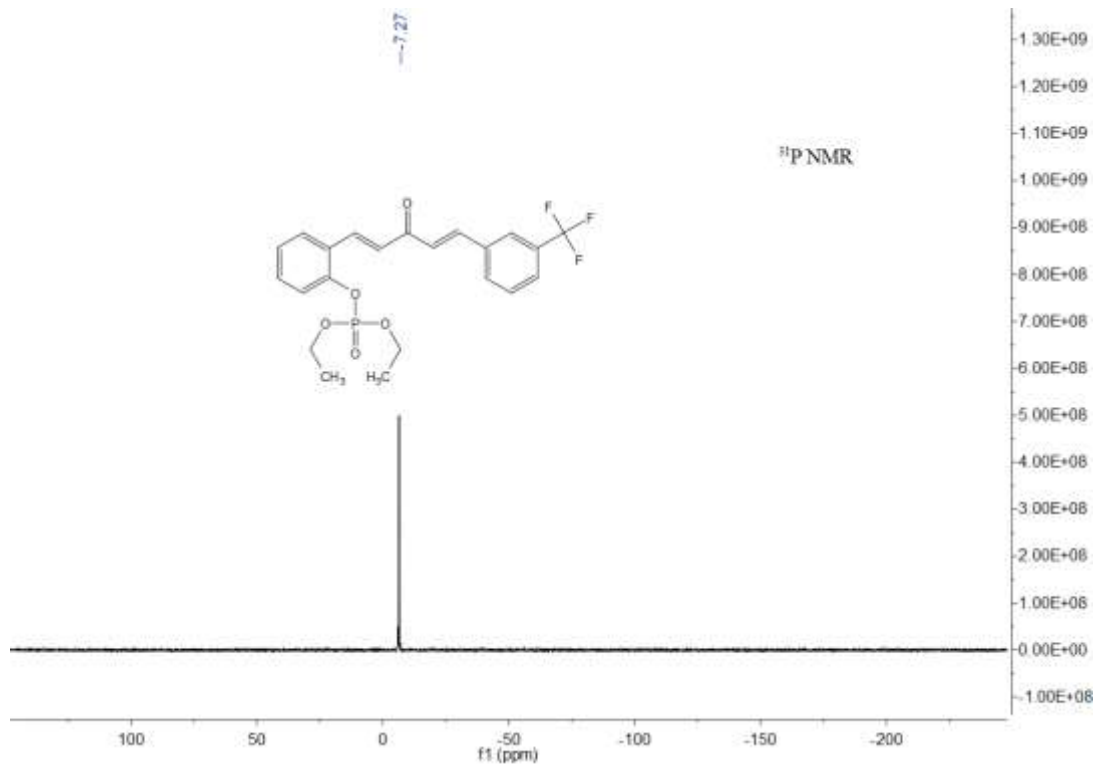

<sup>31</sup>P NMR of compound 3q

2018070614 #115 RT: 1.10 AV: 1 NL: 5.55E7  
T: FTMS + p ESI Full ms [100.0000-1000.0000]

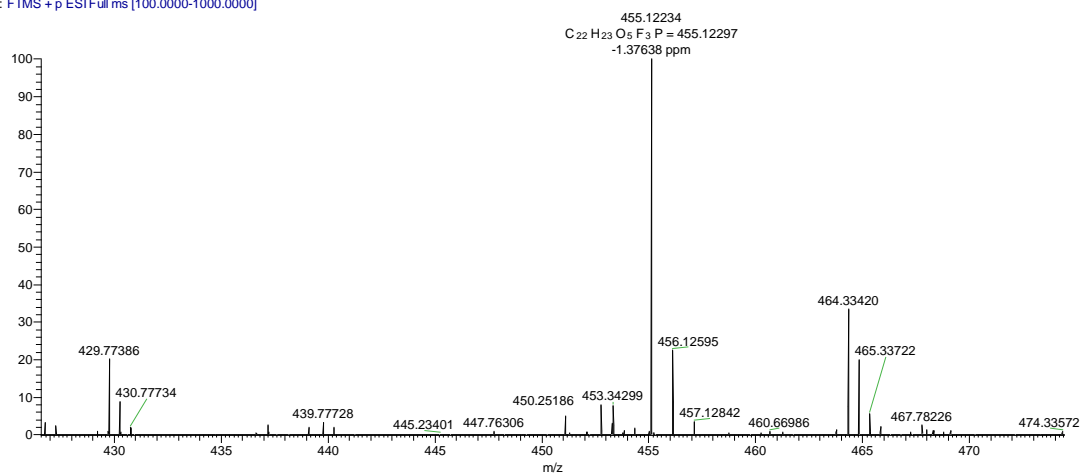

HRMS of compound 3q

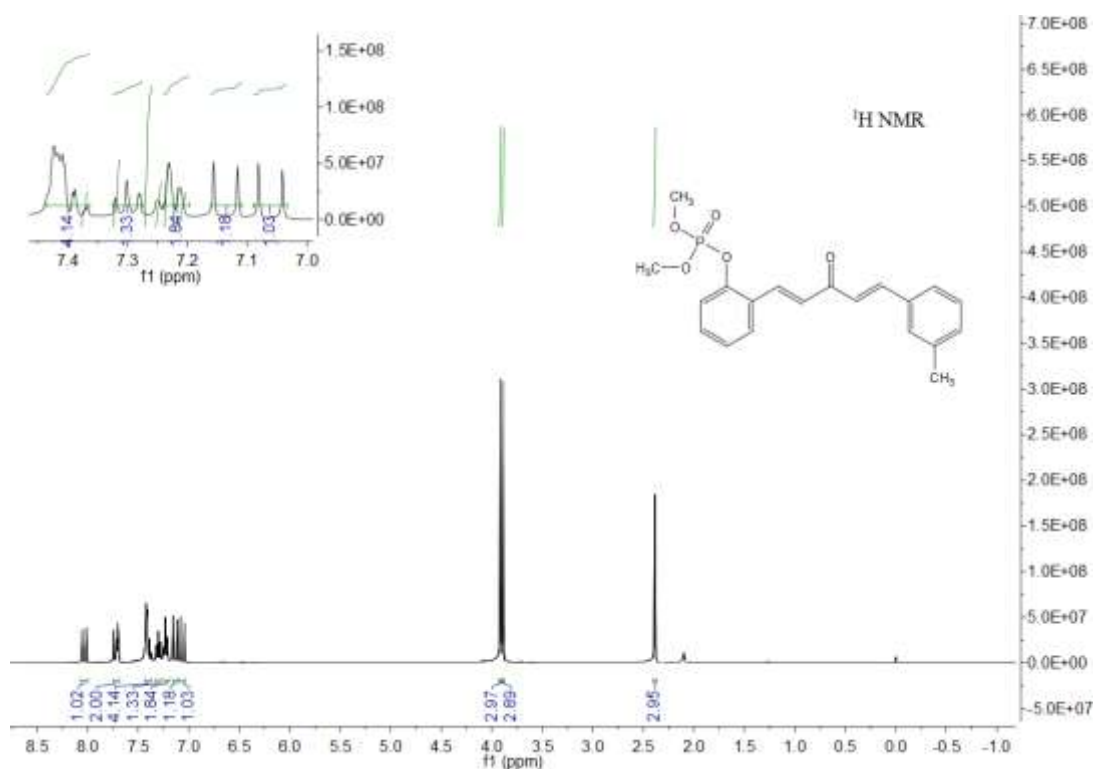

<sup>1</sup>H NMR of compound **3r**

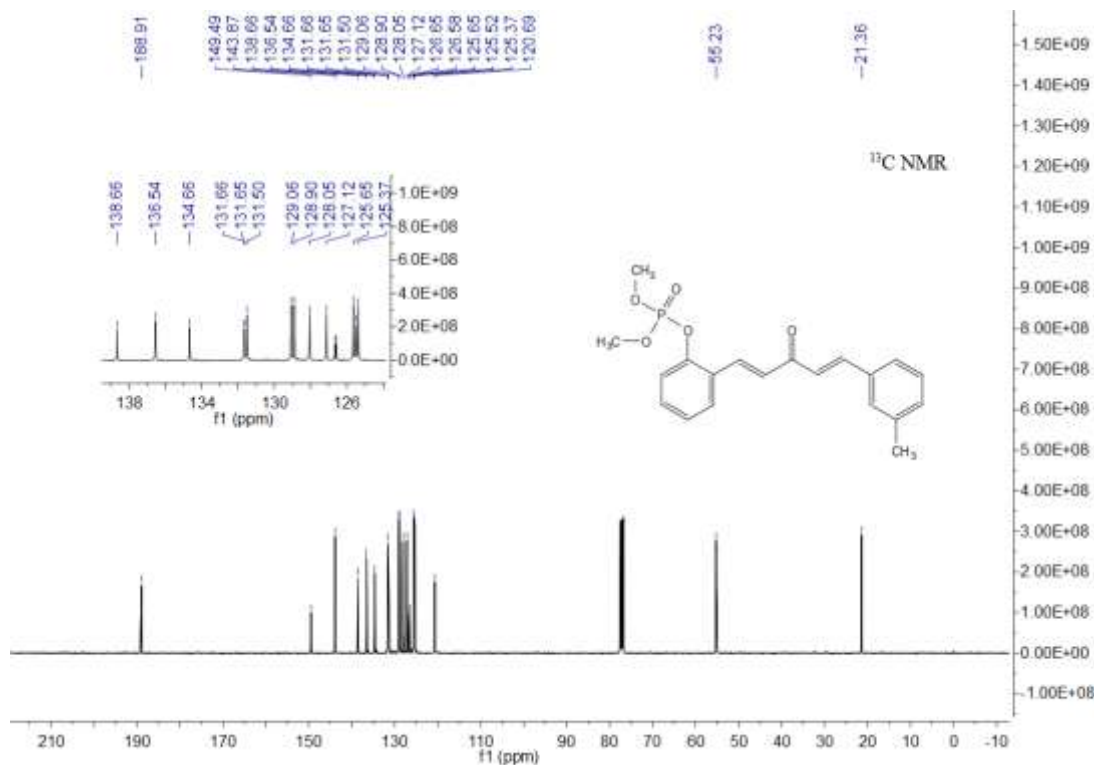

<sup>13</sup>C NMR of compound **3r**

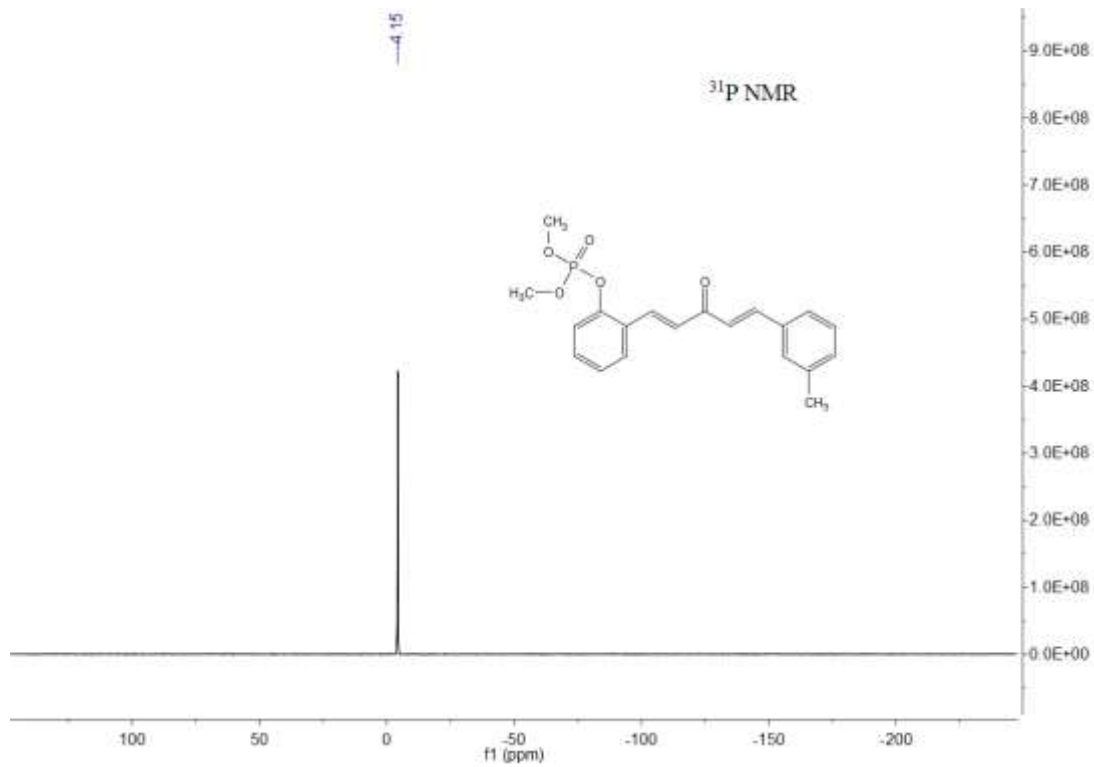

<sup>31</sup>P NMR of compound **3r**

2018081013 #81 RT: 0.79 AV: 1 NL: 3.02E8  
T: FTMS + p ESI Full ms [100.0000-1000.0000]

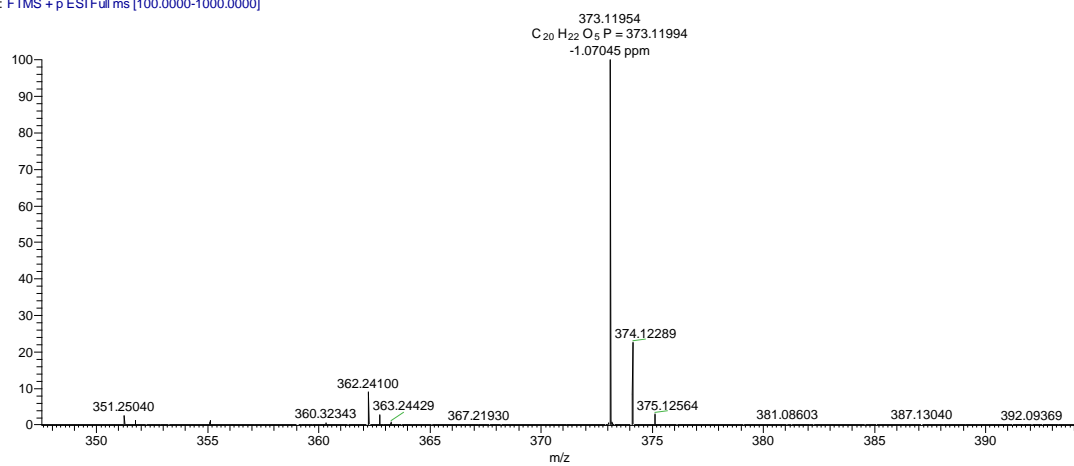

HRMS of compound **3r**

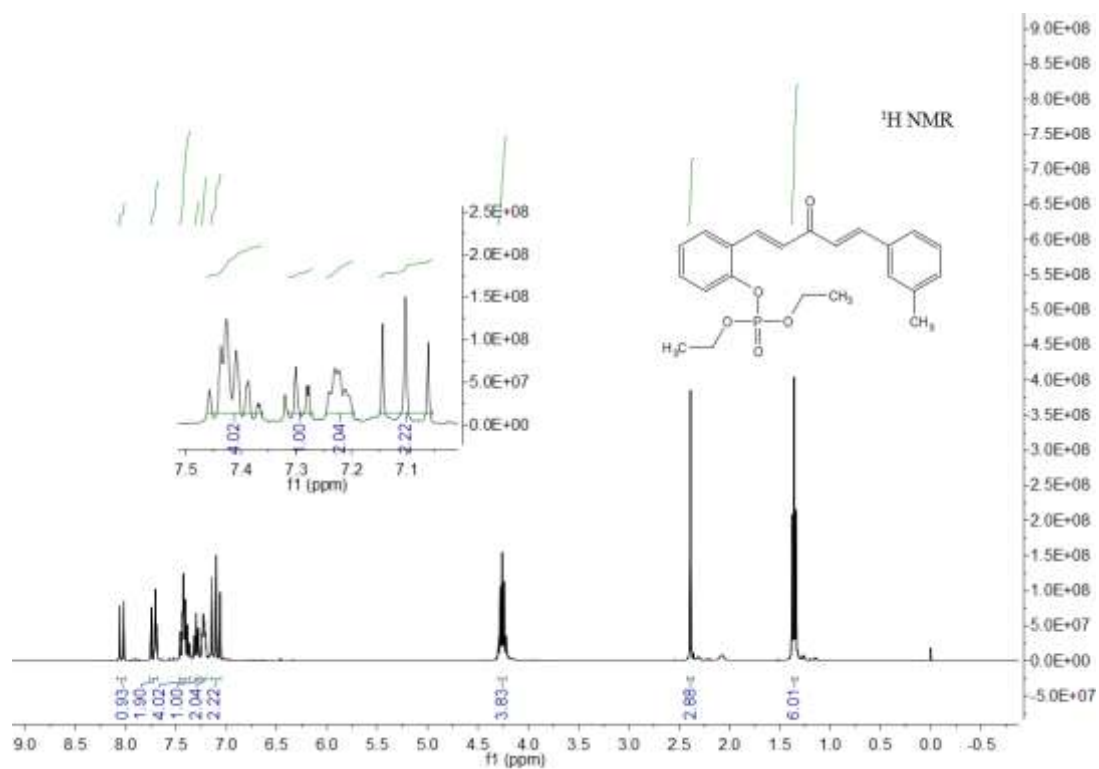

<sup>1</sup>H NMR of compound 3s

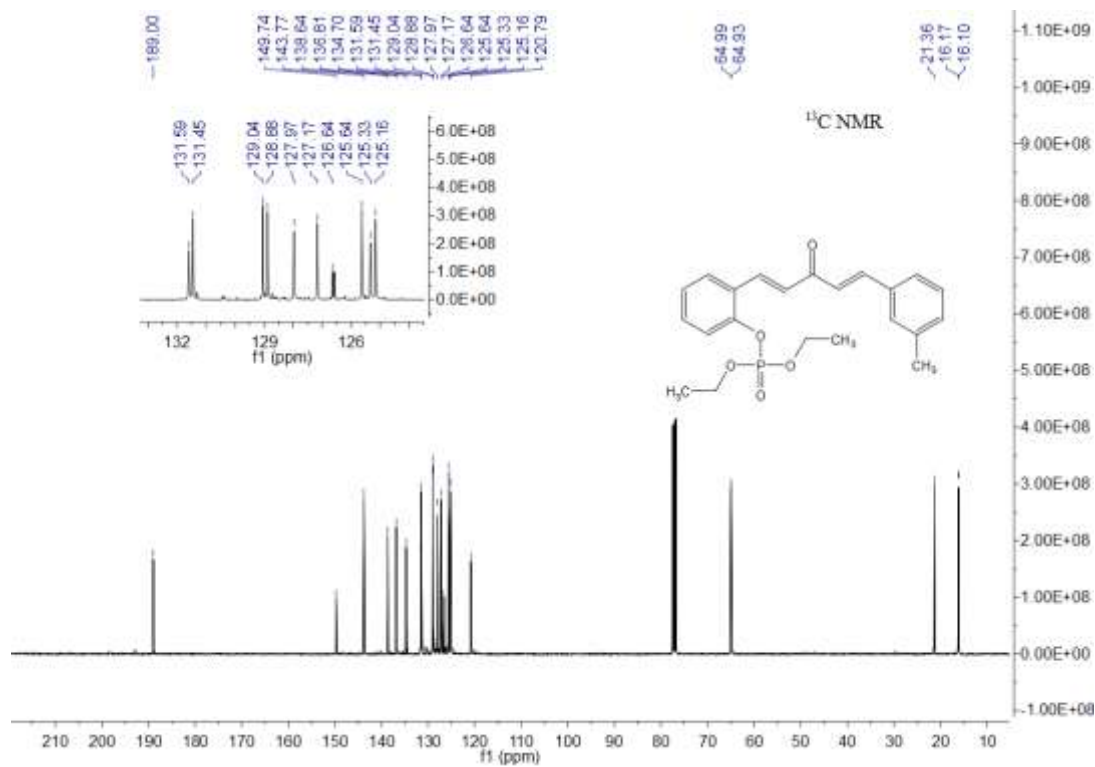

<sup>13</sup>C NMR of compound 3s

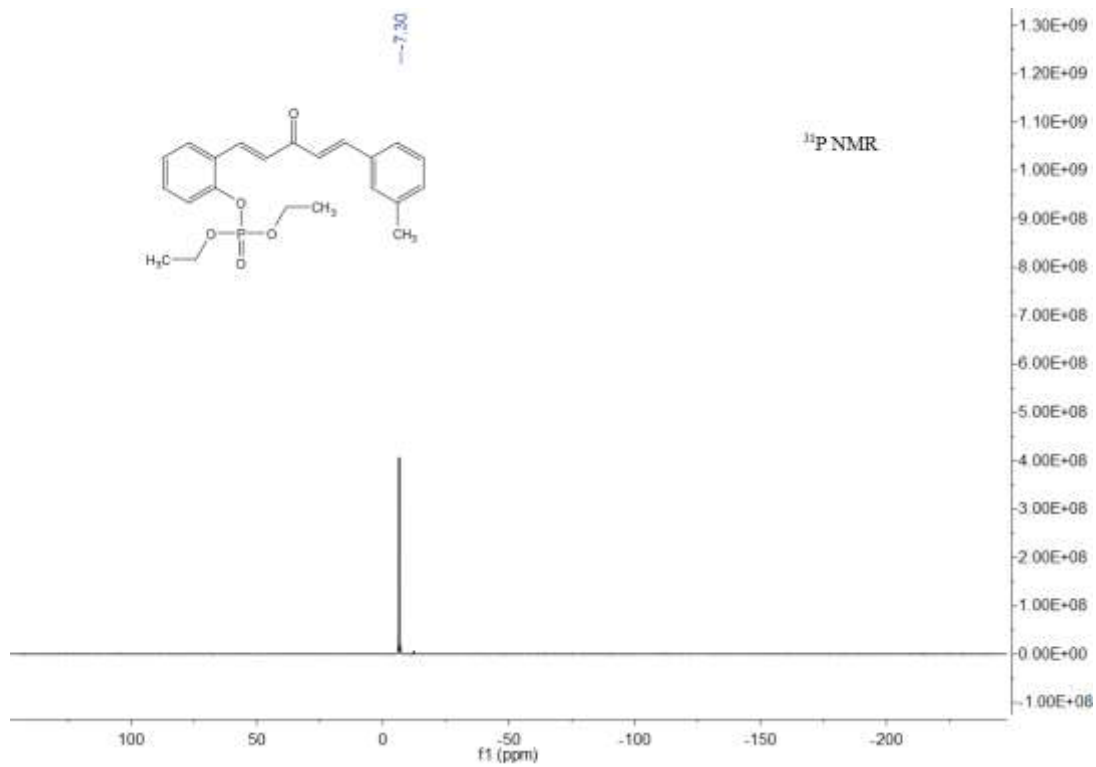

<sup>31</sup>P NMR of compound 3s

2018081007 #117 RT: 1.17 AV: 1 NL: 3.31E7  
T: FTMS + p ESI Full ms [100.0000-1000.0000]

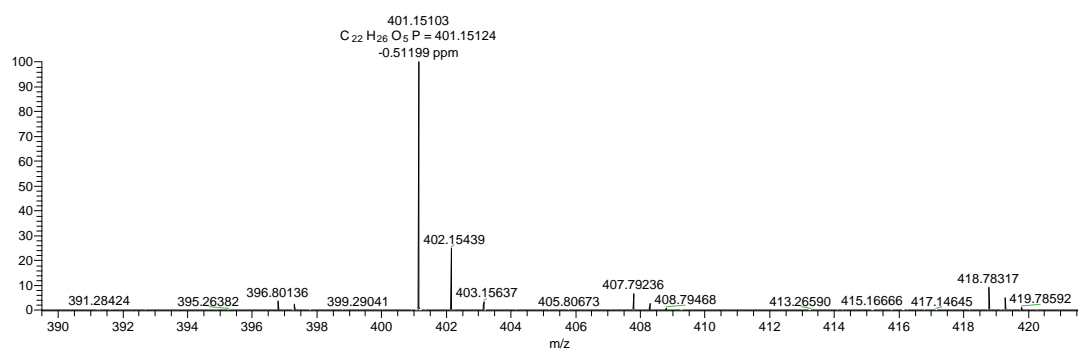

HRMS of compound 3s
